# Supplementary material for: Determination of Genetic and Epigenetic Modifications-Related Prognostic Biomarkers of Breast Cancer: Genome High-Throughput Data Analysis
Source: J Oncol. 2021 Sep 13;2021:2143362. doi: 10.1155/2021/2143362 (PMC8455195; doi:10.1155/2021/2143362)
Supplement: Supplementary Materials — Supplementary Material 1: genes with abnormal CNV mutations between breast cancer and normal tissues. [file 2143362.f1.txt]

Gene	normalRatio	tumorRatio	Stat	Pvalue	adjPvalue
SHOC2	0	0.0910746812386157	103.147198577794	3.11149283476603e-24	5.96722095851429e-20
ARHGAP8	0.014505893019039	0.207650273224044	206.293393182237	8.84251776772465e-47	1.69581805749423e-42
TERF1	0.00181323662737987	0.377959927140255	504.522609758736	9.86166985666305e-112	1.89127104511084e-107
C6orf47	0	0.110200364298725	126.509578085074	2.37850986762151e-29	4.56150622412453e-25
MOCS1	0	0.124772313296903	144.628954610224	2.58869796121445e-33	4.96460495001707e-29
DDX17	0	0.186703096539162	224.878948622002	7.80211227146895e-51	1.49628909142232e-46
PTTG2	0	0.0837887067395264	94.3698416242314	2.61749973278805e-22	5.01984098754092e-18
DPYSL5	0	0.0546448087431694	59.918742117791	9.88555887170373e-15	1.89585248041534e-10
LAS1L	0	0.0282331511839709	29.585568399315	5.35018024761541e-08	0.00102605756788768
OXGR1	0	0.200364298724954	243.323064581465	7.41565332462448e-55	1.42217399459648e-50
NXF5	0.00181323662737987	0.0200364298724954	15.2949714147329	9.19609889325112e-05	1
METTL7B	0	0.0564663023679417	62.041556368439	3.36285214548535e-15	6.44927784461180e-11
MRPL33	0.00271985494106981	0.0555555555555556	52.5533210742086	4.18724073151034e-13	8.03029027489053e-09
PSMD8	0	0.0938069216757741	106.456001642844	5.85787389460085e-25	1.12342305550655e-20
HSF2BP	0.000906618313689937	0.114754098360656	129.083799661527	6.50147060623964e-30	1.24685203286464e-25
URB1	0.000906618313689937	0.0910746812386157	100.130171930813	1.42702971503132e-23	2.73675758748707e-19
RHBDF2	0	0.209471766848816	255.775131222782	1.43042530609038e-57	2.74326965202013e-53
SGK2	0	0.193989071038251	234.681167175435	5.68200648896253e-53	1.08969520445323e-48
FOXC1	0	0.140255009107468	164.191390272646	1.37388869240086e-37	2.63484373428637e-33
OR1N2	0	0.0956284153005464	108.667142153936	1.91960691060315e-25	3.68142213315472e-21
POM121L2	0	0.116575591985428	134.402357463757	4.46130818695154e-31	8.55589684093566e-27
A2ML1	0.00271985494106981	0.119307832422587	128.784585901405	7.55929760090758e-30	1.44972209390206e-25
MEGF6	0	0.124772313296903	144.628954610224	2.58869796121445e-33	4.96460495001707e-29
HSD17B10	0	0.040983606557377	44.1247278223639	3.08104059265001e-11	5.90881964858419e-07
CBX4	0	0.216757741347905	265.82814270084	9.20816671396344e-60	1.76594221240391e-55
LGI1	0	0.0765027322404372	85.6589949531454	2.13800743610054e-20	4.10027066095362e-16
CAAP1	0	0.13752276867031	160.715605626687	7.89403852224128e-37	1.51391870779543e-32
SPRY4	0	0.0910746812386157	103.147198577794	3.11149283476603e-24	5.96722095851429e-20
CTD-2545G14.7	0	0.248633879781421	310.791107567942	1.46854727229749e-69	2.81637995881213e-65
UQCR11	0	0.10655737704918	122.023250109717	2.28148539532661e-28	4.37543269115737e-24
SMTNL1	0.000906618313689937	0.110200364298725	123.458912535907	1.10654078262404e-28	2.12212391291638e-24
NPTX2	0	0.104735883424408	119.786545952838	7.04474435619752e-28	1.35104107263156e-23
ZKSCAN5	0	0.108378870673953	124.264256770829	7.37393296826173e-29	1.41417286465323e-24
SLC35B1	0.000906618313689937	0.213114754098361	257.598462046562	5.72800308289844e-58	1.09851643123826e-53
DENND3	0.00181323662737987	0.439890710382514	612.120852654713	3.86776941193006e-135	7.41760817819947e-131
PLIN5	0	0.0737704918032787	82.4094313553584	1.10624684270184e-19	2.12156019493359e-15
KRT6C	0	0.0591985428051002	65.2332953689644	6.65358094439778e-16	1.27602375351661e-11
PLCXD2	0	0.0819672131147541	92.1859223559541	7.89040688660219e-22	1.51322223271257e-17
ZNF491	0	0.0710382513661202	79.1690868026161	5.70152621815275e-19	1.09343869811733e-14
TMEM55B	0	0.103825136612022	118.669803534703	1.23698351594154e-27	2.37228698687269e-23
DHFR	0	0.123861566484517	143.488260376533	4.59701946479677e-33	8.81616392958725e-29
ESRP1	0.00181323662737987	0.436247723132969	605.555950910945	1.03596407451371e-133	1.98677190210239e-129
RNASE10	0	0.10200364298725	116.439530497623	3.8081508916268e-27	7.30327177996188e-23
TPD52	0.00543970988213962	0.404371584699454	535.939778385187	1.44122330598109e-118	2.76397805621053e-114
AC123512.1	0	0.0919854280510018	104.249080504143	1.78415788957303e-24	3.42165800062316e-20
KRT33A	0	0.176684881602914	211.52852006614	6.37370081951109e-48	1.22234834316584e-43
UBE2D1	0	0.0783242258652095	87.8305099254412	7.13104526287773e-21	1.36759186051469e-16
CBFA2T2	0	0.157559198542805	186.443608885751	1.89955610505757e-42	3.64296869827941e-38
PI15	0.00271985494106981	0.379781420765027	504.212345940109	1.1520105228749e-111	2.20932578076948e-107
CLCN7	0	0.290528233151184	372.428873623425	5.53805983624434e-83	1.06208911539494e-78
HAAO	0	0.0564663023679417	62.041556368439	3.36285214548535e-15	6.44927784461180e-11
DEFA1	0	0.341530054644809	451.657932555487	3.14271530801702e-100	6.02709941771504e-96
PNMAL2	0	0.075591985428051	84.5747805666215	3.69954185087099e-20	7.09498136160038e-16
GPR4	0.000906618313689937	0.0783242258652095	84.8394528848151	3.23602404330414e-20	6.20604691024868e-16
GLRX5	0	0.117486338797814	135.53425506436	2.52277621816039e-31	4.838180231188e-27
SCUBE1	0.00362647325475975	0.197632058287796	227.138652766997	2.50825308263221e-51	4.81032776187205e-47
SIGLEC9	0	0.0819672131147541	92.1859223559541	7.89040688660219e-22	1.51322223271257e-17
TMEM132A	0	0.112932604735883	129.885676763625	4.34071682148543e-30	8.32462672024476e-26
ZNF850	0	0.0856102003642987	96.5579176558098	8.66710083014542e-23	1.66217659720529e-18
ACAT2	0	0.169398907103825	201.910692604669	7.99623712236527e-46	1.53351835532721e-41
CHRM2	0.000906618313689937	0.11384335154827	127.956634045054	1.14722453855395e-29	2.20014722003877e-25
RNF215	0.000906618313689937	0.18488160291439	219.283765620942	1.29602597227528e-49	2.48551860962953e-45
TRIM69	0	0.0883424408014572	99.8478501098372	1.64565900586024e-23	3.15604484143877e-19
KIF2C	0	0.0856102003642987	96.5579176558098	8.66710083014542e-23	1.66217659720529e-18
ACER1	0.000906618313689937	0.0801457194899818	87.011142181804	1.07911517927719e-20	2.06952709081779e-16
MRPL57	0	0.168488160291439	200.713832735135	1.45901236121098e-45	2.79809390633042e-41
ZFP69B	0.000906618313689937	0.0892531876138433	97.9330531560583	4.32769256628363e-23	8.29964880361875e-19
CAB39	0	0.0546448087431694	59.918742117791	9.88555887170373e-15	1.89585248041534e-10
ZBTB18	0	0.534608378870674	801.401544011312	2.67510331266925e-176	5.13031313303709e-172
C18orf8	0	0.111111111111111	127.633860551138	1.34982661394651e-29	2.58869748022662e-25
NPL	0	0.520036429872495	771.831799265613	7.18575108790521e-170	1.37808334363846e-165
OMA1	0	0.10200364298725	116.439530497623	3.8081508916268e-27	7.30327177996188e-23
FGF16	0	0.0145719489981785	14.2342813455208	0.000161403256632973	1
ABCD1	0	0.0446265938069217	48.3145964197624	3.63039809481072e-12	6.962377466228e-08
DLGAP2	0.00453309156844968	0.366120218579235	474.921054136931	2.72221913607849e-105	5.22067185917133e-101
NUMA1	0.00181323662737987	0.178506375227687	207.688616988483	4.38689324802425e-47	8.41318387106091e-43
CTXN3	0	0.105646630236794	120.904360975029	4.0100522805236e-28	7.69047826358816e-24
INTS7	0	0.542805100182149	818.293607682811	5.68534947200198e-180	1.09033632174054e-175
CD4	0	0.12568306010929	145.770755533448	1.456993559777e-33	2.79422224894033e-29
ZDHHC9	0	0.0264116575591985	27.5246475442755	1.55105216785573e-07	0.00297460784751372
CAMSAP2	0	0.530965391621129	793.954281017166	1.11305201294598e-174	2.1346111504278e-170
CACNA2D1	0.00906618313689937	0.11384335154827	103.110148144379	3.17023001475641e-24	6.07986712229984e-20
RP1-139D8.6	0.00181323662737987	0.131147540983607	146.533379994702	9.92516541440503e-34	1.9034482231746e-29
CYP24A1	0.000906618313689937	0.26775956284153	335.300523583843	6.73524872709343e-75	1.29168600088198e-70
CDC7	0	0.11384335154827	131.013213586699	2.45963552571946e-30	4.71708901122478e-26
GLTPD2	0	0.224043715846995	275.963440166174	5.69186931138351e-62	1.09158669653713e-57
FOXN1	0	0.177595628415301	212.736143748642	3.47483939542131e-48	6.66404699253899e-44
GRID2	0.0108794197642792	0.0938069216757741	74.75027201976	5.34184137468833e-18	1.02445833883773e-13
TSHB	0	0.0992714025500911	113.102128002462	2.04942098346858e-26	3.93037956209604e-22
PIM1	0	0.120218579234973	138.93651861976	4.5475623956484e-32	8.7213151623745e-28
TSPAN8	0.00634632819582956	0.10655737704918	102.060785939	5.38439357612032e-24	1.03261900002835e-19
INPP4B	0.00453309156844968	0.0801457194899818	75.8807155957956	3.01328544707358e-18	5.77887883039771e-14
CHST13	0	0.0846994535519126	95.4633593484203	1.50654005036232e-22	2.88924250858486e-18
MAPKAPK2	0	0.549180327868853	831.563427309939	7.4091391770832e-183	1.42092471138102e-178
WWC3	0	0.0591985428051002	65.2332953689644	6.65358094439778e-16	1.27602375351661e-11
FFAR2	0	0.0901639344262295	102.046367158732	5.42372800574511e-24	1.0401625569418e-19
DHX57	0.00181323662737987	0.0564663023679417	56.2962627110318	6.23337940771856e-14	1.19543750281227e-09
CCDC117	0	0.182149362477231	218.79237182518	1.6588278345047e-49	3.18130002101311e-45
AIF1L	0	0.0992714025500911	113.102128002462	2.04942098346858e-26	3.93037956209604e-22
ARSI	0	0.0919854280510018	104.249080504143	1.78415788957303e-24	3.42165800062316e-20
KCNJ12	0	0.20856102003643	254.52424069987	2.68008771174966e-57	5.1398722135935e-53
TCEAL1	0	0.0154826958105647	15.2494668292624	9.42033452479637e-05	1
KIFC1	0	0.11384335154827	131.013213586699	2.45963552571946e-30	4.71708901122478e-26
ZNRF4	0.000906618313689937	0.0865209471766849	94.6453502618533	2.27740576303999e-22	4.36760877235809e-18
HSPG2	0	0.1183970856102	136.667246747984	1.42583956641807e-31	2.73447512047657e-27
TMTC4	0	0.205828779599271	250.779170602092	1.7562021296358e-56	3.36804444421554e-52
SLC25A18	0.000906618313689937	0.177595628415301	209.588758703973	1.68883573045768e-47	3.23884916387174e-43
NEDD1	0	0.0828779599271403	93.2773630892577	4.54561443226851e-22	8.71757935820455e-18
OLIG3	0	0.164845173041894	195.938246853666	1.60783640585821e-44	3.08350865915487e-40
ALOX12B	0	0.24408014571949	304.268128279318	3.87178707007485e-68	7.42531324298955e-64
CARD9	0.00181323662737987	0.109289617486339	119.353386653275	8.76392380452724e-28	1.68074530723223e-23
SMNDC1	0	0.0901639344262295	102.046367158732	5.42372800574511e-24	1.0401625569418e-19
CCDC82	0.000906618313689937	0.226775956284153	276.575530635814	4.18661941003754e-62	8.02909870456999e-58
KRT31	0	0.174863387978142	209.116880247315	2.14061908388868e-47	4.10527927908171e-43
CD200	0	0.0783242258652095	87.8305099254412	7.13104526287773e-21	1.36759186051469e-16
ITPRIPL2	0	0.285974499089253	365.583537988405	1.7132084258556e-81	3.28559111910587e-77
SHANK1	0.000906618313689937	0.0746812386156648	80.5087277506493	2.894237479152e-19	5.55056863751771e-15
IFI16	0.000906618313689937	0.52367941712204	775.598422923424	1.09019911332177e-170	2.09078385952849e-166
GK2	0	0.0783242258652095	87.8305099254412	7.13104526287773e-21	1.36759186051469e-16
ACSS3	0.00181323662737987	0.092896174863388	99.3873835799898	2.0764114191092e-23	3.98214181956762e-19
GABRR1	0	0.183970856102004	221.22334797327	4.89264258550011e-50	9.38310995047211e-46
ZNF311	0	0.112932604735883	129.885676763625	4.34071682148543e-30	8.32462672024476e-26
ZHX1-C8orf76	0.000906618313689937	0.45264116575592	638.809775575756	6.06452535876273e-141	1.16305467330352e-136
USP42	0.000906618313689937	0.131147540983607	149.56169632748	2.16154055719506e-34	4.14540248058869e-30
TMED8	0	0.119307832422587	137.801334077567	8.05447961614703e-32	1.54468810078468e-27
ABCF2	0	0.120218579234973	138.93651861976	4.5475623956484e-32	8.7213151623745e-28
CNTNAP4	0.00181323662737987	0.327868852459016	423.318179424775	4.62606739062296e-94	8.87187204173671e-90
IRAK4	0	0.0673952641165756	74.8629080910529	5.04560938683949e-18	9.67646968208077e-14
ATG16L1	0	0.0573770491803279	63.1044660176753	1.96029135219058e-15	3.75944675523109e-11
MAP3K13	0	0.132969034608379	154.945195560807	1.43936270435889e-35	2.76040979441948e-31
PAAF1	0.00181323662737987	0.190346083788707	223.480640041408	1.57468492869795e-50	3.01993075625693e-46
IFNA7	0.000906618313689937	0.155737704918033	180.963537261841	2.98568563091579e-41	5.7259479029703e-37
GOLGA6D	0	0.0819672131147541	92.1859223559541	7.89040688660219e-22	1.51322223271257e-17
RNF149	0	0.0437158469945355	47.2656407481687	6.19893609935481e-12	1.18883196513427e-07
BHLHE23	0	0.241347905282332	300.37051478936	2.73557635141026e-67	5.2462883267346e-63
LYRM4	0.000906618313689937	0.150273224043716	173.91304335842	1.03412771753326e-39	1.98325013668529e-35
MARCH5	0	0.0774134790528233	86.7442376274021	1.2350313019115e-20	2.36854303080587e-16
KCTD17	0	0.186703096539162	224.878948622002	7.80211227146895e-51	1.49628909142232e-46
UFD1L	0	0.159380692167577	188.810236404934	5.78142531668859e-43	1.10876174723454e-38
SYNC	0.000906618313689937	0.0956284153005464	105.641634126938	8.8351746042954e-25	1.69440978561177e-20
TMEM203	0	0.107468123861566	123.143214869447	1.29738122602225e-28	2.48811771526547e-24
CTB-60B18.6	0	0.0701275045537341	78.0910145866485	9.84005435570406e-19	1.88712562433692e-14
KIAA1462	0.000906618313689937	0.0992714025500911	110.070071255495	9.4587419114262e-26	1.81399752377332e-21
WNT2	0	0.101092896174863	115.325996882723	6.67677841881049e-27	1.28047256515948e-22
NPAS1	0	0.0701275045537341	78.0910145866485	9.84005435570406e-19	1.88712562433692e-14
ILDR1	0	0.0837887067395264	94.3698416242314	2.61749973278805e-22	5.01984098754092e-18
AVPR2	0	0.046448087431694	50.4154862878962	1.2440860764818e-12	2.3859082774768e-08
EIF2AK4	0	0.100182149362477	114.213529880073	1.17005360366453e-26	2.24392880110784e-22
CXorf56	0.000906618313689937	0.0218579234972678	19.6837614888871	9.13745376949836e-06	0.17523808839144
ZNF71	0	0.0901639344262295	102.046367158732	5.42372800574511e-24	1.0401625569418e-19
HIF3A	0.00181323662737987	0.0792349726775956	83.0204423228557	8.12092061744141e-20	1.55743015601291e-15
LRRC27	0.000906618313689937	0.11384335154827	127.956634045054	1.14722453855395e-29	2.20014722003877e-25
RAB6B	0.00181323662737987	0.0910746812386157	97.190887150685	6.29557392322029e-23	1.20736516699519e-18
RNF166	0	0.336976320582878	444.386865275091	1.20145053056131e-98	2.30414182751048e-94
TIGD6	0	0.0919854280510018	104.249080504143	1.78415788957303e-24	3.42165800062316e-20
C11orf1	0	0.261384335154827	329.23677161381	1.40935400241846e-73	2.70285910583812e-69
FBXL18	0	0.136612021857924	159.559271546042	1.41235216549096e-36	2.70860898297856e-32
FAT3	0.00271985494106981	0.231329690346084	276.62980465412	4.07413789321271e-62	7.81338165160334e-58
CSNK2A3	0	0.123861566484517	143.488260376533	4.59701946479677e-33	8.81616392958725e-29
TMEM263	0.00181323662737987	0.0774134790528233	80.8568313903875	2.42677461745467e-19	4.65406836135457e-15
ATP6V0A1	0	0.164845173041894	195.938246853666	1.60783640585821e-44	3.08350865915487e-40
CTD-2192J16.17	0.000906618313689937	0.0737704918032787	79.4286801049336	4.99950714863977e-19	9.58805480966135e-15
THRA	0	0.214936247723133	263.307214736305	3.26316827966007e-59	6.25810412673208e-55
SPATA2	0	0.224043715846995	275.963440166174	5.69186931138351e-62	1.09158669653713e-57
CTSG	0	0.0974499089253188	110.882513695638	6.27833544390129e-26	1.20405917143139e-21
TARS2	0	0.515482695810565	762.709940679739	6.91565847524285e-168	1.32628498238207e-163
CCDC39	0	0.148451730418944	174.680172552384	7.03151855047945e-40	1.34850462761095e-35
GNPTAB	0	0.075591985428051	84.5747805666215	3.69954185087099e-20	7.09498136160038e-16
KIAA1161	0	0.1183970856102	136.667246747984	1.42583956641807e-31	2.73447512047657e-27
GPR161	0.000906618313689937	0.52367941712204	775.598422923424	1.09019911332177e-170	2.09078385952849e-166
RECQL5	0	0.213114754098361	260.791413895083	1.15347397770304e-58	2.21213239443889e-54
RCN3	0	0.0737704918032787	82.4094313553584	1.10624684270184e-19	2.12156019493359e-15
TYR	0.00181323662737987	0.218579234972678	261.988143635183	6.32636916773266e-59	1.21327107898777e-54
PLCL1	0.00453309156844968	0.0573770491803279	49.570465691435	1.9137306261485e-12	3.67015259482759e-08
MCHR1	0	0.189435336976321	228.545556899213	1.2374756313606e-51	2.37323076582336e-47
FAM63A	0	0.513661202185792	759.07679979462	4.26377416491213e-167	8.17706609346848e-163
FSCN1	0	0.133879781420765	156.097028769352	8.06240533470277e-36	1.5462080950893e-31
ZBTB4	0	0.247723132969035	309.483806253591	2.8292695272888e-69	5.42597309943446e-65
ANKZF1	0	0.0491803278688525	53.5742739679222	2.48998750100034e-13	4.77529802941845e-09
USP29	0.000906618313689937	0.0856102003642987	93.5515724516684	3.95753115320078e-22	7.58975324560846e-18
AC231657.1	0	0.0400728597449909	43.0797413251017	5.25536188251263e-11	1.00787330182827e-06
OR1J1	0	0.0974499089253188	110.882513695638	6.27833544390129e-26	1.20405917143139e-21
FAXC	0	0.183970856102004	221.22334797327	4.89264258550011e-50	9.38310995047211e-46
CHP2	0.000906618313689937	0.276867030965392	348.729337560436	8.01393416595982e-78	1.53691229434777e-73
CHRDL2	0	0.200364298724954	243.323064581465	7.41565332462448e-55	1.42217399459648e-50
NPHP1	0	0.0336976320582878	35.7926554831816	2.19473706761557e-09	4.20906674827314e-05
WDTC1	0	0.11384335154827	131.013213586699	2.45963552571946e-30	4.71708901122478e-26
CASC5	0.00181323662737987	0.0974499089253188	104.897794962066	1.28600980083035e-24	2.46630959603245e-20
RPGR	0.000906618313689937	0.0373406193078324	37.0998301386087	1.12233498450791e-09	2.15241403328927e-05
APOBEC3F	0.000906618313689937	0.183970856102004	218.06763539461	2.38720579757407e-49	4.57818327858755e-45
SNPH	0	0.158469945355191	187.62633866331	1.04825458709507e-42	2.01034264713093e-38
PDZRN4	0.00453309156844968	0.0737704918032787	68.421976097124	1.31998309915187e-16	2.53146358755346e-12
SIK3	0.00181323662737987	0.257741347905282	317.471005427708	5.14965037160137e-71	9.87599948265711e-67
RAC2	0	0.185792349726776	223.65919444739	1.43962429492378e-50	2.76091147280482e-46
GJA8	0	0.403460837887067	554.650757778844	1.22537497201094e-122	2.35002412132258e-118
GCH1	0	0.101092896174863	115.325996882723	6.67677841881049e-27	1.28047256515948e-22
DCC	0.0181323662737987	0.13752276867031	107.797439694735	2.97700693217949e-25	5.70930389453383e-21
DDX58	0.000906618313689937	0.121129326047359	137.004746887715	1.20297169754369e-31	2.30705912154929e-27
TMEM107	0	0.24408014571949	304.268128279318	3.87178707007485e-68	7.42531324298955e-64
STX17	0	0.0892531876138433	100.946584812457	9.44977196481201e-24	1.81227726741165e-19
ZNF146	0	0.0865209471766849	97.6535179466407	4.98385400169837e-23	9.55803520445713e-19
PRDX2	0	0.0719489981785064	80.2481794814122	3.30216578881196e-19	6.33289354978358e-15
LCE4A	0	0.520947176684882	773.66289062781	2.87304551359987e-170	5.50992668598183e-166
POLR3G	0	0.124772313296903	144.628954610224	2.58869796121445e-33	4.96460495001707e-29
TUT1	0	0.110200364298725	126.509578085074	2.37850986762151e-29	4.56150622412453e-25
SLC35A4	0	0.0919854280510018	104.249080504143	1.78415788957303e-24	3.42165800062316e-20
C8orf44	0.00271985494106981	0.37431693989071	495.097802475714	1.10815357002085e-109	2.12521691658599e-105
ABHD14A	0	0.111111111111111	127.633860551138	1.34982661394651e-29	2.58869748022662e-25
OR6P1	0	0.487249544626594	707.376514111565	7.44122769551666e-156	1.42707864744619e-151
AK1	0	0.101092896174863	115.325996882723	6.67677841881049e-27	1.28047256515948e-22
PTGFR	0.00362647325475975	0.10655737704918	110.239881917757	8.68221491344457e-26	1.6650751761004e-21
FIGF	0	0.0528233151183971	57.7999282715382	2.90180302459607e-14	5.56507784057034e-10
TRPC4	0.00271985494106981	0.193078324225865	224.062115673679	1.17589491626896e-50	2.25513127042061e-46
FHOD3	0.00815956482320943	0.120218579234973	113.379121968935	1.78221682029491e-26	3.41793541796158e-22
B3GNT3	0	0.0719489981785064	80.2481794814122	3.30216578881196e-19	6.33289354978358e-15
LRRC32	0.000906618313689937	0.214025500910747	258.854576068206	3.04925177634966e-58	5.84785505668338e-54
PDK3	0.00181323662737987	0.0573770491803279	57.3515491340932	3.6447612764253e-14	6.98992317592844e-10
NUP62CL	0	0.0209471766848816	21.366940797415	3.79254652448788e-06	0.0727334572466286
POU1F1	0	0.0865209471766849	97.6535179466407	4.98385400169837e-23	9.55803520445713e-19
OR10D3	0	0.246812386156648	308.177859768971	5.44715072766855e-69	1.04465456655227e-64
TSEN34	0	0.0810564663023679	91.0955180434138	1.36901417587232e-21	2.62549538648794e-17
CNNM3	0	0.0446265938069217	48.3145964197624	3.63039809481072e-12	6.962377466228e-08
CDH18	0.0126926563916591	0.163023679417122	153.570552573329	2.87462334627229e-35	5.512952653481e-31
SLC39A13	0	0.0883424408014572	99.8478501098372	1.64565900586024e-23	3.15604484143877e-19
PP2D1	0	0.0765027322404372	85.6589949531454	2.13800743610054e-20	4.10027066095362e-16
EIF6	0	0.16120218579235	191.181542677073	1.75561749312807e-43	3.36692322832101e-39
B3GALT1	0	0.0437158469945355	47.2656407481687	6.19893609935481e-12	1.18883196513427e-07
SPDYE16	0	0.0792349726775956	88.9178131914755	4.11560709029152e-21	7.89291127776108e-17
ADCK4	0.000906618313689937	0.0819672131147541	89.1870550166065	3.59191657425573e-21	6.88857760610764e-17
SEMA3A	0.00271985494106981	0.1183970856102	127.656077260166	1.33480082130919e-29	2.55988101510676e-25
GUCD1	0.000906618313689937	0.181238615664845	214.426552193496	1.48649788691424e-48	2.85080564752413e-44
TRUB2	0	0.0992714025500911	113.102128002462	2.04942098346858e-26	3.93037956209604e-22
KLHDC3	0	0.126593806921676	146.913664738406	8.19604965506095e-34	1.57183840284759e-29
MID1	0.00271985494106981	0.0664845173041894	65.2106560710537	6.73045970254622e-16	1.29076756175431e-11
ZNF558	0	0.0728597449908925	81.3282939023744	1.91169921745354e-19	3.6662567592324e-15
TLE3	0.000906618313689937	0.0828779599271403	90.2765968422046	2.07087698371149e-21	3.97152787936189e-17
TGM5	0	0.0910746812386157	103.147198577794	3.11149283476603e-24	5.96722095851429e-20
SLC35F5	0	0.0418943533697632	45.1707065722392	1.80586172080178e-11	3.46328160815365e-07
TRIM38	0	0.123861566484517	143.488260376533	4.59701946479677e-33	8.81616392958725e-29
TAF5	0	0.0901639344262295	102.046367158732	5.42372800574511e-24	1.0401625569418e-19
ZBTB5	0	0.111111111111111	127.633860551138	1.34982661394651e-29	2.58869748022662e-25
C9orf172	0	0.103825136612022	118.669803534703	1.23698351594154e-27	2.37228698687269e-23
SNRPA1	0	0.123861566484517	143.488260376533	4.59701946479677e-33	8.81616392958725e-29
COX6C	0.00181323662737987	0.447176684881603	625.342929896467	5.14869692963338e-138	9.8741709716509e-134
NCSTN	0	0.538251366120219	808.885812255267	6.31159060636041e-178	1.2104368464878e-173
LRRC8B	0	0.112932604735883	129.885676763625	4.34071682148543e-30	8.32462672024476e-26
SMCR8	0	0.218579234972678	268.35421345888	2.59182244052439e-60	4.97059707643767e-56
TRIM72	0	0.264116575591985	333.224578670884	1.90756787381081e-74	3.65833366839437e-70
ENTHD1	0.000906618313689937	0.185792349726776	220.501116752687	7.03198284179019e-50	1.34859366939852e-45
STX1A	0	0.0883424408014572	99.8478501098372	1.64565900586024e-23	3.15604484143877e-19
GYS1	0.000906618313689937	0.0719489981785064	77.2717430294431	1.48982323128329e-18	2.85718299295509e-14
PLEKHA5	0	0.122040072859745	141.21018562702	1.44737799576088e-32	2.77578152027022e-28
TFF1	0	0.109289617486339	125.386377334497	4.18901417741995e-29	8.03369138945598e-25
MTMR4	0	0.226775956284153	279.785597353116	8.36215574788914e-63	1.60369422933018e-58
FGD4	0.000906618313689937	0.107468123861566	120.09707214682	6.02396096030487e-28	1.15527523296727e-23
LIPJ	0	0.0883424408014572	99.8478501098372	1.64565900586024e-23	3.15604484143877e-19
NPHP3	0	0.0901639344262295	102.046367158732	5.42372800574511e-24	1.0401625569418e-19
ECD	0	0.0819672131147541	92.1859223559541	7.89040688660219e-22	1.51322223271257e-17
ACTR3C	0.00181323662737987	0.119307832422587	131.730966310142	1.71334079166351e-30	3.28584497025228e-26
CPSF3	0	0.0664845173041894	73.7889051620255	8.69338579712059e-18	1.66721752817179e-13
RIN1	0	0.126593806921676	146.913664738406	8.19604965506095e-34	1.57183840284759e-29
KBTBD7	0	0.209471766848816	255.775131222782	1.43042530609038e-57	2.74326965202013e-53
CDX2	0.000906618313689937	0.160291438979964	186.87098694685	1.53234360154528e-42	2.93872855904354e-38
COL3A1	0.000906618313689937	0.0482695810564663	49.6162069998173	1.86962838220145e-12	3.58557331138594e-08
ZNF746	0	0.1183970856102	136.667246747984	1.42583956641807e-31	2.73447512047657e-27
ERVFRD-1	0	0.154826958105647	182.902410158011	1.12650667767553e-41	2.16041450644613e-37
ZNF777	0.000906618313689937	0.120218579234973	135.869874538388	2.13044571827045e-31	4.08576879849907e-27
RP11-903H12.5	0	0.101092896174863	115.325996882723	6.67677841881049e-27	1.28047256515948e-22
TOX2	0.00181323662737987	0.195810564663024	230.839415168984	3.91094361129931e-52	7.50040765774982e-48
C3orf58	0	0.105646630236794	120.904360975029	4.0100522805236e-28	7.69047826358816e-24
ZCCHC14	0	0.344262295081967	456.039718359889	3.49723622812877e-101	6.70699963830535e-97
SYT16	0	0.112932604735883	129.885676763625	4.34071682148543e-30	8.32462672024476e-26
ANKRD20A4	0	0.0655737704918033	72.7159164761831	1.49721726795334e-17	2.87136327648092e-13
P2RX4	0	0.0664845173041894	73.7889051620255	8.69338579712059e-18	1.66721752817179e-13
GREM2	0	0.532786885245902	797.673304032203	1.72952811263863e-175	3.31688901441836e-171
C2CD4D	0	0.516393442622951	764.529846341275	2.78054464395939e-168	5.33252851818532e-164
NME1	0	0.224954462659381	277.23618836748	3.00530858933816e-62	5.76358081263272e-58
ZNF681	0.00271985494106981	0.0765027322404372	76.9699487081929	1.73579155653914e-18	3.32890104713076e-14
ERVW-1	0	0.108378870673953	124.264256770829	7.37393296826173e-29	1.41417286465323e-24
ABCB11	0	0.0491803278688525	53.5742739679222	2.48998750100034e-13	4.77529802941845e-09
SDR39U1	0.000906618313689937	0.101092896174863	112.290736605664	3.08574060096966e-26	5.91783332453961e-22
PAN3	0	0.166666666666667	198.323672587943	4.84899325511854e-45	9.29939926466634e-41
LRP2BP	0.00362647325475975	0.114754098360656	120.27820105941	5.49830066822591e-28	1.05446410215236e-23
PAGE2B	0	0.0473588342440801	51.4674212860382	7.2795130984703e-13	1.39606502202463e-08
URGCP	0	0.116575591985428	134.402357463757	4.46130818695154e-31	8.55589684093566e-27
FBP1	0	0.0910746812386157	103.147198577794	3.11149283476603e-24	5.96722095851429e-20
KRTAP19-7	0	0.087431693989071	98.7501616272355	2.86453575608321e-23	5.49360667301638e-19
WBP11	0	0.122950819672131	142.348671243786	8.15911456088885e-33	1.56475499048726e-28
GABPA	0	0.104735883424408	119.786545952838	7.04474435619752e-28	1.35104107263156e-23
LUM	0	0.0919854280510018	104.249080504143	1.78415788957303e-24	3.42165800062316e-20
EIF2S3L	0	0.121129326047359	140.072801944905	2.56621872284125e-32	4.92149426666495e-28
TLK1	0.00543970988213962	0.0455373406193078	34.0808004208293	5.28703661814881e-09	0.000101394788262858
C10orf71	0.000906618313689937	0.0673952641165756	71.8978178303321	2.26634432232895e-17	4.34639514136246e-13
NR4A3	0	0.0883424408014572	99.8478501098372	1.64565900586024e-23	3.15604484143877e-19
MAMSTR	0	0.0683060109289618	75.9379264815224	2.92723428044392e-18	5.61384990303535e-14
TSEN2	0	0.0846994535519126	95.4633593484203	1.50654005036232e-22	2.88924250858486e-18
NLRP9	0	0.0892531876138433	100.946584812457	9.44977196481201e-24	1.81227726741165e-19
POMT1	0	0.0983606557377049	111.991789767092	3.58792930267723e-26	6.88093081667439e-22
PPP1R18	0	0.124772313296903	144.628954610224	2.58869796121445e-33	4.96460495001707e-29
CPO	0	0.0482695810564663	52.5203503198579	4.258130438957e-13	8.16624255583173e-09
KIAA2022	0.000906618313689937	0.0136612021857923	10.6994804951434	0.00107165622653301	1
ITLN1	0	0.541894353369763	816.407362247147	1.46167245163134e-179	2.80319542773858e-175
GRHPR	0	0.110200364298725	126.509578085074	2.37850986762151e-29	4.56150622412453e-25
ESRRB	0.00362647325475975	0.117486338797814	123.645207388461	1.00737620711432e-28	1.93194609000384e-24
ADAM8	0	0.11384335154827	131.013213586699	2.45963552571946e-30	4.71708901122478e-26
XRCC5	0	0.0473588342440801	51.4674212860382	7.2795130984703e-13	1.39606502202463e-08
C8orf86	0.000906618313689937	0.343351548269581	451.224872892876	3.90436260509465e-100	7.48778660405052e-96
SRM	0	0.119307832422587	137.801334077567	8.05447961614703e-32	1.54468810078468e-27
TIGAR	0.00181323662737987	0.136612021857924	153.429651264843	3.08584485095232e-35	5.91803325515636e-31
STK39	0.00181323662737987	0.0455373406193078	43.7278960750397	3.77354469791686e-11	7.23690402166495e-07
LARP1B	0.00271985494106981	0.0683060109289618	67.337872443834	2.28744792932955e-16	4.38686763886821e-12
RAB7B	0	0.542805100182149	818.293607682811	5.68534947200198e-180	1.09033632174054e-175
FOXO6	0	0.0938069216757741	106.456001642844	5.85787389460085e-25	1.12342305550655e-20
TBC1D3C	0	0.177595628415301	212.736143748642	3.47483939542131e-48	6.66404699253899e-44
MPV17L	0	0.277777777777778	353.352920942225	7.8886622694592e-79	1.51288765003689e-74
MFNG	0	0.187613843351548	226.099925863946	4.22585656695139e-51	8.10434772409938e-47
MBTPS1	0.000906618313689937	0.340619307832423	446.851201652771	3.49451187349418e-99	6.70177487098714e-95
CDR1	0	0.034608378870674	36.8306813649292	1.28846512335846e-09	2.47101841357685e-05
TRPC4AP	0	0.160291438979964	189.995303833906	3.18680958238681e-43	6.11166341710142e-39
HARS	0	0.0901639344262295	102.046367158732	5.42372800574511e-24	1.0401625569418e-19
RBM41	0	0.0209471766848816	21.366940797415	3.79254652448788e-06	0.0727334572466286
MAFG	0	0.199453551912568	242.084769853836	1.38083141836861e-54	2.64815849414732e-50
CD163L1	0	0.122040072859745	141.21018562702	1.44737799576088e-32	2.77578152027022e-28
ZNF525	0.00181323662737987	0.0865209471766849	91.7188049840125	9.99109233770875e-22	1.91609168852578e-17
NLRP11	0.00181323662737987	0.0910746812386157	97.190887150685	6.29557392322029e-23	1.20736516699519e-18
NR3C2	0.00181323662737987	0.0819672131147541	86.2741023171937	1.56646543231511e-20	3.00416740609392e-16
TMEM98	0	0.180327868852459	216.366251446347	5.61081856856411e-49	1.07604278507922e-44
SPATA31A3	0	0.0655737704918033	72.7159164761831	1.49721726795334e-17	2.87136327648092e-13
PCDHGB7	0.000906618313689937	0.0938069216757741	103.433844431329	2.69235903997965e-24	5.16340616687297e-20
F13B	0	0.519125683060109	770.00295327826	1.79520826904265e-169	3.44285041836999e-165
GJB2	0	0.164845173041894	195.938246853666	1.60783640585821e-44	3.08350865915487e-40
DPY19L1	0.000906618313689937	0.127504553734062	144.979918525834	2.16945808512983e-33	4.16058671566199e-29
PDE2A	0	0.188524590163934	227.322128009628	2.28747516986068e-51	4.38691988075881e-47
GATA5	0	0.252276867030965	316.033903348434	1.05881373692321e-70	2.03059298467133e-66
OSBPL1A	0.000906618313689937	0.112021857923497	125.705587786961	3.56658444719828e-29	6.83999565283686e-25
ZNF630	0	0.040983606557377	44.1247278223639	3.08104059265001e-11	5.90881964858419e-07
ICT1	0	0.216757741347905	265.82814270084	9.20816671396344e-60	1.76594221240391e-55
KRT27	0	0.192167577413479	232.223222489557	1.95211207539101e-52	3.74376053818488e-48
PDE7B	0.00362647325475975	0.167577413479053	187.239137445261	1.2734748427771e-42	2.44227005347792e-38
FAM83E	0.000906618313689937	0.0692167577413479	74.0442306730147	7.63861617715961e-18	1.46493381045567e-13
UBN1	0	0.296903460837887	382.073680739432	4.40039389570668e-85	8.43907541318627e-81
BORA	0	0.188524590163934	227.322128009628	2.28747516986068e-51	4.38691988075881e-47
KCNRG	0	0.197632058287796	239.611925878162	4.77884874024389e-54	9.16487611403973e-50
RNF186	0	0.120218579234973	138.93651861976	4.5475623956484e-32	8.7213151623745e-28
SLC25A32	0.00181323662737987	0.450819672131148	632.000538170693	1.83537037228294e-139	3.51987329996422e-135
MRPL47	0	0.150273224043716	177.02361175084	2.16429268836832e-40	4.15068051775276e-36
NBEAL1	0	0.0510018214936248	55.6851077161429	8.50602136420099e-14	1.63128477722647e-09
NR1H2	0	0.0746812386156648	83.4915931402682	6.39875086724428e-20	1.22715244132011e-15
ZBTB47	0	0.102914389799636	117.554132216331	2.17093427110123e-27	4.16341774511794e-23
CNPY2	0	0.058287795992714	64.1683786751084	1.14227452372695e-15	2.19065408160354e-11
RCE1	0.000906618313689937	0.146630236794171	169.235850234128	1.08659216386792e-38	2.0838664518659e-34
NKAIN2	0.0208522212148685	0.183060109289617	156.605735654757	6.24169552298283e-36	1.19703236739765e-31
TTC21B	0	0.0437158469945355	47.2656407481687	6.19893609935481e-12	1.18883196513427e-07
ST6GAL1	0	0.13023679417122	151.496416345484	8.16374056040252e-35	1.565642164674e-30
KLC3	0	0.0819672131147541	92.1859223559541	7.89040688660219e-22	1.51322223271257e-17
SERPINE1	0	0.107468123861566	123.143214869447	1.29738122602225e-28	2.48811771526547e-24
GPX7	0	0.0828779599271403	93.2773630892577	4.54561443226851e-22	8.71757935820455e-18
SH2D3C	0	0.10200364298725	116.439530497623	3.8081508916268e-27	7.30327177996188e-23
SETDB2	0	0.204007285974499	248.288772562996	6.13066690668012e-56	1.17573929936311e-51
PACSIN1	0.000906618313689937	0.114754098360656	129.083799661527	6.50147060623964e-30	1.24685203286464e-25
TRIM46	0	0.524590163934426	781.009792729663	7.25998753907679e-172	1.39232041024415e-167
KRT12	0	0.183060109289617	220.007252019664	9.01159656574711e-50	1.72824398937898e-45
PACS2	0.000906618313689937	0.111111111111111	124.581704452376	6.28377814898976e-29	1.20510297341326e-24
OR2F2	0.00181323662737987	0.114754098360656	126.088126183025	2.94127504711204e-29	5.64077728535147e-25
ZBTB49	0	0.102914389799636	117.554132216331	2.17093427110123e-27	4.16341774511794e-23
RP1-130H16.18	0	0.18488160291439	222.440661507451	2.65476520024371e-50	5.09130870102739e-46
KLHDC4	0.00181323662737987	0.345173041894353	450.815376009629	4.79366360047645e-100	9.19328805299374e-96
BPTF	0	0.238615664845173	296.484963089047	1.92129630112858e-66	3.68466204630439e-62
FAM73B	0	0.0965391621129326	109.774298314311	1.09807945314936e-25	2.10589677524984e-21
CCDC142	0	0.0482695810564663	52.5203503198579	4.258130438957e-13	8.16624255583173e-09
NPIPA2	0	0.277777777777778	353.352920942225	7.8886622694592e-79	1.51288765003689e-74
OR5M9	0.00181323662737987	0.110200364298725	120.473073501116	4.98386822269985e-28	9.55806247749377e-24
RSPH10B2	0	0.122950819672131	142.348671243786	8.15911456088885e-33	1.56475499048726e-28
KLC2	0	0.1183970856102	136.667246747984	1.42583956641807e-31	2.73447512047657e-27
C16orf90	0	0.277777777777778	353.352920942225	7.8886622694592e-79	1.51288765003689e-74
TNFSF12-TNFSF13	0	0.250455373406193	313.409783122187	3.94856480374679e-70	7.57255758062559e-66
CCDC115	0	0.0437158469945355	47.2656407481687	6.19893609935481e-12	1.18883196513427e-07
TPRG1L	0	0.122950819672131	142.348671243786	8.15911456088885e-33	1.56475499048726e-28
TAAR2	0.000906618313689937	0.163023679417122	190.429530243727	2.56197220082791e-43	4.91335028674777e-39
MAL	0	0.040983606557377	44.1247278223639	3.08104059265001e-11	5.90881964858419e-07
ANKRD37	0	0.112021857923497	128.759226265191	7.65650097941709e-30	1.46836375783261e-25
PFN1	0	0.224043715846995	275.963440166174	5.69186931138351e-62	1.09158669653713e-57
TAMM41	0.000906618313689937	0.0846994535519126	92.4588548073424	6.87391450845508e-22	1.31827932443152e-17
ZNF579	0	0.0910746812386157	103.147198577794	3.11149283476603e-24	5.96722095851429e-20
TMED5	0	0.11384335154827	131.013213586699	2.45963552571946e-30	4.71708901122478e-26
RBM33	0	0.12568306010929	145.770755533448	1.456993559777e-33	2.79422224894033e-29
SERPINA4	0	0.119307832422587	137.801334077567	8.05447961614703e-32	1.54468810078468e-27
WBP4	0.000906618313689937	0.210382513661202	253.83778470636	3.78262202671013e-57	7.25431252282469e-53
ARHGEF17	0	0.191256830601093	230.996102289585	3.61502482846883e-52	6.93289461603752e-48
PIANP	0	0.122950819672131	142.348671243786	8.15911456088885e-33	1.56475499048726e-28
PSD4	0	0.040983606557377	44.1247278223639	3.08104059265001e-11	5.90881964858419e-07
SYK	0	0.0956284153005464	108.667142153936	1.91960691060315e-25	3.68142213315472e-21
KNSTRN	0	0.0974499089253188	110.882513695638	6.27833544390129e-26	1.20405917143139e-21
C1QTNF3	0	0.152094717668488	179.371661410032	6.64681237413468e-41	1.27472567711155e-36
RP11-691N7.6	0.000906618313689937	0.117486338797814	132.471882824996	1.17965670333383e-30	2.26234562565362e-26
ATP5F1	0	0.102914389799636	117.554132216331	2.17093427110123e-27	4.16341774511794e-23
SAMD9L	0	0.104735883424408	119.786545952838	7.04474435619752e-28	1.35104107263156e-23
LGR4	0	0.105646630236794	120.904360975029	4.0100522805236e-28	7.69047826358816e-24
RIMS2	0.00725294650951949	0.458105646630237	624.895293911621	6.44251219101632e-138	1.23554498799311e-133
KCNJ6	0.000906618313689937	0.10200364298725	113.402685030341	1.76116288006631e-26	3.37755817139117e-22
CTDSP2	0	0.0692167577413479	77.0139615651969	1.69753681126104e-18	3.25553609663642e-14
YJEFN3	0	0.0737704918032787	82.4094313553584	1.10624684270184e-19	2.12156019493359e-15
TEK	0.000906618313689937	0.13752276867031	157.623092031646	3.74108619546647e-36	7.1746551056656e-32
MRPL17	0	0.121129326047359	140.072801944905	2.56621872284125e-32	4.92149426666495e-28
CRABP1	0	0.0828779599271403	93.2773630892577	4.54561443226851e-22	8.71757935820455e-18
OR3A2	0	0.226775956284153	279.785597353116	8.36215574788914e-63	1.60369422933018e-58
PARP9	0	0.0837887067395264	94.3698416242314	2.61749973278805e-22	5.01984098754092e-18
MMP28	0	0.175774134790528	210.32209949633	1.16840411080187e-47	2.24076540369583e-43
NR2C2	0.000906618313689937	0.0892531876138433	97.9330531560583	4.32769256628363e-23	8.29964880361875e-19
TRIOBP	0.000906618313689937	0.189435336976321	225.382766435499	6.05797978734358e-51	1.16179936361675e-46
SERF1B	0	0.122950819672131	142.348671243786	8.15911456088885e-33	1.56475499048726e-28
CTD-2369P2.10	0	0.0728597449908925	81.3282939023744	1.91169921745354e-19	3.6662567592324e-15
DIABLO	0	0.0692167577413479	77.0139615651969	1.69753681126104e-18	3.25553609663642e-14
AADACL4	0	0.126593806921676	146.913664738406	8.19604965506095e-34	1.57183840284759e-29
BTBD18	0.000906618313689937	0.117486338797814	132.471882824996	1.17965670333383e-30	2.26234562565362e-26
REPS2	0.00181323662737987	0.0564663023679417	56.2962627110318	6.23337940771856e-14	1.19543750281227e-09
NEK8	0	0.181238615664845	217.578705572081	3.05170577400846e-49	5.85256133339342e-45
PERP	0.00453309156844968	0.165755919854281	181.903272644588	1.86153190601236e-41	3.5700458893505e-37
IGLL5	0	0.170309653916211	203.108741353969	4.37986193634125e-46	8.39969922151525e-42
CTC-360G5.8	0	0.0901639344262295	102.046367158732	5.42372800574511e-24	1.0401625569418e-19
ZDHHC16	0.000906618313689937	0.0828779599271403	90.2765968422046	2.07087698371149e-21	3.97152787936189e-17
MSS51	0	0.0801457194899818	90.0061487775805	2.37421005152881e-21	4.55326003682195e-17
DNTTIP1	0	0.195810564663024	237.144063322044	1.64984231430104e-53	3.16406759036653e-49
SNX33	0	0.0801457194899818	90.0061487775805	2.37421005152881e-21	4.55326003682195e-17
LILRB4	0.00181323662737987	0.0846994535519126	89.5376366076596	3.00860098846967e-21	5.76989497568713e-17
EBNA1BP2	0	0.0974499089253188	110.882513695638	6.27833544390129e-26	1.20405917143139e-21
HMX1	0	0.102914389799636	117.554132216331	2.17093427110123e-27	4.16341774511794e-23
IL20RA	0.000906618313689937	0.167577413479053	196.384037761036	1.28514170283418e-44	2.46464475769539e-40
MRPL24	0	0.514571948998178	760.892259856589	1.7181247037938e-167	3.29501955693575e-163
FAM231C	0	0.121129326047359	140.072801944905	2.56621872284125e-32	4.92149426666495e-28
TBC1D3H	0	0.171220400728597	204.307980749416	2.39763345597014e-46	4.59818144185953e-42
ZBTB2	0	0.167577413479053	199.518159982608	2.66060738906744e-45	5.10251285075354e-41
RABGEF1	0	0.0819672131147541	92.1859223559541	7.89040688660219e-22	1.51322223271257e-17
IFT20	0	0.167577413479053	199.518159982608	2.66060738906744e-45	5.10251285075354e-41
TNP2	0	0.298724954462659	384.842581823638	1.09817713632984e-85	2.10608411205337e-81
CXXC5	0	0.092896174863388	105.352014377528	1.02256423556152e-24	1.96107369095988e-20
MPC2	0	0.524590163934426	781.009792729663	7.25998753907679e-172	1.39232041024415e-167
NRG4	0	0.0819672131147541	92.1859223559541	7.89040688660219e-22	1.51322223271257e-17
AC009758.1	0.000906618313689937	0.115664845173042	130.212062081493	3.68256890395114e-30	7.0624306439975e-26
ITGAX	0	0.264116575591985	333.224578670884	1.90756787381081e-74	3.65833366839437e-70
MBOAT4	0	0.336065573770492	442.937414667633	2.48402724582828e-98	4.76386745204948e-94
TEDDM1	0	0.520036429872495	771.831799265613	7.18575108790521e-170	1.37808334363846e-165
DNHD1	0.000906618313689937	0.122040072859745	138.14072582529	6.78910969590913e-32	1.30201545748145e-27
CDH26	0.000906618313689937	0.253187613843352	314.105246888351	2.78575508099916e-70	5.34252109434019e-66
TRPM4	0.000906618313689937	0.0728597449908925	78.349685270707	8.63231069355257e-19	1.65550454480951e-14
MYL4	0	0.166666666666667	198.323672587943	4.84899325511854e-45	9.29939926466634e-41
DPP4	0.000906618313689937	0.0428051001821494	43.3375356339474	4.60661322496216e-11	8.83456284283243e-07
MTFP1	0	0.183970856102004	221.22334797327	4.89264258550011e-50	9.38310995047211e-46
CD99L2	0	0.0455373406193078	49.3645448126526	2.12552672855212e-12	4.07633516001726e-08
EPB41L4A	0.00453309156844968	0.117486338797814	120.818713571498	4.18696725525853e-28	8.02976580213481e-24
THAP8	0.000906618313689937	0.0910746812386157	100.130171930813	1.42702971503132e-23	2.73675758748707e-19
TAS2R9	0	0.122040072859745	141.21018562702	1.44737799576088e-32	2.77578152027022e-28
KCNJ1	0.000906618313689937	0.237704918032787	291.968800591035	1.85172889687965e-65	3.55124567843579e-61
ATP6V0A2	0	0.0783242258652095	87.8305099254412	7.13104526287773e-21	1.36759186051469e-16
CD163	0	0.119307832422587	137.801334077567	8.05447961614703e-32	1.54468810078468e-27
CPLX3	0	0.0819672131147541	92.1859223559541	7.89040688660219e-22	1.51322223271257e-17
GOLPH3	0	0.14936247723133	175.851316688379	3.90214593442377e-40	7.48353547303791e-36
C11orf71	0	0.260473588342441	327.910279328955	2.74116784008377e-73	5.25701168371265e-69
SLAMF6	0	0.540072859744991	812.641909644109	9.62740194068653e-179	1.84634314418486e-174
ZMIZ1	0.00543970988213962	0.110200364298725	109.147782308145	1.50626410876037e-25	2.88871330778064e-21
TRIM47	0	0.213114754098361	260.791413895083	1.15347397770304e-58	2.21213239443889e-54
ZC3H7B	0	0.189435336976321	228.545556899213	1.2374756313606e-51	2.37323076582336e-47
NCKIPSD	0	0.111111111111111	127.633860551138	1.34982661394651e-29	2.58869748022662e-25
PRDM4	0	0.0728597449908925	81.3282939023744	1.91169921745354e-19	3.6662567592324e-15
TREM2	0.00181323662737987	0.126593806921676	140.817644067979	1.76367059032431e-32	3.38236745812396e-28
KAZALD1	0	0.0828779599271403	93.2773630892577	4.54561443226851e-22	8.71757935820455e-18
OR6C6	0	0.0601092896174863	66.2992171524673	3.87412500579613e-16	7.42979693611582e-12
LRRC10B	0	0.1183970856102	136.667246747984	1.42583956641807e-31	2.73447512047657e-27
GPR65	0	0.112021857923497	128.759226265191	7.65650097941709e-30	1.46836375783261e-25
ACOT1	0.000906618313689937	0.112932604735883	126.830563870709	2.02330747296001e-29	3.88029907164271e-25
TMEM218	0	0.251366120218579	314.721161591257	2.04538958150731e-70	3.92264813941472e-66
FAP	0	0.0400728597449909	43.0797413251017	5.25536188251263e-11	1.00787330182827e-06
PSAPL1	0	0.111111111111111	127.633860551138	1.34982661394651e-29	2.58869748022662e-25
HIST1H4A	0	0.122040072859745	141.21018562702	1.44737799576088e-32	2.77578152027022e-28
CENPQ	0.000906618313689937	0.116575591985428	131.341422675893	2.08480641669571e-30	3.99824174593903e-26
RP11-507M3.1	0	0.0555555555555556	60.9796487259987	5.766787445985e-15	1.105954496391e-10
CTSE	0.00362647325475975	0.550091074681239	819.138019633201	3.72539237518461e-180	7.14455749712905e-176
XPO7	0	0.34608378870674	458.968929962219	8.05880142320077e-102	1.54551693694144e-97
CACNA2D4	0.00181323662737987	0.141165755919854	159.207896454783	1.68545058881627e-36	3.23235713923184e-32
INO80B-WBP1	0	0.0482695810564663	52.5203503198579	4.258130438957e-13	8.16624255583173e-09
TRHDE	0.00181323662737987	0.10655737704918	116.000957239503	4.75067178602549e-27	9.11083835123968e-23
MMRN1	0	0.0746812386156648	83.4915931402682	6.39875086724428e-20	1.22715244132011e-15
SLITRK6	0	0.181238615664845	217.578705572081	3.05170577400846e-49	5.85256133339342e-45
MINK1	0	0.222222222222222	273.421846359346	2.03774484228314e-61	3.90798705853061e-57
MTOR	0	0.122950819672131	142.348671243786	8.15911456088885e-33	1.56475499048726e-28
SSX4B	0	0.040983606557377	44.1247278223639	3.08104059265001e-11	5.90881964858419e-07
ZNF519	0.000906618313689937	0.129326047358834	147.26856793209	6.85521829911746e-34	1.31469376540475e-29
MTL5	0	0.201275045537341	244.562610320648	3.98007225133471e-55	7.63298256360971e-51
ZNF804A	0.00181323662737987	0.046448087431694	44.7682987901037	2.21784531615683e-11	4.25338374732557e-07
SLC16A5	0	0.216757741347905	265.82814270084	9.20816671396344e-60	1.76594221240391e-55
TRAPPC2L	0	0.336976320582878	444.386865275091	1.20145053056131e-98	2.30414182751048e-94
SPAG11B	0	0.341530054644809	451.657932555487	3.14271530801702e-100	6.02709941771504e-96
NLGN1	0.00453309156844968	0.164845173041894	180.719516248035	3.3753780679328e-41	6.47330005868152e-37
S100A1	0	0.509107468123862	750.032668895582	3.94728223910523e-165	7.57009787815601e-161
FOS	0.000906618313689937	0.115664845173042	130.212062081493	3.68256890395114e-30	7.0624306439975e-26
SHTN1	0.000906618313689937	0.092896174863388	102.331553025679	4.69651688645463e-24	9.00698008484269e-20
DEPDC4	0	0.0792349726775956	88.9178131914755	4.11560709029152e-21	7.89291127776108e-17
RRP9	0	0.112021857923497	128.759226265191	7.65650097941709e-30	1.46836375783261e-25
CXCR4	0	0.0455373406193078	49.3645448126526	2.12552672855212e-12	4.07633516001726e-08
AK5	0.000906618313689937	0.104735883424408	116.745007665415	3.26453292695244e-27	6.26072124730939e-23
TOPBP1	0	0.0910746812386157	103.147198577794	3.11149283476603e-24	5.96722095851429e-20
TAF1A	0.000906618313689937	0.543715846994536	816.586820304331	1.33608358769401e-179	2.56234110447957e-175
EXOC5	0	0.10200364298725	116.439530497623	3.8081508916268e-27	7.30327177996188e-23
INPP5F	0	0.10200364298725	116.439530497623	3.8081508916268e-27	7.30327177996188e-23
SHD	0	0.0819672131147541	92.1859223559541	7.89040688660219e-22	1.51322223271257e-17
CEP128	0.00634632819582956	0.124772313296903	124.281000197461	7.31197323279036e-29	1.40229022658454e-24
FAM19A1	0.00725294650951949	0.117486338797814	112.668963954746	2.54982659061647e-26	4.89005743548427e-22
FAM127C	0	0.0282331511839709	29.585568399315	5.35018024761541e-08	0.00102605756788768
ARID4B	0	0.540983606557377	814.52346436081	3.75347669361347e-179	7.19841760301191e-175
CACNA1F	0	0.040983606557377	44.1247278223639	3.08104059265001e-11	5.90881964858419e-07
LAYN	0	0.258652094717668	325.261446830304	1.03483925186344e-72	1.98461471722371e-68
CDK6	0.00181323662737987	0.111111111111111	121.593867001345	2.83276421697181e-28	5.43267521530854e-24
OR13C3	0	0.0910746812386157	103.147198577794	3.11149283476603e-24	5.96722095851429e-20
STEAP2	0	0.102914389799636	117.554132216331	2.17093427110123e-27	4.16341774511794e-23
AK8	0	0.0974499089253188	110.882513695638	6.27833544390129e-26	1.20405917143139e-21
GXYLT2	0.000906618313689937	0.110200364298725	123.458912535907	1.10654078262404e-28	2.12212391291638e-24
HMOX2	0	0.285063752276867	364.218821933426	3.39595760078414e-81	6.51276748678382e-77
TEX13D	0	0.0209471766848816	21.366940797415	3.79254652448788e-06	0.0727334572466286
SPG21	0	0.0774134790528233	86.7442376274021	1.2350313019115e-20	2.36854303080587e-16
PARP6	0	0.0801457194899818	90.0061487775805	2.37421005152881e-21	4.55326003682195e-17
HECW2	0.00181323662737987	0.0510018214936248	49.9896960018652	1.54555467425814e-12	2.96406475429226e-08
LTBP2	0.000906618313689937	0.119307832422587	134.736107353665	3.7710173000143e-31	7.23205697796743e-27
CEP104	0.00271985494106981	0.123861566484517	134.444181161445	4.36831283399415e-31	8.37755035303398e-27
COX11	0	0.221311475409836	272.15299677126	3.85194220243342e-61	7.38725475582681e-57
ABI1	0.000906618313689937	0.0974499089253188	107.853706795792	2.8936786217746e-25	5.54949686083933e-21
MRPS15	0	0.0910746812386157	103.147198577794	3.11149283476603e-24	5.96722095851429e-20
HAS2	0.00181323662737987	0.457194899817851	643.726893763822	5.16890168040748e-142	9.91291964268547e-138
LRRC26	0	0.10655737704918	122.023250109717	2.28148539532661e-28	4.37543269115737e-24
ZC3H7A	0	0.301457194899818	389.00703916703	1.36159119081243e-86	2.61125958574008e-82
GAS2L2	0	0.174863387978142	209.116880247315	2.14061908388868e-47	4.10527927908171e-43
FAM65B	0.0154125113327289	0.14207650273224	120.153519779266	5.85496487972321e-28	1.12286516463332e-23
GPR151	0	0.092896174863388	105.352014377528	1.02256423556152e-24	1.96107369095988e-20
TTC23	0.000906618313689937	0.129326047358834	147.26856793209	6.85521829911746e-34	1.31469376540475e-29
APOBEC3G	0.00181323662737987	0.183970856102004	214.951558712832	1.14191662645399e-48	2.18996770621346e-44
TMEM47	0	0.0428051001821494	46.2176775244843	1.05817914336377e-11	2.02937596114304e-07
GSE1	0	0.342440801457195	453.116927126016	1.51283350993245e-100	2.90131210534845e-96
CT47A10	0	0.0218579234972678	22.3905523592203	2.22465661848974e-06	0.0426644646293962
PTPN6	0	0.127504553734062	148.057683820901	4.60809811805662e-34	8.83741057080899e-30
RWDD3	0	0.112021857923497	128.759226265191	7.65650097941709e-30	1.46836375783261e-25
HPGDS	0.00181323662737987	0.0737704918032787	76.5428381420008	2.15487538550853e-18	4.13262001432826e-14
FST	0	0.126593806921676	146.913664738406	8.19604965506095e-34	1.57183840284759e-29
CELF4	0.00362647325475975	0.112021857923497	116.921639994739	2.98636532039788e-27	5.72725141145905e-23
SURF2	0	0.0983606557377049	111.991789767092	3.58792930267723e-26	6.88093081667439e-22
RHBDL2	0	0.092896174863388	105.352014377528	1.02256423556152e-24	1.96107369095988e-20
NCR3	0	0.110200364298725	126.509578085074	2.37850986762151e-29	4.56150622412453e-25
SFT2D2	0	0.525500910746812	782.852173233893	2.88640781205223e-172	5.53555290195377e-168
TUBD1	0	0.251366120218579	314.721161591257	2.04538958150731e-70	3.92264813941472e-66
CMC4	0	0.0391621129326047	42.035747263585	8.96200231858492e-11	1.71873280465822e-06
OS9	0.000906618313689937	0.0673952641165756	71.8978178303321	2.26634432232895e-17	4.34639514136246e-13
LEP	0	0.109289617486339	125.386377334497	4.18901417741995e-29	8.03369138945598e-25
CRYGS	0	0.126593806921676	146.913664738406	8.19604965506095e-34	1.57183840284759e-29
TTC7B	0	0.112021857923497	128.759226265191	7.65650097941709e-30	1.46836375783261e-25
HPCA	0	0.0938069216757741	106.456001642844	5.85787389460085e-25	1.12342305550655e-20
SRSF7	0	0.0546448087431694	59.918742117791	9.88555887170373e-15	1.89585248041534e-10
PRDM16	0.000906618313689937	0.138433515482696	158.779241482876	2.09110368498317e-36	4.01031864706072e-32
SLC26A9	0	0.54735883424408	827.760202156689	4.9730249206283e-182	9.53726719278095e-178
ITFG2	0	0.132969034608379	154.945195560807	1.43936270435889e-35	2.76040979441948e-31
TP53TG3C	0.000906618313689937	0.0901639344262295	99.0310802395469	2.48569926082112e-23	4.76707404240274e-19
ASB11	0	0.0528233151183971	57.7999282715382	2.90180302459607e-14	5.56507784057034e-10
REG4	0.000906618313689937	0.124772313296903	141.555316524249	1.2165078323951e-32	2.33301872096732e-28
SIGLECL1	0	0.0810564663023679	91.0955180434138	1.36901417587232e-21	2.62549538648794e-17
BCAT1	0	0.105646630236794	120.904360975029	4.0100522805236e-28	7.69047826358816e-24
MPZL3	0	0.252276867030965	316.033903348434	1.05881373692321e-70	2.03059298467133e-66
EBI3	0.000906618313689937	0.0801457194899818	87.011142181804	1.07911517927719e-20	2.06952709081779e-16
SCYL2	0.000906618313689937	0.0792349726775956	85.9247698870666	1.86912805193873e-20	3.5846137780081e-16
MROH7-TTC4	0.00453309156844968	0.0901639344262295	87.7324318300943	7.49355608725238e-21	1.43711418641326e-16
TMEM71	0.00271985494106981	0.450819672131148	628.550642860691	1.03286559073e-138	1.98082962990199e-134
MTPAP	0.000906618313689937	0.0947176684881603	104.537204446955	1.54269335559956e-24	2.95857731736884e-20
IQCC	0	0.0901639344262295	102.046367158732	5.42372800574511e-24	1.0401625569418e-19
TET2	0	0.0783242258652095	87.8305099254412	7.13104526287773e-21	1.36759186051469e-16
GABPB1	0.00271985494106981	0.0938069216757741	97.6141779213504	5.08386112665513e-23	9.74982886869921e-19
TMEM243	0	0.107468123861566	123.143214869447	1.29738122602225e-28	2.48811771526547e-24
TMC7	0.000906618313689937	0.285974499089253	362.300630892869	8.88449139318327e-81	1.70386775938469e-76
AC069499.1	0	0.0746812386156648	83.4915931402682	6.39875086724428e-20	1.22715244132011e-15
SIGMAR1	0	0.116575591985428	134.402357463757	4.46130818695154e-31	8.55589684093566e-27
USP17L19	0	0.102914389799636	117.554132216331	2.17093427110123e-27	4.16341774511794e-23
BORCS7	0	0.0919854280510018	104.249080504143	1.78415788957303e-24	3.42165800062316e-20
EYA2	0.00362647325475975	0.211293260473588	245.724478551013	2.22112768443077e-55	4.25967867320133e-51
R3HDM2	0	0.058287795992714	64.1683786751084	1.14227452372695e-15	2.19065408160354e-11
PODN	0	0.0828779599271403	93.2773630892577	4.54561443226851e-22	8.71757935820455e-18
TRANK1	0	0.0919854280510018	104.249080504143	1.78415788957303e-24	3.42165800062316e-20
ATP9A	0.00181323662737987	0.243169398907104	296.537042385059	1.87174889073082e-66	3.58964002264357e-62
FOXR2	0	0.0491803278688525	53.5742739679222	2.48998750100034e-13	4.77529802941845e-09
TRMT10A	0	0.075591985428051	84.5747805666215	3.69954185087099e-20	7.09498136160038e-16
RPS15	0	0.101092896174863	115.325996882723	6.67677841881049e-27	1.28047256515948e-22
KIAA1143	0	0.10200364298725	116.439530497623	3.8081508916268e-27	7.30327177996188e-23
CACNG1	0	0.228597449908925	282.340236480581	2.32073475073888e-63	4.45070510496702e-59
NBPF3	0.00453309156844968	0.123861566484517	128.694549074259	7.91010568538803e-30	1.51700006834372e-25
GLUL	0.000906618313689937	0.520036429872495	768.264939638432	4.28557526938627e-169	8.21887625162899e-165
CBWD5	0	0.0655737704918033	72.7159164761831	1.49721726795334e-17	2.87136327648092e-13
ZNF8	0	0.0892531876138433	100.946584812457	9.44977196481201e-24	1.81227726741165e-19
GRPEL2	0	0.0901639344262295	102.046367158732	5.42372800574511e-24	1.0401625569418e-19
GPR160	0	0.159380692167577	188.810236404934	5.78142531668859e-43	1.10876174723454e-38
MSMO1	0	0.0883424408014572	99.8478501098372	1.64565900586024e-23	3.15604484143877e-19
VCPKMT	0	0.102914389799636	117.554132216331	2.17093427110123e-27	4.16341774511794e-23
PRDM14	0.00181323662737987	0.373406193078324	496.933942629005	4.41658465305009e-110	8.47012604761946e-106
CST3	0	0.158469945355191	187.62633866331	1.04825458709507e-42	2.01034264713093e-38
PEX19	0	0.53551912568306	803.269131076298	1.05025554097923e-176	2.01418007648997e-172
SMCO4	0	0.228597449908925	282.340236480581	2.32073475073888e-63	4.45070510496702e-59
MTO1	0	0.146630236794171	172.341330326104	2.27937899265057e-39	4.37139303210526e-35
POLD2	0	0.116575591985428	134.402357463757	4.46130818695154e-31	8.55589684093566e-27
CMC1	0	0.0846994535519126	95.4633593484203	1.50654005036232e-22	2.88924250858486e-18
PPFIA2	0.00543970988213962	0.0947176684881603	90.5010819586284	1.84875773140331e-21	3.54554757728527e-17
IGF2BP3	0.00181323662737987	0.133879781420765	149.976401508934	1.7543563092108e-34	3.36450452980447e-30
EZH2	0	0.124772313296903	144.628954610224	2.58869796121445e-33	4.96460495001707e-29
OR5M10	0.000906618313689937	0.111111111111111	124.581704452376	6.28377814898976e-29	1.20510297341326e-24
HTN3	0.000906618313689937	0.0801457194899818	87.011142181804	1.07911517927719e-20	2.06952709081779e-16
CYB5A	0.000906618313689937	0.147540983606557	170.403420619122	6.0402650684939e-39	1.15840203483576e-34
TLR9	0	0.115664845173042	133.271552386961	7.88536310772085e-31	1.5122549367987e-26
KLK8	0	0.0783242258652095	87.8305099254412	7.13104526287773e-21	1.36759186051469e-16
HOXD11	0	0.0400728597449909	43.0797413251017	5.25536188251263e-11	1.00787330182827e-06
PAIP2B	0	0.0428051001821494	46.2176775244843	1.05817914336377e-11	2.02937596114304e-07
GCNT2	0	0.157559198542805	186.443608885751	1.89955610505757e-42	3.64296869827941e-38
KCNJ5	0.000906618313689937	0.237704918032787	291.968800591035	1.85172889687965e-65	3.55124567843579e-61
OR51G1	0	0.1183970856102	136.667246747984	1.42583956641807e-31	2.73447512047657e-27
ZBED5	0	0.120218579234973	138.93651861976	4.5475623956484e-32	8.7213151623745e-28
CCDC107	0	0.111111111111111	127.633860551138	1.34982661394651e-29	2.58869748022662e-25
DSCAML1	0.00271985494106981	0.258652094717668	315.59830598472	1.31736454657839e-70	2.52644172742804e-66
C6orf226	0	0.126593806921676	146.913664738406	8.19604965506095e-34	1.57183840284759e-29
CDCA2	0	0.348816029143898	463.374831902094	8.86084884483053e-103	1.6993335914616e-98
BCAS4	0.000906618313689937	0.234972677595628	288.102632234696	1.28819076096165e-64	2.47049224137225e-60
PARP16	0	0.0765027322404372	85.6589949531454	2.13800743610054e-20	4.10027066095362e-16
CNNM2	0	0.092896174863388	105.352014377528	1.02256423556152e-24	1.96107369095988e-20
TXNDC15	0	0.0947176684881603	107.561043750022	3.354137196678e-25	6.43256431578907e-21
MEP1A	0	0.122950819672131	142.348671243786	8.15911456088885e-33	1.56475499048726e-28
DNAAF1	0.000906618313689937	0.341530054644809	448.307493970709	1.68443109411571e-99	3.23040195229511e-95
PDZD8	0.000906618313689937	0.092896174863388	102.331553025679	4.69651688645463e-24	9.00698008484269e-20
ZNF135	0.000906618313689937	0.0938069216757741	103.433844431329	2.69235903997965e-24	5.16340616687297e-20
SIRPB2	0.000906618313689937	0.159380692167577	185.687155899833	2.77835271028052e-42	5.32832482777598e-38
SYNGR1	0.00181323662737987	0.182149362477231	212.525706765337	3.86227753636151e-48	7.4070758592341e-44
PRR23D2	0	0.341530054644809	451.657932555487	3.14271530801702e-100	6.02709941771504e-96
CCKBR	0	0.122040072859745	141.21018562702	1.44737799576088e-32	2.77578152027022e-28
SIRT2	0.000906618313689937	0.0919854280510018	101.230329196254	8.18858783137814e-24	1.5704073743017e-19
APLP2	0.000906618313689937	0.240437158469945	295.846961116105	2.64605817177479e-66	5.07461036182969e-62
CLDN15	0	0.10655737704918	122.023250109717	2.28148539532661e-28	4.37543269115737e-24
POLD3	0.00634632819582956	0.210382513661202	235.417150006374	3.92654718934829e-53	7.53033219973215e-49
CEP164	0	0.255009107468124	319.980329627209	1.46280310659478e-71	2.80536379782747e-67
LTBP4	0	0.0810564663023679	91.0955180434138	1.36901417587232e-21	2.62549538648794e-17
NDST1	0	0.092896174863388	105.352014377528	1.02256423556152e-24	1.96107369095988e-20
MRPL19	0	0.0482695810564663	52.5203503198579	4.258130438957e-13	8.16624255583173e-09
NPIPB9	0	0.256830601092896	322.61813600895	3.89602447387879e-72	7.47179573600474e-68
GNG13	0	0.284153005464481	362.855550862918	6.72670990102971e-81	1.29004842481948e-76
CD3G	0	0.254098360655738	318.663485234103	2.83155477801808e-71	5.43035575328307e-67
GPR82	0	0.0391621129326047	42.035747263585	8.96200231858492e-11	1.71873280465822e-06
SMG7	0	0.530965391621129	793.954281017166	1.11305201294598e-174	2.1346111504278e-170
MT1X	0	0.308743169398907	400.177867061998	5.03750222048366e-89	9.66092175844356e-85
C20orf85	0	0.259562841530055	326.585171789791	5.32786319702367e-73	1.0217776039252e-68
CHST15	0	0.103825136612022	118.669803534703	1.23698351594154e-27	2.37228698687269e-23
CLDN7	0	0.248633879781421	310.791107567942	1.46854727229749e-69	2.81637995881213e-65
CPN1	0	0.0846994535519126	95.4633593484203	1.50654005036232e-22	2.88924250858486e-18
FADD	0	0.262295081967213	330.564650814913	7.24112376980906e-74	1.38870271657398e-69
ABAT	0.000906618313689937	0.306010928961749	392.670271166662	2.17050611863422e-87	4.16259663431671e-83
AC087651.1	0	0.218579234972678	268.35421345888	2.59182244052439e-60	4.97059707643767e-56
PPP2R3C	0.000906618313689937	0.111111111111111	124.581704452376	6.28377814898976e-29	1.20510297341326e-24
DCLRE1B	0.000906618313689937	0.10200364298725	113.402685030341	1.76116288006631e-26	3.37755817139117e-22
ZNF136	0	0.0701275045537341	78.0910145866485	9.84005435570406e-19	1.88712562433692e-14
CDKL5	0	0.058287795992714	64.1683786751084	1.14227452372695e-15	2.19065408160354e-11
CYP1A2	0	0.0801457194899818	90.0061487775805	2.37421005152881e-21	4.55326003682195e-17
FAM229A	0	0.0901639344262295	102.046367158732	5.42372800574511e-24	1.0401625569418e-19
UBXN8	0.000906618313689937	0.332422586520947	433.816015399155	2.4007174438656e-96	4.60409591384545e-92
CRAMP1	0	0.283242258652095	361.493722483988	1.33147197982358e-80	2.55349696290566e-76
EIF3L	0	0.190346083788707	229.770214376631	6.69044652470353e-52	1.28309383450764e-47
CPB1	0.000906618313689937	0.120218579234973	135.869874538388	2.13044571827045e-31	4.08576879849907e-27
AL360294.1	0	0.54735883424408	827.760202156689	4.9730249206283e-182	9.53726719278095e-178
TNFRSF13C	0	0.191256830601093	230.996102289585	3.61502482846883e-52	6.93289461603752e-48
ANGPTL4	0	0.0701275045537341	78.0910145866485	9.84005435570406e-19	1.88712562433692e-14
BTBD19	0	0.0837887067395264	94.3698416242314	2.61749973278805e-22	5.01984098754092e-18
PPP4R4	0.00271985494106981	0.122040072859745	132.176929732453	1.3686136308677e-30	2.62472722127807e-26
TPRKB	0	0.0455373406193078	49.3645448126526	2.12552672855212e-12	4.07633516001726e-08
RPS6KA5	0.000906618313689937	0.112932604735883	126.830563870709	2.02330747296001e-29	3.88029907164271e-25
INPP5E	0.000906618313689937	0.110200364298725	123.458912535907	1.10654078262404e-28	2.12212391291638e-24
FOXD4L3	0	0.0655737704918033	72.7159164761831	1.49721726795334e-17	2.87136327648092e-13
PHLDB2	0.000906618313689937	0.0819672131147541	89.1870550166065	3.59191657425573e-21	6.88857760610764e-17
PTPN12	0	0.0919854280510018	104.249080504143	1.78415788957303e-24	3.42165800062316e-20
TSHZ1	0.000906618313689937	0.154826958105647	179.785550659947	5.39813148766508e-41	1.03525365670441e-36
FAM78A	0	0.0965391621129326	109.774298314311	1.09807945314936e-25	2.10589677524984e-21
TYW1	0.00181323662737987	0.0828779599271403	87.3608507414719	9.04227023921914e-21	1.73412658647745e-16
ARNT2	0.00271985494106981	0.0947176684881603	98.7121378452918	2.92006837986163e-23	5.60010713889863e-19
TBKBP1	0	0.173952641165756	207.912860530864	3.91950364831922e-47	7.5168240967466e-43
MBD3L1	0	0.0728597449908925	81.3282939023744	1.91169921745354e-19	3.6662567592324e-15
CLCA1	0	0.111111111111111	127.633860551138	1.34982661394651e-29	2.58869748022662e-25
PDCD11	0	0.0901639344262295	102.046367158732	5.42372800574511e-24	1.0401625569418e-19
OR7D4	0	0.0710382513661202	79.1690868026161	5.70152621815275e-19	1.09343869811733e-14
GPC3	0.00271985494106981	0.0318761384335155	25.8774165761697	3.63800560214834e-07	0.00697696714380009
BBS10	0	0.0837887067395264	94.3698416242314	2.61749973278805e-22	5.01984098754092e-18
FICD	0	0.0737704918032787	82.4094313553584	1.10624684270184e-19	2.12156019493359e-15
ZFP2	0.000906618313689937	0.111111111111111	124.581704452376	6.28377814898976e-29	1.20510297341326e-24
ZC3H15	0	0.0446265938069217	48.3145964197624	3.63039809481072e-12	6.962377466228e-08
RRS1	0.00181323662737987	0.36976320582878	490.893497861797	9.10746516422001e-109	1.74662966919411e-104
SVIP	0	0.117486338797814	135.53425506436	2.52277621816039e-31	4.838180231188e-27
CYP2C9	0	0.0765027322404372	85.6589949531454	2.13800743610054e-20	4.10027066095362e-16
HERC5	0	0.0728597449908925	81.3282939023744	1.91169921745354e-19	3.6662567592324e-15
PDE6A	0.000906618313689937	0.092896174863388	102.331553025679	4.69651688645463e-24	9.00698008484269e-20
ZSCAN16	0	0.112932604735883	129.885676763625	4.34071682148543e-30	8.32462672024476e-26
TBPL2	0	0.104735883424408	119.786545952838	7.04474435619752e-28	1.35104107263156e-23
ZNF547	0	0.0892531876138433	100.946584812457	9.44977196481201e-24	1.81227726741165e-19
COCH	0	0.108378870673953	124.264256770829	7.37393296826173e-29	1.41417286465323e-24
ICK	0	0.124772313296903	144.628954610224	2.58869796121445e-33	4.96460495001707e-29
ISL1	0	0.120218579234973	138.93651861976	4.5475623956484e-32	8.7213151623745e-28
GOLGA8O	0	0.104735883424408	119.786545952838	7.04474435619752e-28	1.35104107263156e-23
CHCHD3	0	0.11384335154827	131.013213586699	2.45963552571946e-30	4.71708901122478e-26
PDZD2	0.00453309156844968	0.158469945355191	172.467190717294	2.13958511747637e-39	4.10329633829618e-35
PGR	0.00362647325475975	0.234972677595628	278.628275305444	1.49458731033013e-62	2.86631954375112e-58
CCDC109B	0	0.075591985428051	84.5747805666215	3.69954185087099e-20	7.09498136160038e-16
AGBL3	0.00181323662737987	0.11384335154827	124.962896687678	5.18552610721905e-29	9.94480196842469e-25
UBTD1	0	0.0846994535519126	95.4633593484203	1.50654005036232e-22	2.88924250858486e-18
MTRNR2L6	0	0.108378870673953	124.264256770829	7.37393296826173e-29	1.41417286465323e-24
RP1-34B20.21	0	0.116575591985428	134.402357463757	4.46130818695154e-31	8.55589684093566e-27
ALS2CL	0	0.112021857923497	128.759226265191	7.65650097941709e-30	1.46836375783261e-25
FOXD2	0	0.0837887067395264	94.3698416242314	2.61749973278805e-22	5.01984098754092e-18
RFXANK	0	0.0765027322404372	85.6589949531454	2.13800743610054e-20	4.10027066095362e-16
CRNN	0	0.519125683060109	770.00295327826	1.79520826904265e-169	3.44285041836999e-165
CYP4F12	0	0.0737704918032787	82.4094313553584	1.10624684270184e-19	2.12156019493359e-15
H2AFZ	0	0.075591985428051	84.5747805666215	3.69954185087099e-20	7.09498136160038e-16
FOXO3	0	0.198542805100182	240.847724248026	2.56959768063844e-54	4.9279744319284e-50
SUSD1	0.000906618313689937	0.0983606557377049	108.96135198942	1.65481198751618e-25	3.17359842965853e-21
PLEKHG1	0.00453309156844968	0.167577413479053	184.274436339605	5.65192584594476e-42	1.08392633873529e-37
MYO1C	0	0.234061930783242	290.035696001096	4.88403178006783e-65	9.36659614781408e-61
FLYWCH2	0	0.283242258652095	361.493722483988	1.33147197982358e-80	2.55349696290566e-76
NGDN	0.00271985494106981	0.102914389799636	108.644709516396	1.94145590772915e-25	3.72332413984296e-21
HS3ST2	0	0.273224043715847	346.608177031537	2.32149233031688e-77	4.45215799108171e-73
TMEM79	0	0.513661202185792	759.07679979462	4.26377416491213e-167	8.17706609346848e-163
NKAIN1	0	0.0965391621129326	109.774298314311	1.09807945314936e-25	2.10589677524984e-21
DUSP26	0	0.31511839708561	410.031383555666	3.60823717977266e-91	6.91987726336801e-87
RAD21	0.00271985494106981	0.462659380692168	650.390255203273	1.83754673078412e-143	3.52404712029779e-139
FGF11	0	0.247723132969035	309.483806253591	2.8292695272888e-69	5.42597309943446e-65
FAM65A	0	0.308743169398907	400.177867061998	5.03750222048366e-89	9.66092175844356e-85
RP11-613M10.9	0.00362647325475975	0.115664845173042	121.399376070104	3.12453723757587e-28	5.992237514223e-24
RAPGEF6	0	0.105646630236794	120.904360975029	4.0100522805236e-28	7.69047826358816e-24
CALR3	0	0.0673952641165756	74.8629080910529	5.04560938683949e-18	9.67646968208077e-14
PTPRE	0.00271985494106981	0.107468123861566	114.202362633528	1.17666157513084e-26	2.25660156878592e-22
FBXO39	0	0.244990892531876	305.570022878883	2.01505770190249e-68	3.8644776607086e-64
CNEP1R1	0	0.302367941712204	390.398162644279	6.77948780163055e-87	1.30017017059671e-82
DHRS7	0	0.105646630236794	120.904360975029	4.0100522805236e-28	7.69047826358816e-24
INO80D	0.000906618313689937	0.0455373406193078	46.4718635652686	9.29434962322706e-12	1.78247037074249e-07
ANKRD28	0.000906618313689937	0.0865209471766849	94.6453502618533	2.27740576303999e-22	4.36760877235809e-18
EML3	0	0.109289617486339	125.386377334497	4.18901417741995e-29	8.03369138945598e-25
HPGD	0	0.0947176684881603	107.561043750022	3.354137196678e-25	6.43256431578907e-21
SLC17A2	0	0.123861566484517	143.488260376533	4.59701946479677e-33	8.81616392958725e-29
UBE2V2	0.00181323662737987	0.322404371584699	414.752605532613	3.38548311431773e-92	6.49267951663854e-88
DEFB110	0.000906618313689937	0.115664845173042	130.212062081493	3.68256890395114e-30	7.0624306439975e-26
NT5DC1	0.00271985494106981	0.181238615664845	208.242295441016	3.32165577781746e-47	6.37027145069832e-43
ANKRD62	0.000906618313689937	0.138433515482696	158.779241482876	2.09110368498317e-36	4.01031864706072e-32
GALNT13	0.00181323662737987	0.0500910746812386	48.9428823833309	2.63525798560845e-12	5.05389776479988e-08
NMRAL1	0	0.284153005464481	362.855550862918	6.72670990102971e-81	1.29004842481948e-76
SNAPC4	0.00181323662737987	0.109289617486339	119.353386653275	8.76392380452724e-28	1.68074530723223e-23
TSHR	0.000906618313689937	0.1183970856102	133.603443918171	6.67144754350423e-31	1.27945020989324e-26
TNFRSF17	0	0.296903460837887	382.073680739432	4.40039389570668e-85	8.43907541318627e-81
UBTF	0	0.162112932604736	192.368954664852	9.66620097511021e-44	1.85378402300664e-39
ZNF331	0	0.0801457194899818	90.0061487775805	2.37421005152881e-21	4.55326003682195e-17
GAREM2	0	0.0546448087431694	59.918742117791	9.88555887170373e-15	1.89585248041534e-10
ZKSCAN4	0	0.110200364298725	126.509578085074	2.37850986762151e-29	4.56150622412453e-25
POLA1	0	0.058287795992714	64.1683786751084	1.14227452372695e-15	2.19065408160354e-11
NPY4R	0.00181323662737987	0.063752276867031	64.7711439905855	8.41220802995942e-16	1.61329325598562e-11
ANAPC15	0	0.174863387978142	209.116880247315	2.14061908388868e-47	4.10527927908171e-43
TREH	0	0.244990892531876	305.570022878883	2.01505770190249e-68	3.8644776607086e-64
NEFM	0	0.346994535519126	460.435950015064	3.86385758729826e-102	7.4101060809206e-98
ZNF211	0	0.0883424408014572	99.8478501098372	1.64565900586024e-23	3.15604484143877e-19
NTSR2	0	0.0628415300546448	69.5030239141286	7.62974494778101e-17	1.46323248608544e-12
RP11-474G23.1	0	0.0573770491803279	63.1044660176753	1.96029135219058e-15	3.75944675523109e-11
OR2AT4	0	0.19672131147541	238.377372862225	8.88209818570719e-54	1.70340879005493e-49
RRAS2	0	0.114754098360656	132.141838278508	1.39302108484303e-30	2.67153583651196e-26
SERPIND1	0	0.159380692167577	188.810236404934	5.78142531668859e-43	1.10876174723454e-38
DNAJC9	0	0.0810564663023679	91.0955180434138	1.36901417587232e-21	2.62549538648794e-17
LIPG	0.000906618313689937	0.120218579234973	135.869874538388	2.13044571827045e-31	4.08576879849907e-27
NCR3LG1	0	0.112021857923497	128.759226265191	7.65650097941709e-30	1.46836375783261e-25
GNPDA1	0.000906618313689937	0.0892531876138433	97.9330531560583	4.32769256628363e-23	8.29964880361875e-19
C4orf32	0	0.0728597449908925	81.3282939023744	1.91169921745354e-19	3.6662567592324e-15
FGF18	0	0.111111111111111	127.633860551138	1.34982661394651e-29	2.58869748022662e-25
CRTC1	0	0.075591985428051	84.5747805666215	3.69954185087099e-20	7.09498136160038e-16
FN3K	0.000906618313689937	0.211293260473588	255.090068292833	2.01744925499863e-57	3.86906418123637e-53
NCOA3	0.000906618313689937	0.205828779599271	247.595422973489	8.68298605153217e-56	1.66522306496284e-51
IFT80	0	0.127504553734062	148.057683820901	4.60809811805662e-34	8.83741057080899e-30
TARM1	0	0.0828779599271403	93.2773630892577	4.54561443226851e-22	8.71757935820455e-18
ASL	0.000906618313689937	0.0792349726775956	85.9247698870666	1.86912805193873e-20	3.5846137780081e-16
GUCA1B	0	0.127504553734062	148.057683820901	4.60809811805662e-34	8.83741057080899e-30
GP5	0	0.146630236794171	172.341330326104	2.27937899265057e-39	4.37139303210526e-35
ECHDC2	0	0.0828779599271403	93.2773630892577	4.54561443226851e-22	8.71757935820455e-18
LMNB1	0.000906618313689937	0.10655737704918	118.978632810739	1.05863740360783e-27	2.0302548126391e-23
ARHGEF10L	0.00271985494106981	0.126593806921676	137.853607425928	7.84522259728659e-32	1.50455678970762e-27
C1orf127	0.00181323662737987	0.122040072859745	135.130063134146	3.09233964973062e-31	5.93048898025338e-27
PLAC1	0	0.034608378870674	36.8306813649292	1.28846512335846e-09	2.47101841357685e-05
RPF1	0	0.108378870673953	124.264256770829	7.37393296826173e-29	1.41417286465323e-24
TMEM189	0	0.230418943533698	284.900121845255	6.42402340284648e-64	1.2319992081979e-59
PPP1R15A	0	0.0692167577413479	77.0139615651969	1.69753681126104e-18	3.25553609663642e-14
WFDC13	0	0.191256830601093	230.996102289585	3.61502482846883e-52	6.93289461603752e-48
STK4	0	0.189435336976321	228.545556899213	1.2374756313606e-51	2.37323076582336e-47
LILRB1	0	0.0828779599271403	93.2773630892577	4.54561443226851e-22	8.71757935820455e-18
ADAMTSL3	0.00362647325475975	0.0947176684881603	95.9068383264499	1.20418726253278e-22	2.30939033208537e-18
MFSD2A	0	0.0901639344262295	102.046367158732	5.42372800574511e-24	1.0401625569418e-19
QPCTL	0	0.075591985428051	84.5747805666215	3.69954185087099e-20	7.09498136160038e-16
MTHFD1L	0.00725294650951949	0.17304189435337	182.721272299183	1.23390073700816e-41	2.36637483343425e-37
HAPLN1	0	0.122950819672131	142.348671243786	8.15911456088885e-33	1.56475499048726e-28
GINM1	0.000906618313689937	0.164845173041894	192.807784454191	7.75309959285884e-44	1.48688943991847e-39
TEAD2	0	0.0719489981785064	80.2481794814122	3.30216578881196e-19	6.33289354978358e-15
HAVCR1	0	0.0956284153005464	108.667142153936	1.91960691060315e-25	3.68142213315472e-21
BSDC1	0	0.0901639344262295	102.046367158732	5.42372800574511e-24	1.0401625569418e-19
FAM19A2	0.0163191296464189	0.0865209471766849	54.2462070964762	1.76878232645958e-13	3.39217074568418e-09
ZNF768	0.000906618313689937	0.270491803278689	339.314340649052	8.99902472012631e-76	1.72583296082582e-71
ZNF91	0.000906618313689937	0.0719489981785064	77.2717430294431	1.48982323128329e-18	2.85718299295509e-14
ZNF430	0	0.0573770491803279	63.1044660176753	1.96029135219058e-15	3.75944675523109e-11
MMP2	0.00271985494106981	0.306010928961749	386.128195211281	5.7648035111465e-86	1.10557401736768e-81
USP43	0.00362647325475975	0.254098360655738	305.860902014897	1.74148046012392e-68	3.33981122642565e-64
TFPI2	0	0.109289617486339	125.386377334497	4.18901417741995e-29	8.03369138945598e-25
TMEM198	0	0.0482695810564663	52.5203503198579	4.258130438957e-13	8.16624255583173e-09
NCOR1	0.00362647325475975	0.240437158469945	286.348229762307	3.10642676366237e-64	5.95750524735169e-60
OR8A1	0	0.246812386156648	308.177859768971	5.44715072766855e-69	1.04465456655227e-64
RASGEF1B	0.0099728014505893	0.0865209471766849	68.6759820210962	1.1604568032108e-16	2.22552405719767e-12
PSMD14	0	0.0446265938069217	48.3145964197624	3.63039809481072e-12	6.962377466228e-08
TMEM45A	0	0.0719489981785064	80.2481794814122	3.30216578881196e-19	6.33289354978358e-15
LARS	0	0.092896174863388	105.352014377528	1.02256423556152e-24	1.96107369095988e-20
ZPR1	0	0.255009107468124	319.980329627209	1.46280310659478e-71	2.80536379782747e-67
NKX2-2	0	0.166666666666667	198.323672587943	4.84899325511854e-45	9.29939926466634e-41
TEAD4	0.00181323662737987	0.13752276867031	154.583013741236	1.72710537594732e-35	3.31224268999177e-31
RPL7A	0	0.0983606557377049	111.991789767092	3.58792930267723e-26	6.88093081667439e-22
PEG3	0	0.0892531876138433	100.946584812457	9.44977196481201e-24	1.81227726741165e-19
CEP170	0.000906618313689937	0.533697632058288	795.952938813236	4.09230364483752e-175	7.8482199300694e-171
CNST	0	0.537340619307832	807.01126087805	1.61322540568144e-177	3.09384368301587e-173
HSD17B12	0.000906618313689937	0.0974499089253188	107.853706795792	2.8936786217746e-25	5.54949686083933e-21
MPV17	0	0.0528233151183971	57.7999282715382	2.90180302459607e-14	5.56507784057034e-10
CD14	0	0.0901639344262295	102.046367158732	5.42372800574511e-24	1.0401625569418e-19
RBM28	0	0.111111111111111	127.633860551138	1.34982661394651e-29	2.58869748022662e-25
CREB3L2	0	0.112932604735883	129.885676763625	4.34071682148543e-30	8.32462672024476e-26
CA13	0.00181323662737987	0.397085610200364	536.865279260603	9.06542222465558e-119	1.73856667424445e-114
KRTDAP	0	0.0883424408014572	99.8478501098372	1.64565900586024e-23	3.15604484143877e-19
AC090154.1	0.00181323662737987	0.372495446265938	495.421299189745	9.42350055563022e-110	1.80723893655876e-105
FCN1	0	0.102914389799636	117.554132216331	2.17093427110123e-27	4.16341774511794e-23
ACSL1	0.000906618313689937	0.108378870673953	121.216597686841	3.42608019461775e-28	6.57053659723792e-24
ZNF770	0	0.104735883424408	119.786545952838	7.04474435619752e-28	1.35104107263156e-23
PLEKHB1	0	0.193989071038251	234.681167175435	5.68200648896253e-53	1.08969520445323e-48
PRAMEF20	0	0.120218579234973	138.93651861976	4.5475623956484e-32	8.7213151623745e-28
TRAPPC11	0	0.107468123861566	123.143214869447	1.29738122602225e-28	2.48811771526547e-24
PRSS35	0.00181323662737987	0.157559198542805	180.248420961515	4.27740276203184e-41	8.20320301702466e-37
ANK1	0	0.325136612021858	425.666632833272	1.42579152007554e-94	2.73438297720087e-90
PAGE5	0	0.0491803278688525	53.5742739679222	2.48998750100034e-13	4.77529802941845e-09
OSM	0	0.183970856102004	221.22334797327	4.89264258550011e-50	9.38310995047211e-46
ECE2	0	0.128415300546448	149.202814380329	2.58945599571306e-34	4.96605870857851e-30
CLCC1	0.00271985494106981	0.110200364298725	117.550514406778	2.1748977590695e-27	4.17101892234349e-23
CCL3	0	0.171220400728597	204.307980749416	2.39763345597014e-46	4.59818144185953e-42
SRBD1	0.00181323662737987	0.0655737704918033	66.9013427158789	2.85440418603895e-16	5.4741763479855e-12
USP17L29	0	0.102914389799636	117.554132216331	2.17093427110123e-27	4.16341774511794e-23
TRAM2	0	0.122950819672131	142.348671243786	8.15911456088885e-33	1.56475499048726e-28
GMFB	0	0.100182149362477	114.213529880073	1.17005360366453e-26	2.24392880110784e-22
ZNF93	0	0.0573770491803279	63.1044660176753	1.96029135219058e-15	3.75944675523109e-11
PTRH2	0	0.243169398907104	302.96758012127	7.43440186647511e-68	1.4257695899526e-63
WFS1	0	0.111111111111111	127.633860551138	1.34982661394651e-29	2.58869748022662e-25
CUL4B	0	0.0236794171220401	24.4410222987486	7.66197177009473e-07	0.0146941294606877
KIRREL3	0.0208522212148685	0.264116575591985	264.94635154084	1.43340151825961e-59	2.74897743171828e-55
SHKBP1	0	0.0810564663023679	91.0955180434138	1.36901417587232e-21	2.62549538648794e-17
OTUD6B	0.00181323662737987	0.418032786885246	573.18433518184	1.13930906523327e-126	2.18496692530437e-122
PADI1	0.000906618313689937	0.127504553734062	144.979918525834	2.16945808512983e-33	4.16058671566199e-29
FZD7	0	0.0473588342440801	51.4674212860382	7.2795130984703e-13	1.39606502202463e-08
GGT7	0.00271985494106981	0.159380692167577	179.576762149203	5.99557580553674e-41	1.14983152798584e-36
CWF19L1	0	0.087431693989071	98.7501616272355	2.86453575608321e-23	5.49360667301638e-19
SLC39A9	0	0.114754098360656	132.141838278508	1.39302108484303e-30	2.67153583651196e-26
SSTR5	0	0.287795992714026	368.317314247727	4.35080057578132e-82	8.34396534423342e-78
NEIL3	0	0.10200364298725	116.439530497623	3.8081508916268e-27	7.30327177996188e-23
MRPL40	0	0.159380692167577	188.810236404934	5.78142531668859e-43	1.10876174723454e-38
PDZD4	0	0.0446265938069217	48.3145964197624	3.63039809481072e-12	6.962377466228e-08
FNDC5	0	0.092896174863388	105.352014377528	1.02256423556152e-24	1.96107369095988e-20
CCDC141	0.000906618313689937	0.040983606557377	41.2536481252563	1.33702076987686e-10	2.56413843246984e-06
TMEM147	0	0.0892531876138433	100.946584812457	9.44977196481201e-24	1.81227726741165e-19
RGS4	0	0.540072859744991	812.641909644109	9.62740194068653e-179	1.84634314418486e-174
SGMS1	0	0.0646630236794171	71.643940829531	2.57752362223913e-17	4.9431748027302e-13
ITIH4	0	0.115664845173042	133.271552386961	7.88536310772085e-31	1.5122549367987e-26
LRIF1	0	0.102914389799636	117.554132216331	2.17093427110123e-27	4.16341774511794e-23
CNOT10	0	0.0819672131147541	92.1859223559541	7.89040688660219e-22	1.51322223271257e-17
AGBL2	0	0.0910746812386157	103.147198577794	3.11149283476603e-24	5.96722095851429e-20
SCAMP4	0	0.104735883424408	119.786545952838	7.04474435619752e-28	1.35104107263156e-23
SNRPD2	0	0.0765027322404372	85.6589949531454	2.13800743610054e-20	4.10027066095362e-16
STK16	0	0.0491803278688525	53.5742739679222	2.48998750100034e-13	4.77529802941845e-09
RHBDD3	0	0.189435336976321	228.545556899213	1.2374756313606e-51	2.37323076582336e-47
CGB2	0	0.0701275045537341	78.0910145866485	9.84005435570406e-19	1.88712562433692e-14
MTHFR	0	0.123861566484517	143.488260376533	4.59701946479677e-33	8.81616392958725e-29
POLN	0	0.108378870673953	124.264256770829	7.37393296826173e-29	1.41417286465323e-24
PHF20	0.000906618313689937	0.166666666666667	195.1907681178	2.34086569310966e-44	4.48931222624571e-40
EIF3M	0	0.120218579234973	138.93651861976	4.5475623956484e-32	8.7213151623745e-28
DDB1	0	0.120218579234973	138.93651861976	4.5475623956484e-32	8.7213151623745e-28
HMGCLL1	0.00362647325475975	0.122040072859745	129.280094585449	5.88927268241244e-30	1.12944471503306e-25
NUP93	0	0.312386156648452	405.799356204511	3.00960915742687e-90	5.77182844211325e-86
TP53I3	0	0.0555555555555556	60.9796487259987	5.766787445985e-15	1.105954496391e-10
RP11-212D19.4	0	0.261384335154827	329.23677161381	1.40935400241846e-73	2.70285910583812e-69
ST6GALNAC2	0	0.206739526411658	252.026262312447	9.39081339105463e-57	1.80097019213646e-52
TNPO1	0.000906618313689937	0.127504553734062	144.979918525834	2.16945808512983e-33	4.16058671566199e-29
UGT1A1	0	0.0573770491803279	63.1044660176753	1.96029135219058e-15	3.75944675523109e-11
SGSM3	0	0.185792349726776	223.65919444739	1.43962429492378e-50	2.76091147280482e-46
OR1D2	0	0.224954462659381	277.23618836748	3.00530858933816e-62	5.76358081263272e-58
MUC21	0	0.12568306010929	145.770755533448	1.456993559777e-33	2.79422224894033e-29
FRMPD4	0.00543970988213962	0.0628415300546448	53.3537271490051	2.7858217227587e-13	5.34264889990663e-09
SORBS2	0.00181323662737987	0.122950819672131	136.265334240781	1.74572301322856e-31	3.34794759476973e-27
NELL2	0.00453309156844968	0.0737704918032787	68.421976097124	1.31998309915187e-16	2.53146358755346e-12
MYO7B	0	0.0446265938069217	48.3145964197624	3.63039809481072e-12	6.962377466228e-08
SPIN4	0	0.034608378870674	36.8306813649292	1.28846512335846e-09	2.47101841357685e-05
ENDOU	0	0.0619307832422587	68.4340803164589	1.31190567308795e-16	2.51597269984807e-12
EHD3	0	0.0555555555555556	60.9796487259987	5.766787445985e-15	1.105954496391e-10
ACAP1	0	0.247723132969035	309.483806253591	2.8292695272888e-69	5.42597309943446e-65
ADAMTS15	0.000906618313689937	0.239526411657559	294.552905059929	5.06460580411198e-66	9.71290101112596e-62
GGCT	0.000906618313689937	0.136612021857924	156.468076034472	6.68934479264995e-36	1.28288254433441e-31
SEMA4D	0.00181323662737987	0.0992714025500911	107.109634812441	4.21211275859378e-25	8.07798984843115e-21
MMP9	0	0.19672131147541	238.377372862225	8.88209818570719e-54	1.70340879005493e-49
SCGB1D2	0	0.112932604735883	129.885676763625	4.34071682148543e-30	8.32462672024476e-26
ANKLE1	0	0.0683060109289618	75.9379264815224	2.92723428044392e-18	5.61384990303535e-14
APTX	0.00362647325475975	0.127504553734062	136.080283257008	1.91623847233873e-31	3.67496214225122e-27
BSND	0	0.0883424408014572	99.8478501098372	1.64565900586024e-23	3.15604484143877e-19
DEFB104B	0	0.341530054644809	451.657932555487	3.14271530801702e-100	6.02709941771504e-96
CCL2	0	0.163023679417122	193.557541531234	5.31904204258399e-44	1.02008588292676e-39
EEF1E1	0	0.148451730418944	174.680172552384	7.03151855047945e-40	1.34850462761095e-35
OR10J5	0.000906618313689937	0.530054644808743	788.519272994851	1.69122075704858e-173	3.24342316786777e-169
RTN1	0	0.111111111111111	127.633860551138	1.34982661394651e-29	2.58869748022662e-25
CCDC25	0	0.344262295081967	456.039718359889	3.49723622812877e-101	6.70699963830535e-97
CYP3A5	0.000906618313689937	0.109289617486339	122.337210717186	1.94756876838523e-28	3.73504738400919e-24
TEF	0	0.185792349726776	223.65919444739	1.43962429492378e-50	2.76091147280482e-46
FOXB1	0	0.0846994535519126	95.4633593484203	1.50654005036232e-22	2.88924250858486e-18
TMPRSS11B	0.000906618313689937	0.0765027322404372	82.6719826523899	9.68645445720435e-20	1.85766823580265e-15
SYTL4	0	0.0191256830601093	19.323057540412	1.10365524407882e-05	0.211659002709436
PTX4	0	0.288706739526412	369.686379062269	2.19017683729641e-82	4.20032113856706e-78
CHAT	0.000906618313689937	0.0728597449908925	78.349685270707	8.63231069355257e-19	1.65550454480951e-14
MNDA	0	0.520947176684882	773.66289062781	2.87304551359987e-170	5.50992668598183e-166
GNG8	0	0.0774134790528233	86.7442376274021	1.2350313019115e-20	2.36854303080587e-16
GPR31	0	0.170309653916211	203.108741353969	4.37986193634125e-46	8.39969922151525e-42
RELL1	0	0.0828779599271403	93.2773630892577	4.54561443226851e-22	8.71757935820455e-18
SULT1A4	0	0.264116575591985	333.224578670884	1.90756787381081e-74	3.65833366839437e-70
PLXNA1	0	0.0865209471766849	97.6535179466407	4.98385400169837e-23	9.55803520445713e-19
LNP1	0	0.0701275045537341	78.0910145866485	9.84005435570406e-19	1.88712562433692e-14
DNTT	0	0.0810564663023679	91.0955180434138	1.36901417587232e-21	2.62549538648794e-17
PLIN4	0	0.0737704918032787	82.4094313553584	1.10624684270184e-19	2.12156019493359e-15
MRPS36	0.000906618313689937	0.127504553734062	144.979918525834	2.16945808512983e-33	4.16058671566199e-29
TIMP3	0.000906618313689937	0.183970856102004	218.06763539461	2.38720579757407e-49	4.57818327858755e-45
AL928654.7	0	0.10655737704918	122.023250109717	2.28148539532661e-28	4.37543269115737e-24
MAPKBP1	0	0.0956284153005464	108.667142153936	1.91960691060315e-25	3.68142213315472e-21
MARCH7	0	0.0446265938069217	48.3145964197624	3.63039809481072e-12	6.962377466228e-08
DNAJA3	0	0.284153005464481	362.855550862918	6.72670990102971e-81	1.29004842481948e-76
SEMA3C	0.000906618313689937	0.108378870673953	121.216597686841	3.42608019461775e-28	6.57053659723792e-24
CNTNAP3	0	0.0655737704918033	72.7159164761831	1.49721726795334e-17	2.87136327648092e-13
C6orf25	0	0.110200364298725	126.509578085074	2.37850986762151e-29	4.56150622412453e-25
PARK2	0.0108794197642792	0.195810564663024	201.449672021948	1.0080604687398e-45	1.93325836694919e-41
IL10RA	0	0.254098360655738	318.663485234103	2.83155477801808e-71	5.43035575328307e-67
BBC3	0	0.0701275045537341	78.0910145866485	9.84005435570406e-19	1.88712562433692e-14
EXOC3L2	0.000906618313689937	0.0801457194899818	87.011142181804	1.07911517927719e-20	2.06952709081779e-16
SERPINC1	0	0.515482695810565	762.709940679739	6.91565847524285e-168	1.32628498238207e-163
SLC1A5	0.00181323662737987	0.0774134790528233	80.8568313903875	2.42677461745467e-19	4.65406836135457e-15
CDH19	0	0.14207650273224	166.51424850419	4.27104957057765e-38	8.19101886645382e-34
MAT2B	0	0.109289617486339	125.386377334497	4.18901417741995e-29	8.03369138945598e-25
UBE4B	0.000906618313689937	0.116575591985428	131.341422675893	2.08480641669571e-30	3.99824174593903e-26
POLR2L	0	0.123861566484517	143.488260376533	4.59701946479677e-33	8.81616392958725e-29
KANSL2	0	0.0564663023679417	62.041556368439	3.36285214548535e-15	6.44927784461180e-11
KCNQ3	0.00634632819582956	0.451730418943534	616.577537653418	4.15081662967253e-136	7.96043613238598e-132
PLXNA4	0.000906618313689937	0.11384335154827	127.956634045054	1.14722453855395e-29	2.20014722003877e-25
COX7A2	0	0.147540983606557	173.510177658552	1.26634872107005e-39	2.42860357726814e-35
PRKRIP1	0.000906618313689937	0.101092896174863	112.290736605664	3.08574060096966e-26	5.91783332453961e-22
NCOR2	0.00362647325475975	0.0856102003642987	85.0172276164446	2.95776748807733e-20	5.6724064886347e-16
SPATA8	0	0.1183970856102	136.667246747984	1.42583956641807e-31	2.73447512047657e-27
MAPK7	0	0.217668488160291	267.090534248766	4.88682900427375e-60	9.3719606643962e-56
SLC22A8	0	0.107468123861566	123.143214869447	1.29738122602225e-28	2.48811771526547e-24
UBE2W	0.00181323662737987	0.377049180327869	503.001473524211	2.11307108015144e-111	4.05244771751443e-107
USF1	0	0.546448087431694	825.862152895553	1.28609806939325e-181	2.46647887748238e-177
FAM131A	0	0.126593806921676	146.913664738406	8.19604965506095e-34	1.57183840284759e-29
SCNM1	0	0.514571948998178	760.892259856589	1.7181247037938e-167	3.29501955693575e-163
PLEKHA7	0.000906618313689937	0.1183970856102	133.603443918171	6.67144754350423e-31	1.27945020989324e-26
OR2C1	0	0.277777777777778	353.352920942225	7.8886622694592e-79	1.51288765003689e-74
EPHB4	0	0.111111111111111	127.633860551138	1.34982661394651e-29	2.58869748022662e-25
NKG7	0	0.0810564663023679	91.0955180434138	1.36901417587232e-21	2.62549538648794e-17
ZNF233	0	0.0819672131147541	92.1859223559541	7.89040688660219e-22	1.51322223271257e-17
RGPD3	0	0.0355191256830601	37.8697046244922	7.56306185997004e-10	1.45044400350505e-05
STAG1	0.00362647325475975	0.107468123861566	111.350601285809	4.95794385733229e-26	9.50834472959187e-22
LIN9	0	0.541894353369763	816.407362247147	1.46167245163134e-179	2.80319542773858e-175
ZGLP1	0	0.0728597449908925	81.3282939023744	1.91169921745354e-19	3.6662567592324e-15
GATM	0	0.0883424408014572	99.8478501098372	1.64565900586024e-23	3.15604484143877e-19
RAB39A	0	0.251366120218579	314.721161591257	2.04538958150731e-70	3.92264813941472e-66
FANCL	0	0.063752276867031	70.5729770331577	4.43551329395536e-17	8.50642739514759e-13
UTF1	0	0.112932604735883	129.885676763625	4.34071682148543e-30	8.32462672024476e-26
PGD	0	0.120218579234973	138.93651861976	4.5475623956484e-32	8.7213151623745e-28
NEDD4	0.00181323662737987	0.0883424408014572	93.9043535699968	3.31144963869286e-22	6.35069811708517e-18
OR52K1	0	0.119307832422587	137.801334077567	8.05447961614703e-32	1.54468810078468e-27
C2CD2	0	0.11384335154827	131.013213586699	2.45963552571946e-30	4.71708901122478e-26
AC091180.1	0.000906618313689937	0.22040072859745	267.683341889724	3.62929867541105e-60	6.96026899970331e-56
AREG	0	0.0910746812386157	103.147198577794	3.11149283476603e-24	5.96722095851429e-20
USP25	0.00362647325475975	0.115664845173042	121.399376070104	3.12453723757587e-28	5.992237514223e-24
ZNF574	0	0.0792349726775956	88.9178131914755	4.11560709029152e-21	7.89291127776108e-17
PHLDB3	0	0.0765027322404372	85.6589949531454	2.13800743610054e-20	4.10027066095362e-16
TMEM74B	0	0.162112932604736	192.368954664852	9.66620097511021e-44	1.85378402300664e-39
C1QL4	0	0.0573770491803279	63.1044660176753	1.96029135219058e-15	3.75944675523109e-11
ZMAT3	0	0.15391621129326	181.72433507503	2.03674991626507e-41	3.90607898941315e-37
IMP3	0	0.0801457194899818	90.0061487775805	2.37421005152881e-21	4.55326003682195e-17
BCL2L2	0	0.0974499089253188	110.882513695638	6.27833544390129e-26	1.20405917143139e-21
APPL2	0.00181323662737987	0.0746812386156648	77.6196795603587	1.24919265463069e-18	2.39570167305074e-14
ZNF273	0	0.0883424408014572	99.8478501098372	1.64565900586024e-23	3.15604484143877e-19
PAQR6	0	0.513661202185792	759.07679979462	4.26377416491213e-167	8.17706609346848e-163
STIM2	0	0.100182149362477	114.213529880073	1.17005360366453e-26	2.24392880110784e-22
XPO1	0	0.0655737704918033	72.7159164761831	1.49721726795334e-17	2.87136327648092e-13
ZIM2	0	0.0892531876138433	100.946584812457	9.44977196481201e-24	1.81227726741165e-19
VTI1A	0.00634632819582956	0.100182149362477	94.4059676369456	2.57016227998095e-22	4.92905722054747e-18
TAX1BP3	0.000906618313689937	0.226775956284153	276.575530635814	4.18661941003754e-62	8.02909870456999e-58
CCDC168	0	0.200364298724954	243.323064581465	7.41565332462448e-55	1.42217399459648e-50
C17orf80	0	0.234972677595628	291.322893772541	2.56042441614119e-65	4.91038194527557e-61
GNRHR	0.000906618313689937	0.0719489981785064	77.2717430294431	1.48982323128329e-18	2.85718299295509e-14
EZR	0	0.165755919854281	197.130368795606	8.832258765274e-45	1.69385058600425e-40
CYP2C8	0.00181323662737987	0.0810564663023679	85.1884509743094	2.71241521090455e-20	5.20186989147275e-16
FOXP3	0.000906618313689937	0.0418943533697632	42.2950195365079	7.84921942134701e-11	1.50532330062593e-06
FATE1	0	0.040983606557377	44.1247278223639	3.08104059265001e-11	5.90881964858419e-07
RCBTB2	0	0.212204007285974	259.535431266358	2.16661313812195e-58	4.15513067629028e-54
BTN3A3	0	0.115664845173042	133.271552386961	7.88536310772085e-31	1.5122549367987e-26
HIVEP2	0.000906618313689937	0.167577413479053	196.384037761036	1.28514170283418e-44	2.46464475769539e-40
ALKBH4	0	0.0956284153005464	108.667142153936	1.91960691060315e-25	3.68142213315472e-21
DPM3	0	0.522768670309654	777.331826037277	4.5773971572953e-171	8.77853226826093e-167
CFAP206	0	0.172131147540984	205.508412561015	1.3117537724257e-46	2.51568138475801e-42
NBEA	0.00271985494106981	0.203096539162113	237.612251527134	1.30422316431744e-53	2.50123918452799e-49
ZNF275	0	0.0373406193078324	39.9507379401292	2.6044915643605e-10	4.99489392213057e-06
NLRP8	0.000906618313689937	0.0892531876138433	97.9330531560583	4.32769256628363e-23	8.29964880361875e-19
SMIM22	0	0.288706739526412	369.686379062269	2.19017683729641e-82	4.20032113856706e-78
CTR9	0	0.120218579234973	138.93651861976	4.5475623956484e-32	8.7213151623745e-28
CFAP43	0	0.092896174863388	105.352014377528	1.02256423556152e-24	1.96107369095988e-20
PPP4R2	0	0.111111111111111	127.633860551138	1.34982661394651e-29	2.58869748022662e-25
C2orf68	0	0.0473588342440801	51.4674212860382	7.2795130984703e-13	1.39606502202463e-08
RASAL3	0	0.0774134790528233	86.7442376274021	1.2350313019115e-20	2.36854303080587e-16
BATF3	0	0.541894353369763	816.407362247147	1.46167245163134e-179	2.80319542773858e-175
POTEF	0	0.0437158469945355	47.2656407481687	6.19893609935481e-12	1.18883196513427e-07
KCNK15	0	0.187613843351548	226.099925863946	4.22585656695139e-51	8.10434772409938e-47
PYCR1	0	0.199453551912568	242.084769853836	1.38083141836861e-54	2.64815849414732e-50
HSP90AA1	0.000906618313689937	0.104735883424408	116.745007665415	3.26453292695244e-27	6.26072124730939e-23
TANK	0	0.0437158469945355	47.2656407481687	6.19893609935481e-12	1.18883196513427e-07
HCFC1	0	0.046448087431694	50.4154862878962	1.2440860764818e-12	2.3859082774768e-08
HTR5A	0.000906618313689937	0.127504553734062	144.979918525834	2.16945808512983e-33	4.16058671566199e-29
ZNF347	0	0.0810564663023679	91.0955180434138	1.36901417587232e-21	2.62549538648794e-17
PLK2	0.000906618313689937	0.135701275045537	155.314191943465	1.19545611980034e-35	2.29264574655309e-31
ZNF648	0	0.519125683060109	770.00295327826	1.79520826904265e-169	3.44285041836999e-165
PRICKLE3	0.000906618313689937	0.040983606557377	41.2536481252563	1.33702076987686e-10	2.56413843246984e-06
MTMR9	0	0.345173041894353	457.503520293748	1.67946727498716e-101	3.22088233997038e-97
CEP250	0	0.163023679417122	193.557541531234	5.31904204258399e-44	1.02008588292676e-39
WDR3	0	0.10655737704918	122.023250109717	2.28148539532661e-28	4.37543269115737e-24
TMEM254	0.000906618313689937	0.0947176684881603	104.537204446955	1.54269335559956e-24	2.95857731736884e-20
CXorf58	0.000906618313689937	0.0546448087431694	56.991149515722	4.37777638262746e-14	8.39569954660294e-10
TMEM11	0.00181323662737987	0.207650273224044	246.93777946011	1.20794604158939e-55	2.31659891856013e-51
MAPRE2	0.000906618313689937	0.115664845173042	130.212062081493	3.68256890395114e-30	7.0624306439975e-26
NAPRT	0.00181323662737987	0.425318761384335	586.043238661839	1.81787890760435e-129	3.48632816900362e-125
AKAP1	0	0.239526411657559	297.778810245667	1.00392138924255e-66	1.92532044028936e-62
CD72	0	0.112021857923497	128.759226265191	7.65650097941709e-30	1.46836375783261e-25
FPGT-TNNI3K	0.000906618313689937	0.100182149362477	111.179865740103	5.40385679020553e-26	1.03635165522562e-21
GGA1	0	0.189435336976321	228.545556899213	1.2374756313606e-51	2.37323076582336e-47
OR10G9	0	0.248633879781421	310.791107567942	1.46854727229749e-69	2.81637995881213e-65
AURKC	0	0.0883424408014572	99.8478501098372	1.64565900586024e-23	3.15604484143877e-19
BLOC1S5-TXNDC5	0.00181323662737987	0.154826958105647	176.715483888412	2.52696509121805e-40	4.84621365193798e-36
TMEM257	0	0.034608378870674	36.8306813649292	1.28846512335846e-09	2.47101841357685e-05
ARHGAP22	0.00362647325475975	0.075591985428051	73.1788048382313	1.18420639936875e-17	2.27107103270939e-13
SDC4	0	0.192167577413479	232.223222489557	1.95211207539101e-52	3.74376053818488e-48
SLC25A39	0	0.163934426229508	194.747305013788	2.92524505146981e-44	5.6100349597088e-40
CCDC57	0	0.206739526411658	252.026262312447	9.39081339105463e-57	1.80097019213646e-52
C12orf54	0	0.0573770491803279	63.1044660176753	1.96029135219058e-15	3.75944675523109e-11
QDPR	0	0.10200364298725	116.439530497623	3.8081508916268e-27	7.30327177996188e-23
OR51H1	0	0.119307832422587	137.801334077567	8.05447961614703e-32	1.54468810078468e-27
GLYR1	0.00181323662737987	0.295081967213115	372.747785577483	4.71978171208213e-83	9.05159736743111e-79
ADH1C	0	0.0765027322404372	85.6589949531454	2.13800743610054e-20	4.10027066095362e-16
SAMD3	0.00271985494106981	0.163934426229508	185.491748823164	3.06510756630474e-42	5.87826329065923e-38
PFDN2	0	0.544626593806922	822.073158775531	8.57116477147107e-181	1.64377797987272e-176
SLC16A10	0.000906618313689937	0.191256830601093	227.830963761055	1.77166974154497e-51	3.39770823033494e-47
SLC6A16	0	0.0728597449908925	81.3282939023744	1.91169921745354e-19	3.6662567592324e-15
FOXI2	0	0.105646630236794	120.904360975029	4.0100522805236e-28	7.69047826358816e-24
PRDM5	0.00453309156844968	0.0746812386156648	69.4833997805026	7.70603570789111e-17	1.47786352805936e-12
RPL19	0.000906618313689937	0.217668488160291	263.891858287001	2.43336752225273e-59	4.66671223417629e-55
DGCR6L	0	0.159380692167577	188.810236404934	5.78142531668859e-43	1.10876174723454e-38
C1orf131	0	0.549180327868853	831.563427309939	7.4091391770832e-183	1.42092471138102e-178
FAM200B	0	0.0938069216757741	106.456001642844	5.85787389460085e-25	1.12342305550655e-20
GRM2	0	0.112021857923497	128.759226265191	7.65650097941709e-30	1.46836375783261e-25
RDH8	0	0.0701275045537341	78.0910145866485	9.84005435570406e-19	1.88712562433692e-14
TBX1	0	0.159380692167577	188.810236404934	5.78142531668859e-43	1.10876174723454e-38
HIPK1	0	0.10200364298725	116.439530497623	3.8081508916268e-27	7.30327177996188e-23
RNF152	0.000906618313689937	0.135701275045537	155.314191943465	1.19545611980034e-35	2.29264574655309e-31
OR10K1	0	0.518214936247723	768.176348538299	4.47993194646629e-169	8.59161348693305e-165
IFNA1	0.000906618313689937	0.157559198542805	183.323008809926	9.11818636133543e-42	1.74868578037691e-37
FGD3	0	0.0965391621129326	109.774298314311	1.09807945314936e-25	2.10589677524984e-21
RPP25L	0	0.1183970856102	136.667246747984	1.42583956641807e-31	2.73447512047657e-27
RALGPS2	0	0.516393442622951	764.529846341275	2.78054464395939e-168	5.33252851818532e-164
DUOXA1	0	0.087431693989071	98.7501616272355	2.86453575608321e-23	5.49360667301638e-19
FAM133A	0	0.0227686703096539	23.4152513338367	1.30539481202613e-06	0.0250348617050371
CRTAM	0.000906618313689937	0.249544626593807	308.861488150224	3.86583472936396e-69	7.4138978439742e-65
BORCS5	0.00362647325475975	0.129326047358834	138.356315498399	6.0906581772995e-32	1.1680664252425e-27
ORC5	0.000906618313689937	0.107468123861566	120.09707214682	6.02396096030487e-28	1.15527523296727e-23
CXXC4	0	0.0765027322404372	85.6589949531454	2.13800743610054e-20	4.10027066095362e-16
DHX38	0.000906618313689937	0.323315118397086	419.481669857019	3.16422323190427e-93	6.06834731414601e-89
NUP107	0.00181323662737987	0.104735883424408	113.771521911425	1.46222565328212e-26	2.80425635786445e-22
FRK	0	0.182149362477231	218.79237182518	1.6588278345047e-49	3.18130002101311e-45
CCAR1	0	0.0774134790528233	86.7442376274021	1.2350313019115e-20	2.36854303080587e-16
KRT71	0	0.0601092896174863	66.2992171524673	3.87412500579613e-16	7.42979693611582e-12
TIAF1	0	0.179417122040073	215.15500763766	1.03098527212307e-48	1.97722355487762e-44
ATRN	0.00181323662737987	0.162112932604736	186.160158604316	2.19043059566397e-42	4.20080779636436e-38
HOXD1	0	0.040983606557377	44.1247278223639	3.08104059265001e-11	5.90881964858419e-07
TTLL12	0	0.19672131147541	238.377372862225	8.88209818570719e-54	1.70340879005493e-49
GNPAT	0	0.549180327868853	831.563427309939	7.4091391770832e-183	1.42092471138102e-178
CTF1	0	0.268670309653916	339.898822163968	6.71282527497972e-76	1.28738563123561e-71
BHMT	0	0.131147540983607	152.644890967893	4.58017460300657e-35	8.783858853646e-31
DARS	0.000906618313689937	0.046448087431694	47.5188738661877	5.44769100927837e-12	1.04475818175941e-07
ZGRF1	0	0.0746812386156648	83.4915931402682	6.39875086724428e-20	1.22715244132011e-15
FXYD6-FXYD2	0.000906618313689937	0.255009107468124	316.73532537295	7.44782206125779e-71	1.42834331490802e-66
KRTAP5-3	0	0.122950819672131	142.348671243786	8.15911456088885e-33	1.56475499048726e-28
REEP3	0	0.0956284153005464	108.667142153936	1.91960691060315e-25	3.68142213315472e-21
SYNE1	0.00453309156844968	0.172131147540984	190.223698261537	2.84120579890399e-43	5.44886448113807e-39
DDHD1	0	0.102914389799636	117.554132216331	2.17093427110123e-27	4.16341774511794e-23
PLA2G10	0	0.277777777777778	353.352920942225	7.8886622694592e-79	1.51288765003689e-74
TMEM176A	0	0.1183970856102	136.667246747984	1.42583956641807e-31	2.73447512047657e-27
EOGT	0.000906618313689937	0.11384335154827	127.956634045054	1.14722453855395e-29	2.20014722003877e-25
SCNN1A	0	0.129326047358834	150.349058019671	1.45433524206431e-34	2.78912412723093e-30
AL445183.1	0	0.0828779599271403	93.2773630892577	4.54561443226851e-22	8.71757935820455e-18
NRROS	0	0.135701275045537	158.404065132319	2.52552396420826e-36	4.8434498585586e-32
CCDC187	0.00181323662737987	0.107468123861566	117.117329375355	2.70577917611556e-27	5.18914330395442e-23
ZCCHC9	0	0.122040072859745	141.21018562702	1.44737799576088e-32	2.77578152027022e-28
TMC5	0.000906618313689937	0.288706739526412	366.400140682658	1.13764114733767e-81	2.18176819236418e-77
PDS5A	0.000906618313689937	0.0856102003642987	93.5515724516684	3.95753115320078e-22	7.58975324560846e-18
SP7	0	0.0573770491803279	63.1044660176753	1.96029135219058e-15	3.75944675523109e-11
SPP1	0	0.0728597449908925	81.3282939023744	1.91169921745354e-19	3.6662567592324e-15
KCNAB3	0	0.245901639344262	306.873266010478	1.04802977603413e-68	2.00991150447825e-64
KLC1	0	0.112021857923497	128.759226265191	7.65650097941709e-30	1.46836375783261e-25
LANCL2	0	0.121129326047359	140.072801944905	2.56621872284125e-32	4.92149426666495e-28
CLLU1OS	0	0.087431693989071	98.7501616272355	2.86453575608321e-23	5.49360667301638e-19
WDR97	0.00181323662737987	0.418032786885246	573.18433518184	1.13930906523327e-126	2.18496692530437e-122
DCUN1D2	0	0.205828779599271	250.779170602092	1.7562021296358e-56	3.36804444421554e-52
HIST1H4J	0	0.114754098360656	132.141838278508	1.39302108484303e-30	2.67153583651196e-26
PTPRR	0.000906618313689937	0.110200364298725	123.458912535907	1.10654078262404e-28	2.12212391291638e-24
ID3	0	0.112021857923497	128.759226265191	7.65650097941709e-30	1.46836375783261e-25
SZT2	0	0.0965391621129326	109.774298314311	1.09807945314936e-25	2.10589677524984e-21
MRPL32	0	0.1183970856102	136.667246747984	1.42583956641807e-31	2.73447512047657e-27
CTB-50L17.10	0	0.0737704918032787	82.4094313553584	1.10624684270184e-19	2.12156019493359e-15
FOXR1	0.000906618313689937	0.241347905282332	297.142355798147	1.3815467196904e-66	2.64953029902225e-62
TRMT11	0	0.170309653916211	203.108741353969	4.37986193634125e-46	8.39969922151525e-42
FMNL3	0	0.0564663023679417	62.041556368439	3.36285214548535e-15	6.44927784461180e-11
SKOR2	0	0.1183970856102	136.667246747984	1.42583956641807e-31	2.73447512047657e-27
HOOK3	0.000906618313689937	0.301457194899818	385.705273870035	7.12619107731188e-86	1.36666092480687e-81
CHRNE	0	0.222222222222222	273.421846359346	2.03774484228314e-61	3.90798705853061e-57
HAUS6	0.00271985494106981	0.141165755919854	156.21146852638	7.61127103767257e-36	1.45968955960485e-31
DNAJC2	0.000906618313689937	0.10655737704918	118.978632810739	1.05863740360783e-27	2.0302548126391e-23
ECI2	0	0.14936247723133	175.851316688379	3.90214593442377e-40	7.48353547303791e-36
ICE2	0	0.0828779599271403	93.2773630892577	4.54561443226851e-22	8.71757935820455e-18
ZRSR1	0	0.111111111111111	127.633860551138	1.34982661394651e-29	2.58869748022662e-25
PLN	0	0.167577413479053	199.518159982608	2.66060738906744e-45	5.10251285075354e-41
KCNK13	0.00181323662737987	0.112021857923497	122.715768069433	1.60927308721462e-28	3.0862639266602e-24
ANKRD13C	0	0.0992714025500911	113.102128002462	2.04942098346858e-26	3.93037956209604e-22
OR6C68	0	0.0591985428051002	65.2332953689644	6.65358094439778e-16	1.27602375351661e-11
AC016734.1	0	0.0601092896174863	66.2992171524673	3.87412500579613e-16	7.42979693611582e-12
TMEM241	0.00271985494106981	0.115664845173042	124.277359980709	7.32539955659172e-29	1.40486512696316e-24
TMPRSS13	0	0.254098360655738	318.663485234103	2.83155477801808e-71	5.43035575328307e-67
DMRTA2	0	0.087431693989071	98.7501616272355	2.86453575608321e-23	5.49360667301638e-19
SNAP23	0	0.0919854280510018	104.249080504143	1.78415788957303e-24	3.42165800062316e-20
OR5L1	0	0.0655737704918033	72.7159164761831	1.49721726795334e-17	2.87136327648092e-13
GNA12	0.000906618313689937	0.141165755919854	162.254506127671	3.63987739288995e-37	6.98055686408435e-33
LSM4	0	0.0737704918032787	82.4094313553584	1.10624684270184e-19	2.12156019493359e-15
OR1J2	0.000906618313689937	0.0965391621129326	106.747134545475	5.05753517124626e-25	9.69934095141608e-21
IL33	0.000906618313689937	0.165755919854281	193.998684252186	4.26138850534021e-44	8.17249087554145e-40
TMEM123	0	0.236794171220401	293.901268683108	7.02302799519394e-66	1.34687630891829e-61
SEMG2	0	0.189435336976321	228.545556899213	1.2374756313606e-51	2.37323076582336e-47
RXRG	0.00543970988213962	0.529143897996357	768.988693005441	2.98293739852229e-169	5.72067734288605e-165
RP1-321E8.5	0	0.0218579234972678	22.3905523592203	2.22465661848974e-06	0.0426644646293962
NEDD4L	0.00362647325475975	0.134790528233151	145.212378374107	1.92987861398475e-33	3.70112120589995e-29
CARKD	0	0.205828779599271	250.779170602092	1.7562021296358e-56	3.36804444421554e-52
C11orf80	0.000906618313689937	0.150273224043716	173.91304335842	1.03412771753326e-39	1.98325013668529e-35
TACC1	0	0.334244080145719	440.043255528619	1.05933213983862e-97	2.03158717778251e-93
OXA1L	0	0.101092896174863	115.325996882723	6.67677841881049e-27	1.28047256515948e-22
IMPDH2	0	0.111111111111111	127.633860551138	1.34982661394651e-29	2.58869748022662e-25
PYDC2	0.000906618313689937	0.136612021857924	156.468076034472	6.68934479264995e-36	1.28288254433441e-31
ALG13	0	0.017304189435337	17.2838004304061	3.21919634783475e-05	0.617377475587748
KCTD7	0	0.0828779599271403	93.2773630892577	4.54561443226851e-22	8.71757935820455e-18
RASAL2	0	0.52367941712204	779.169678390282	1.82399036603965e-171	3.49804872399084e-167
KIAA1549L	0	0.123861566484517	143.488260376533	4.59701946479677e-33	8.81616392958725e-29
NME6	0	0.10655737704918	122.023250109717	2.28148539532661e-28	4.37543269115737e-24
EPHA3	0.00453309156844968	0.0856102003642987	82.3259413114884	1.153975894223e-19	2.21309496994087e-15
MNS1	0.00181323662737987	0.0828779599271403	87.3608507414719	9.04227023921914e-21	1.73412658647745e-16
GREB1L	0	0.102914389799636	117.554132216331	2.17093427110123e-27	4.16341774511794e-23
FARSB	0	0.0546448087431694	59.918742117791	9.88555887170373e-15	1.89585248041534e-10
TMEM31	0	0.017304189435337	17.2838004304061	3.21919634783475e-05	0.617377475587748
NMNAT1	0	0.117486338797814	135.53425506436	2.52277621816039e-31	4.838180231188e-27
SULT4A1	0.000906618313689937	0.197632058287796	236.438609533799	2.35110139749909e-53	4.50894226012375e-49
HERC4	0	0.0783242258652095	87.8305099254412	7.13104526287773e-21	1.36759186051469e-16
SKIDA1	0	0.105646630236794	120.904360975029	4.0100522805236e-28	7.69047826358816e-24
PROSER2	0.00181323662737987	0.140255009107468	158.049958067711	3.01803920895365e-36	5.78799559493131e-32
HLA-DQA1	0	0.110200364298725	126.509578085074	2.37850986762151e-29	4.56150622412453e-25
RP11-571M6.15	0	0.0683060109289618	75.9379264815224	2.92723428044392e-18	5.61384990303535e-14
COG1	0	0.234972677595628	291.322893772541	2.56042441614119e-65	4.91038194527557e-61
XK	0	0.0373406193078324	39.9507379401292	2.6044915643605e-10	4.99489392213057e-06
ZNF283	0.000906618313689937	0.0810564663023679	88.0985703506254	6.22726199996695e-21	1.19426430635366e-16
DEFB108B	0	0.167577413479053	199.518159982608	2.66060738906744e-45	5.10251285075354e-41
AGPS	0	0.0446265938069217	48.3145964197624	3.63039809481072e-12	6.962377466228e-08
HMGB2	0	0.0974499089253188	110.882513695638	6.27833544390129e-26	1.20405917143139e-21
BCAP31	0	0.0418943533697632	45.1707065722392	1.80586172080178e-11	3.46328160815365e-07
ASGR1	0	0.248633879781421	310.791107567942	1.46854727229749e-69	2.81637995881213e-65
TAF9B	0	0.0200364298724954	20.3444351137764	6.46809211563186e-06	0.124045070593588
HEPACAM2	0.000906618313689937	0.105646630236794	117.86127840425	1.85948785452353e-27	3.56612580740523e-23
TMEM59	0	0.0846994535519126	95.4633593484203	1.50654005036232e-22	2.88924250858486e-18
THAP9	0	0.0701275045537341	78.0910145866485	9.84005435570406e-19	1.88712562433692e-14
LSP1	0	0.121129326047359	140.072801944905	2.56621872284125e-32	4.92149426666495e-28
PFKFB4	0.00181323662737987	0.109289617486339	119.353386653275	8.76392380452724e-28	1.68074530723223e-23
DOK3	0	0.115664845173042	133.271552386961	7.88536310772085e-31	1.5122549367987e-26
TRIM25	0	0.233151183970856	288.749821959665	9.31023812605075e-65	1.78551746781401e-60
TUSC1	0.000906618313689937	0.141165755919854	162.254506127671	3.63987739288995e-37	6.98055686408435e-33
CSF3R	0	0.092896174863388	105.352014377528	1.02256423556152e-24	1.96107369095988e-20
GOLGA8K	0	0.104735883424408	119.786545952838	7.04474435619752e-28	1.35104107263156e-23
CELF6	0	0.0792349726775956	88.9178131914755	4.11560709029152e-21	7.89291127776108e-17
ZDHHC6	0	0.0910746812386157	103.147198577794	3.11149283476603e-24	5.96722095851429e-20
BORCS7-ASMT	0	0.092896174863388	105.352014377528	1.02256423556152e-24	1.96107369095988e-20
ADK	0	0.0974499089253188	110.882513695638	6.27833544390129e-26	1.20405917143139e-21
MRPS23	0	0.234972677595628	291.322893772541	2.56042441614119e-65	4.91038194527557e-61
GOLGA6L10	0	0.0901639344262295	102.046367158732	5.42372800574511e-24	1.0401625569418e-19
FAM181A	0	0.120218579234973	138.93651861976	4.5475623956484e-32	8.7213151623745e-28
MT1E	0	0.313296903460838	407.20851262399	1.48513722074566e-90	2.84819616194603e-86
C14orf169	0	0.112932604735883	129.885676763625	4.34071682148543e-30	8.32462672024476e-26
CDH6	0.000906618313689937	0.152094717668488	176.258567709483	3.17960606160661e-40	6.09784850494916e-36
WFDC1	0	0.336976320582878	444.386865275091	1.20145053056131e-98	2.30414182751048e-94
DNAAF3	0	0.0883424408014572	99.8478501098372	1.64565900586024e-23	3.15604484143877e-19
USP17L21	0	0.102914389799636	117.554132216331	2.17093427110123e-27	4.16341774511794e-23
UBA52	0	0.0719489981785064	80.2481794814122	3.30216578881196e-19	6.33289354978358e-15
LRRK1	0.00362647325475975	0.133879781420765	144.066784447972	3.43549596149053e-33	6.58859415494654e-29
MYH3	0	0.248633879781421	310.791107567942	1.46854727229749e-69	2.81637995881213e-65
EXOSC4	0.00181323662737987	0.418943533697632	574.785225778362	5.10986030239305e-127	9.79969008792939e-123
RUSC1	0	0.522768670309654	777.331826037277	4.5773971572953e-171	8.77853226826093e-167
DHX33	0.000906618313689937	0.233151183970856	285.531821739218	4.67904906797478e-64	8.97348030256203e-60
COBLL1	0.000906618313689937	0.0437158469945355	44.3811871520528	2.70271894002715e-11	5.18327438318407e-07
RAB33A	0	0.0273224043715847	28.5545957331752	9.10933610413961e-08	0.00174698847805189
PCDH15	0.0117860380779692	0.0856102003642987	63.2523863472302	1.81847223266202e-15	3.48746604779922e-11
UNC5D	0.00271985494106981	0.334244080145719	430.085062979434	1.55730650342511e-95	2.98660241226868e-91
ANKRD61	0	0.12568306010929	145.770755533448	1.456993559777e-33	2.79422224894033e-29
HNRNPA1	0	0.0601092896174863	66.2992171524673	3.87412500579613e-16	7.42979693611582e-12
GATC	0.000906618313689937	0.0673952641165756	71.8978178303321	2.26634432232895e-17	4.34639514136246e-13
HTRA2	0	0.0482695810564663	52.5203503198579	4.258130438957e-13	8.16624255583173e-09
NAT9	0	0.221311475409836	272.15299677126	3.85194220243342e-61	7.38725475582681e-57
MFSD6	0.000906618313689937	0.0519125683060109	53.8239797116922	2.19279996594646e-13	4.20535177469212e-09
BCL2L1	0	0.154826958105647	182.902410158011	1.12650667767553e-41	2.16041450644613e-37
ZNF280B	0	0.170309653916211	203.108741353969	4.37986193634125e-46	8.39969922151525e-42
CTNS	0	0.225865209471767	278.510240095938	1.58578268362814e-62	3.04121403066205e-58
IVL	0	0.526411657559198	784.696824091742	1.14627039566454e-172	2.19831736480545e-168
RAB33B	0	0.0701275045537341	78.0910145866485	9.84005435570406e-19	1.88712562433692e-14
COG7	0	0.276867030965392	352.001127609935	1.55370733799676e-78	2.97969993281019e-74
AC026248.1	0.00271985494106981	0.469945355191257	663.997895465523	2.01787424125787e-146	3.86987921988434e-142
CPNE8	0.00181323662737987	0.0719489981785064	74.3924787322253	6.40324990828607e-18	1.2280152674111e-13
ATAD2B	0	0.0564663023679417	62.041556368439	3.36285214548535e-15	6.44927784461180e-11
UBAP1L	0	0.075591985428051	84.5747805666215	3.69954185087099e-20	7.09498136160038e-16
AD000671.6	0	0.0883424408014572	99.8478501098372	1.64565900586024e-23	3.15604484143877e-19
PFDN1	0	0.0901639344262295	102.046367158732	5.42372800574511e-24	1.0401625569418e-19
COL8A2	0	0.092896174863388	105.352014377528	1.02256423556152e-24	1.96107369095988e-20
KRTAP13-2	0	0.0892531876138433	100.946584812457	9.44977196481201e-24	1.81227726741165e-19
TRIP4	0	0.0837887067395264	94.3698416242314	2.61749973278805e-22	5.01984098754092e-18
LY96	0.00181323662737987	0.378870673952641	506.045453110576	4.59851222671353e-112	8.81902674839121e-108
UBA7	0	0.112932604735883	129.885676763625	4.34071682148543e-30	8.32462672024476e-26
SCARB1	0.000906618313689937	0.087431693989071	95.7401890702181	1.30994059830759e-22	2.5122040794343e-18
UBOX5	0	0.156648451730419	185.262045352533	3.44026136370091e-42	6.59773324330561e-38
RP4-576H24.4	0	0.157559198542805	186.443608885751	1.89955610505757e-42	3.64296869827941e-38
CGA	0	0.169398907103825	201.910692604669	7.99623712236527e-46	1.53351835532721e-41
STX16	0	0.256830601092896	322.61813600895	3.89602447387879e-72	7.47179573600474e-68
CIT	0.00543970988213962	0.0810564663023679	74.3619897412587	6.50291113340773e-18	1.24712829716493e-13
MRPS16	0	0.0810564663023679	91.0955180434138	1.36901417587232e-21	2.62549538648794e-17
SPATA20	0.000906618313689937	0.22040072859745	267.683341889724	3.62929867541105e-60	6.96026899970331e-56
KRTAP10-4	0	0.112021857923497	128.759226265191	7.65650097941709e-30	1.46836375783261e-25
SRSF5	0.000906618313689937	0.114754098360656	129.083799661527	6.50147060623964e-30	1.24685203286464e-25
MICA	0	0.110200364298725	126.509578085074	2.37850986762151e-29	4.56150622412453e-25
LRRN3	0	0.10200364298725	116.439530497623	3.8081508916268e-27	7.30327177996188e-23
STUB1	0	0.287795992714026	368.317314247727	4.35080057578132e-82	8.34396534423342e-78
ZFAT	0.00271985494106981	0.448087431693989	623.558024034682	1.25864549434975e-137	2.41383032906395e-133
C7orf73	0	0.111111111111111	127.633860551138	1.34982661394651e-29	2.58869748022662e-25
RIMS4	0	0.187613843351548	226.099925863946	4.22585656695139e-51	8.10434772409938e-47
FAM72D	0	0.173952641165756	207.912860530864	3.91950364831922e-47	7.5168240967466e-43
TMEM155	0.000906618313689937	0.0728597449908925	78.349685270707	8.63231069355257e-19	1.65550454480951e-14
WHSC1L1	0.000906618313689937	0.347905282331512	458.546409784521	9.95906753487557e-102	1.90994997183844e-97
THEG	0	0.10655737704918	122.023250109717	2.28148539532661e-28	4.37543269115737e-24
SDR42E2	0	0.272313296903461	345.263483862121	4.55620159568171e-77	8.73788342019838e-73
INSL4	0	0.164845173041894	195.938246853666	1.60783640585821e-44	3.08350865915487e-40
DCUN1D3	0	0.281420765027322	358.774384653573	5.20546369945506e-80	9.98303828281491e-76
TPPP3	0	0.311475409836066	404.391715880744	6.09433304149247e-90	1.16877119069743e-85
TRPM6	0	0.100182149362477	114.213529880073	1.17005360366453e-26	2.24392880110784e-22
NEK5	0.00181323662737987	0.200364298724954	237.005963840794	1.76829942338962e-53	3.39124463417661e-49
CIDEC	0	0.0783242258652095	87.8305099254412	7.13104526287773e-21	1.36759186051469e-16
LMBR1	0.000906618313689937	0.13023679417122	148.414571508227	3.85042414649014e-34	7.38434342813879e-30
IRS1	0	0.0500910746812386	54.6291928688414	1.45557287588832e-13	2.79149766137862e-09
JAKMIP2	0	0.0938069216757741	106.456001642844	5.85787389460085e-25	1.12342305550655e-20
ZNF564	0	0.0710382513661202	79.1690868026161	5.70152621815275e-19	1.09343869811733e-14
TMEM19	0.000906618313689937	0.0974499089253188	107.853706795792	2.8936786217746e-25	5.54949686083933e-21
MCMDC2	0.00271985494106981	0.373406193078324	493.584665000553	2.36502418207388e-109	4.53564337638129e-105
OLFML1	0	0.119307832422587	137.801334077567	8.05447961614703e-32	1.54468810078468e-27
OR4A47	0	0.0846994535519126	95.4633593484203	1.50654005036232e-22	2.88924250858486e-18
COL28A1	0.00181323662737987	0.133879781420765	149.976401508934	1.7543563092108e-34	3.36450452980447e-30
KCNQ1	0.00181323662737987	0.124772313296903	138.539241684809	5.55468458581276e-32	1.06527740986717e-27
FAM166B	0	0.11384335154827	131.013213586699	2.45963552571946e-30	4.71708901122478e-26
GFM1	0.000906618313689937	0.126593806921676	143.83726972109	3.85628831958648e-33	7.39558973930295e-29
COA6	0.000906618313689937	0.54735883424408	824.160440224479	3.01469317795768e-181	5.78157857668724e-177
CARD6	0	0.126593806921676	146.913664738406	8.19604965506095e-34	1.57183840284759e-29
SLC7A11	0.00271985494106981	0.0728597449908925	72.6771117406759	1.52694744792402e-17	2.92837981562869e-13
PIK3CG	0	0.103825136612022	118.669803534703	1.23698351594154e-27	2.37228698687269e-23
MARVELD2	0.00181323662737987	0.126593806921676	140.817644067979	1.76367059032431e-32	3.38236745812396e-28
KCNH3	0	0.058287795992714	64.1683786751084	1.14227452372695e-15	2.19065408160354e-11
UPF1	0	0.075591985428051	84.5747805666215	3.69954185087099e-20	7.09498136160038e-16
FAM171A2	0	0.165755919854281	197.130368795606	8.832258765274e-45	1.69385058600425e-40
ANKRD42	0.000906618313689937	0.20856102003643	251.337034510188	1.32726348968887e-56	2.54542592052531e-52
MRPL49	0	0.0883424408014572	99.8478501098372	1.64565900586024e-23	3.15604484143877e-19
AFF1	0	0.0774134790528233	86.7442376274021	1.2350313019115e-20	2.36854303080587e-16
CBX1	0	0.183060109289617	220.007252019664	9.01159656574711e-50	1.72824398937898e-45
C19orf53	0.000906618313689937	0.0737704918032787	79.4286801049336	4.99950714863977e-19	9.58805480966135e-15
ANKEF1	0	0.162112932604736	192.368954664852	9.66620097511021e-44	1.85378402300664e-39
RGN	0.00181323662737987	0.0455373406193078	43.7278960750397	3.77354469791686e-11	7.23690402166495e-07
HTR3E	0	0.122950819672131	142.348671243786	8.15911456088885e-33	1.56475499048726e-28
C11orf54	0.000906618313689937	0.228597449908925	279.127899921717	1.16316920101916e-62	2.23072589371454e-58
DCSTAMP	0.00181323662737987	0.450819672131148	632.000538170693	1.83537037228294e-139	3.51987329996422e-135
ERAP1	0	0.120218579234973	138.93651861976	4.5475623956484e-32	8.7213151623745e-28
SPRED3	0	0.092896174863388	105.352014377528	1.02256423556152e-24	1.96107369095988e-20
GAB4	0.000906618313689937	0.176684881602914	208.382331368058	3.09600464313027e-47	5.93751770459523e-43
CHURC1	0	0.121129326047359	140.072801944905	2.56621872284125e-32	4.92149426666495e-28
MROH6	0.00181323662737987	0.427140255009107	589.276553009014	3.59972183470764e-130	6.90354653460231e-126
REEP6	0	0.102914389799636	117.554132216331	2.17093427110123e-27	4.16341774511794e-23
WNT11	0	0.201275045537341	244.562610320648	3.98007225133471e-55	7.63298256360971e-51
C4orf27	0	0.0947176684881603	107.561043750022	3.354137196678e-25	6.43256431578907e-21
EMP1	0.000906618313689937	0.122950819672131	139.277812782849	3.82950125404003e-32	7.34421750499797e-28
FCF1	0	0.114754098360656	132.141838278508	1.39302108484303e-30	2.67153583651196e-26
OR8K5	0	0.0655737704918033	72.7159164761831	1.49721726795334e-17	2.87136327648092e-13
AGL	0.00453309156844968	0.10655737704918	107.453341800975	3.54145456103883e-25	6.79180155716027e-21
TNRC6A	0.000906618313689937	0.278688524590164	351.43212589162	2.06669171193282e-78	3.96350136514476e-74
TUSC3	0.00453309156844968	0.35063752276867	449.723637332457	8.28437568078016e-100	1.58877756806002e-95
DNAJC18	0	0.0883424408014572	99.8478501098372	1.64565900586024e-23	3.15604484143877e-19
ARMC8	0	0.10655737704918	122.023250109717	2.28148539532661e-28	4.37543269115737e-24
TRIM49C	0	0.209471766848816	255.775131222782	1.43042530609038e-57	2.74326965202013e-53
GANC	0.000906618313689937	0.0938069216757741	103.433844431329	2.69235903997965e-24	5.16340616687297e-20
GNL1	0	0.121129326047359	140.072801944905	2.56621872284125e-32	4.92149426666495e-28
BBOF1	0.00181323662737987	0.112932604735883	123.838777644333	9.13742948039245e-29	1.75237622574966e-24
CRYGA	0	0.0500910746812386	54.6291928688414	1.45557287588832e-13	2.79149766137862e-09
WDR34	0.000906618313689937	0.0974499089253188	107.853706795792	2.8936786217746e-25	5.54949686083933e-21
ANKRD22	0.000906618313689937	0.087431693989071	95.7401890702181	1.30994059830759e-22	2.5122040794343e-18
NPEPL1	0	0.257741347905282	323.939102289011	2.00860991096482e-72	3.85211208724833e-68
SPSB1	0	0.122950819672131	142.348671243786	8.15911456088885e-33	1.56475499048726e-28
SLC6A20	0	0.105646630236794	120.904360975029	4.0100522805236e-28	7.69047826358816e-24
GRK6	0	0.114754098360656	132.141838278508	1.39302108484303e-30	2.67153583651196e-26
SH2D7	0.000906618313689937	0.0828779599271403	90.2765968422046	2.07087698371149e-21	3.97152787936189e-17
VDAC3	0	0.309653916211293	401.580973746402	2.49332113851812e-89	4.78169127945005e-85
ATP6V1A	0	0.087431693989071	98.7501616272355	2.86453575608321e-23	5.49360667301638e-19
IYD	0.000906618313689937	0.166666666666667	195.1907681178	2.34086569310966e-44	4.48931222624571e-40
RP11-1099M24.7	0	0.245901639344262	306.873266010478	1.04802977603413e-68	2.00991150447825e-64
RFX4	0.000906618313689937	0.0801457194899818	87.011142181804	1.07911517927719e-20	2.06952709081779e-16
PPIAL4F	0	0.173952641165756	207.912860530864	3.91950364831922e-47	7.5168240967466e-43
CA3	0.00181323662737987	0.395264116575592	533.751851601493	4.31239514803037e-118	8.27031141489264e-114
HIST1H4L	0	0.114754098360656	132.141838278508	1.39302108484303e-30	2.67153583651196e-26
ECHDC1	0	0.169398907103825	201.910692604669	7.99623712236527e-46	1.53351835532721e-41
RAB3IL1	0	0.112021857923497	128.759226265191	7.65650097941709e-30	1.46836375783261e-25
SPATA22	0	0.225865209471767	278.510240095938	1.58578268362814e-62	3.04121403066205e-58
CDK18	0	0.548269581056466	829.660625475862	1.92066747077993e-182	3.68345607546175e-178
HAO1	0.000906618313689937	0.16120218579235	188.055991897413	8.44650851413044e-43	1.61987140283994e-38
SPTB	0.00181323662737987	0.120218579234973	132.86288031251	9.687705773961e-31	1.85790821333024e-26
ADH1B	0	0.075591985428051	84.5747805666215	3.69954185087099e-20	7.09498136160038e-16
SRPRB	0.00181323662737987	0.0947176684881603	101.588260662618	6.83491572107118e-24	1.31080013698703e-19
TOB1	0.000906618313689937	0.225865209471767	275.301309282947	7.93510600521993e-62	1.52179462968108e-57
MAPRE1	0	0.156648451730419	185.262045352533	3.44026136370091e-42	6.59773324330561e-38
IL12RB1	0	0.0728597449908925	81.3282939023744	1.91169921745354e-19	3.6662567592324e-15
DCTN1	0	0.0473588342440801	51.4674212860382	7.2795130984703e-13	1.39606502202463e-08
TMEM159	0	0.277777777777778	353.352920942225	7.8886622694592e-79	1.51288765003689e-74
COASY	0	0.16120218579235	191.181542677073	1.75561749312807e-43	3.36692322832101e-39
CASC3	0	0.209471766848816	255.775131222782	1.43042530609038e-57	2.74326965202013e-53
MTG1	0	0.122040072859745	141.21018562702	1.44737799576088e-32	2.77578152027022e-28
DEGS1	0	0.544626593806922	822.073158775531	8.57116477147107e-181	1.64377797987272e-176
NDUFV3	0	0.10655737704918	122.023250109717	2.28148539532661e-28	4.37543269115737e-24
CTC-512J12.6	0.000906618313689937	0.0828779599271403	90.2765968422046	2.07087698371149e-21	3.97152787936189e-17
COX15	0	0.0856102003642987	96.5579176558098	8.66710083014542e-23	1.66217659720529e-18
EPHA2	0.000906618313689937	0.126593806921676	143.83726972109	3.85628831958648e-33	7.39558973930295e-29
GAS7	0.00181323662737987	0.256830601092896	316.152375304584	9.97729535678463e-71	1.91344570352416e-66
C5orf22	0	0.146630236794171	172.341330326104	2.27937899265057e-39	4.37139303210526e-35
MMP26	0.00362647325475975	0.12568306010929	133.808904668438	6.01555876296273e-31	1.15366385956099e-26
NUP62	0.000906618313689937	0.0701275045537341	75.1190157792438	4.43177318760647e-18	8.49925461919169e-14
BZW2	0	0.132969034608379	154.945195560807	1.43936270435889e-35	2.76040979441948e-31
CLRN1	0	0.12568306010929	145.770755533448	1.456993559777e-33	2.79422224894033e-29
ZNF81	0	0.0437158469945355	47.2656407481687	6.19893609935481e-12	1.18883196513427e-07
C10orf131	0	0.0819672131147541	92.1859223559541	7.89040688660219e-22	1.51322223271257e-17
BRAP	0	0.0619307832422587	68.4340803164589	1.31190567308795e-16	2.51597269984807e-12
SNCB	0	0.114754098360656	132.141838278508	1.39302108484303e-30	2.67153583651196e-26
NFATC2	0.000906618313689937	0.240437158469945	295.846961116105	2.64605817177479e-66	5.07461036182969e-62
FAH	0.000906618313689937	0.0901639344262295	99.0310802395469	2.48569926082112e-23	4.76707404240274e-19
BDP1	0.000906618313689937	0.12568306010929	142.695736210462	6.8510512206153e-33	1.3138946030896e-28
SLC32A1	0	0.179417122040073	215.15500763766	1.03098527212307e-48	1.97722355487762e-44
IL19	0	0.551001821493625	835.376184406122	1.09861894486755e-183	2.10693141246699e-179
LUZP4	0	0.0245901639344262	25.4678523112387	4.49815974658681e-07	0.00862657076200418
LEKR1	0	0.126593806921676	146.913664738406	8.19604965506095e-34	1.57183840284759e-29
ZNF507	0	0.087431693989071	98.7501616272355	2.86453575608321e-23	5.49360667301638e-19
C12orf43	0.00634632819582956	0.0655737704918033	54.0806599581646	1.92425969360239e-13	3.69034524039066e-09
MAPK3	0	0.264116575591985	333.224578670884	1.90756787381081e-74	3.65833366839437e-70
SLC4A8	0.000906618313689937	0.0619307832422587	65.4838607740665	5.85918347523156e-16	1.12367420687991e-11
HOXA13	0	0.126593806921676	146.913664738406	8.19604965506095e-34	1.57183840284759e-29
TRPA1	0.00181323662737987	0.37431693989071	498.448278943271	2.06820943915781e-110	3.96641206241685e-106
RANBP6	0	0.165755919854281	197.130368795606	8.832258765274e-45	1.69385058600425e-40
RBMX	0	0.0355191256830601	37.8697046244922	7.56306185997004e-10	1.45044400350505e-05
GPR108	0	0.0710382513661202	79.1690868026161	5.70152621815275e-19	1.09343869811733e-14
EVX2	0	0.0400728597449909	43.0797413251017	5.25536188251263e-11	1.00787330182827e-06
CDYL2	0.00181323662737987	0.335154826958106	434.826339458409	1.44693537569324e-96	2.7749326635045e-92
EPS8L2	0	0.122040072859745	141.21018562702	1.44737799576088e-32	2.77578152027022e-28
ELAC2	0.000906618313689937	0.244990892531876	302.337362133743	1.01987127469367e-67	1.95590913060752e-63
TIMM21	0	0.148451730418944	174.680172552384	7.03151855047945e-40	1.34850462761095e-35
CENPF	0	0.546448087431694	825.862152895553	1.28609806939325e-181	2.46647887748238e-177
RAX	0	0.136612021857924	159.559271546042	1.41235216549096e-36	2.70860898297856e-32
PIGC	0.000906618313689937	0.527322404371585	782.968100646081	2.72365629298444e-172	5.22342803868556e-168
RAB23	0	0.116575591985428	134.402357463757	4.46130818695154e-31	8.55589684093566e-27
C3	0	0.0710382513661202	79.1690868026161	5.70152621815275e-19	1.09343869811733e-14
HOXD12	0	0.0400728597449909	43.0797413251017	5.25536188251263e-11	1.00787330182827e-06
YOD1	0	0.550091074681239	833.468612126949	2.85473880623111e-183	5.47481808259002e-179
HS3ST3A1	0.00271985494106981	0.250455373406193	303.779572727438	4.94705392771522e-68	9.48746002257225e-64
UBE2O	0.000906618313689937	0.211293260473588	255.090068292833	2.01744925499863e-57	3.86906418123637e-53
PRR23D1	0	0.341530054644809	451.657932555487	3.14271530801702e-100	6.02709941771504e-96
MIA-RAB4B	0	0.0783242258652095	87.8305099254412	7.13104526287773e-21	1.36759186051469e-16
FZR1	0	0.0938069216757741	106.456001642844	5.85787389460085e-25	1.12342305550655e-20
KIAA0319	0.000906618313689937	0.13023679417122	148.414571508227	3.85042414649014e-34	7.38434342813879e-30
SLC8A3	0.00181323662737987	0.119307832422587	131.730966310142	1.71334079166351e-30	3.28584497025228e-26
TMEM150A	0	0.0473588342440801	51.4674212860382	7.2795130984703e-13	1.39606502202463e-08
LUZP1	0.00271985494106981	0.112932604735883	120.908843465416	4.00100184597736e-28	7.67312134021538e-24
SLC9A5	0	0.310564663023679	402.985589207887	1.23314849331021e-89	2.36493218047032e-85
KCND3	0.000906618313689937	0.10655737704918	118.978632810739	1.05863740360783e-27	2.0302548126391e-23
MON2	0	0.0792349726775956	88.9178131914755	4.11560709029152e-21	7.89291127776108e-17
RXFP4	0	0.517304189435337	766.351980928391	1.11671614787691e-168	2.14163822839834e-164
OR10R2	0	0.517304189435337	766.351980928391	1.11671614787691e-168	2.14163822839834e-164
RP11-404P21.8	0.000906618313689937	0.110200364298725	123.458912535907	1.10654078262404e-28	2.12212391291638e-24
PPME1	0	0.194899817850638	235.911995383282	3.06269916245369e-53	5.87364445375369e-49
SNF8	0	0.205828779599271	250.779170602092	1.7562021296358e-56	3.36804444421554e-52
LTBP1	0.00181323662737987	0.0573770491803279	57.3515491340932	3.6447612764253e-14	6.98992317592844e-10
PPIF	0	0.101092896174863	115.325996882723	6.67677841881049e-27	1.28047256515948e-22
ZNF805	0	0.0883424408014572	99.8478501098372	1.64565900586024e-23	3.15604484143877e-19
C18orf25	0.000906618313689937	0.120218579234973	135.869874538388	2.13044571827045e-31	4.08576879849907e-27
ZBTB39	0	0.0537340619307832	58.8588356023068	1.69399372730836e-14	3.24874117023197e-10
PTS	0	0.258652094717668	325.261446830304	1.03483925186344e-72	1.98461471722371e-68
SEMA3E	0.00362647325475975	0.112932604735883	118.039332837476	1.69983534006739e-27	3.25994421518124e-23
MALRD1	0.013599274705349	0.123861566484517	102.975362571007	3.39342196151077e-24	6.50790463778535e-20
AP1M2	0	0.0746812386156648	83.4915931402682	6.39875086724428e-20	1.22715244132011e-15
ADORA2A	0	0.180327868852459	216.366251446347	5.61081856856411e-49	1.07604278507922e-44
NPAT	0	0.254098360655738	318.663485234103	2.83155477801808e-71	5.43035575328307e-67
MAGEA2B	0	0.0373406193078324	39.9507379401292	2.6044915643605e-10	4.99489392213057e-06
FKBP9	0	0.133879781420765	156.097028769352	8.06240533470277e-36	1.5462080950893e-31
TULP3	0.000906618313689937	0.134790528233151	154.161438216704	2.13524818366549e-35	4.09497896663368e-31
GZMA	0	0.131147540983607	152.644890967893	4.58017460300657e-35	8.783858853646e-31
TGFBRAP1	0	0.040983606557377	44.1247278223639	3.08104059265001e-11	5.90881964858419e-07
STX1B	0	0.268670309653916	339.898822163968	6.71282527497972e-76	1.28738563123561e-71
SH3GLB2	0	0.0965391621129326	109.774298314311	1.09807945314936e-25	2.10589677524984e-21
ATP1B2	0	0.252276867030965	316.033903348434	1.05881373692321e-70	2.03059298467133e-66
MALSU1	0	0.129326047358834	150.349058019671	1.45433524206431e-34	2.78912412723093e-30
RALYL	0.00271985494106981	0.39799635701275	535.043141091884	2.25837387385686e-118	4.33110941528269e-114
BCCIP	0.000906618313689937	0.104735883424408	116.745007665415	3.26453292695244e-27	6.26072124730939e-23
RP11-87C12.2	0	0.0728597449908925	81.3282939023744	1.91169921745354e-19	3.6662567592324e-15
RP11-108O10.8	0	0.262295081967213	330.564650814913	7.24112376980906e-74	1.38870271657398e-69
CCDC85A	0.000906618313689937	0.0628415300546448	66.5502171166491	3.41092499852483e-16	6.54147196217092e-12
AGTR2	0	0.0245901639344262	25.4678523112387	4.49815974658681e-07	0.00862657076200418
FIBCD1	0	0.0974499089253188	110.882513695638	6.27833544390129e-26	1.20405917143139e-21
CDKL3	0	0.100182149362477	114.213529880073	1.17005360366453e-26	2.24392880110784e-22
AC104532.2	0	0.0828779599271403	93.2773630892577	4.54561443226851e-22	8.71757935820455e-18
RPL39	0	0.0209471766848816	21.366940797415	3.79254652448788e-06	0.0727334572466286
ERI3	0	0.0919854280510018	104.249080504143	1.78415788957303e-24	3.42165800062316e-20
WNK4	0	0.162112932604736	192.368954664852	9.66620097511021e-44	1.85378402300664e-39
ARHGAP18	0	0.163934426229508	194.747305013788	2.92524505146981e-44	5.6100349597088e-40
ZNF793	0	0.0910746812386157	103.147198577794	3.11149283476603e-24	5.96722095851429e-20
ABHD4	0	0.0965391621129326	109.774298314311	1.09807945314936e-25	2.10589677524984e-21
LRRC6	0.00271985494106981	0.451730418943534	630.218762374665	4.4796341530578e-139	8.59104237873425e-135
LARP4	0	0.0591985428051002	65.2332953689644	6.65358094439778e-16	1.27602375351661e-11
GDF11	0	0.0573770491803279	63.1044660176753	1.96029135219058e-15	3.75944675523109e-11
PPL	0.00271985494106981	0.305100182149362	384.734631217488	1.15924219598917e-85	2.22319468346803e-81
TMCO3	0	0.209471766848816	255.775131222782	1.43042530609038e-57	2.74326965202013e-53
ADAMTS20	0	0.0719489981785064	80.2481794814122	3.30216578881196e-19	6.33289354978358e-15
PAQR8	0	0.122040072859745	141.21018562702	1.44737799576088e-32	2.77578152027022e-28
TMEM139	0	0.110200364298725	126.509578085074	2.37850986762151e-29	4.56150622412453e-25
STAC3	0	0.0564663023679417	62.041556368439	3.36285214548535e-15	6.44927784461180e-11
GRIK5	0	0.0783242258652095	87.8305099254412	7.13104526287773e-21	1.36759186051469e-16
PCBD1	0.000906618313689937	0.087431693989071	95.7401890702181	1.30994059830759e-22	2.5122040794343e-18
DPYSL4	0	0.112021857923497	128.759226265191	7.65650097941709e-30	1.46836375783261e-25
C5orf52	0.000906618313689937	0.0956284153005464	105.641634126938	8.8351746042954e-25	1.69440978561177e-20
LMO1	0	0.117486338797814	135.53425506436	2.52277621816039e-31	4.838180231188e-27
CYP2R1	0	0.114754098360656	132.141838278508	1.39302108484303e-30	2.67153583651196e-26
DIRC1	0	0.0473588342440801	51.4674212860382	7.2795130984703e-13	1.39606502202463e-08
GRIP2	0.000906618313689937	0.0846994535519126	92.4588548073424	6.87391450845508e-22	1.31827932443152e-17
VARS2	0.000906618313689937	0.126593806921676	143.83726972109	3.85628831958648e-33	7.39558973930295e-29
PRR12	0	0.075591985428051	84.5747805666215	3.69954185087099e-20	7.09498136160038e-16
ERCC6L	0	0.0145719489981785	14.2342813455208	0.000161403256632973	1
TRPM5	0	0.122040072859745	141.21018562702	1.44737799576088e-32	2.77578152027022e-28
ERGIC3	0	0.160291438979964	189.995303833906	3.18680958238681e-43	6.11166341710142e-39
MEP1B	0.00271985494106981	0.110200364298725	117.550514406778	2.1748977590695e-27	4.17101892234349e-23
EXO5	0	0.0892531876138433	100.946584812457	9.44977196481201e-24	1.81227726741165e-19
CCDC102A	0	0.311475409836066	404.391715880744	6.09433304149247e-90	1.16877119069743e-85
TMEM14A	0.000906618313689937	0.122950819672131	139.277812782849	3.82950125404003e-32	7.34421750499797e-28
SLC6A5	0.000906618313689937	0.1183970856102	133.603443918171	6.67144754350423e-31	1.27945020989324e-26
C16orf92	0	0.264116575591985	333.224578670884	1.90756787381081e-74	3.65833366839437e-70
COL1A1	0.000906618313689937	0.215846994535519	261.370648069019	8.62483027420466e-59	1.65406994998697e-54
COL9A3	0	0.246812386156648	308.177859768971	5.44715072766855e-69	1.04465456655227e-64
ARHGAP6	0	0.0610200364298725	67.3661451021741	2.25487908993277e-16	4.32440711867307e-12
YBX3	0	0.121129326047359	140.072801944905	2.56621872284125e-32	4.92149426666495e-28
YEATS2	0	0.122950819672131	142.348671243786	8.15911456088885e-33	1.56475499048726e-28
SNRPB	0	0.15391621129326	181.72433507503	2.03674991626507e-41	3.90607898941315e-37
FCRL2	0	0.519125683060109	770.00295327826	1.79520826904265e-169	3.44285041836999e-165
SMN1	0	0.122950819672131	142.348671243786	8.15911456088885e-33	1.56475499048726e-28
TTR	0	0.110200364298725	126.509578085074	2.37850986762151e-29	4.56150622412453e-25
C1orf68	0	0.520947176684882	773.66289062781	2.87304551359987e-170	5.50992668598183e-166
OCEL1	0	0.0701275045537341	78.0910145866485	9.84005435570406e-19	1.88712562433692e-14
KIAA1324L	0	0.107468123861566	123.143214869447	1.29738122602225e-28	2.48811771526547e-24
CEMIP	0	0.0910746812386157	103.147198577794	3.11149283476603e-24	5.96722095851429e-20
PLXDC2	0.00181323662737987	0.112021857923497	122.715768069433	1.60927308721462e-28	3.0862639266602e-24
AC018867.1	0	0.0446265938069217	48.3145964197624	3.63039809481072e-12	6.962377466228e-08
FIZ1	0	0.0910746812386157	103.147198577794	3.11149283476603e-24	5.96722095851429e-20
MAP9	0.000906618313689937	0.0828779599271403	90.2765968422046	2.07087698371149e-21	3.97152787936189e-17
LNPEP	0	0.119307832422587	137.801334077567	8.05447961614703e-32	1.54468810078468e-27
LRP8	0.000906618313689937	0.087431693989071	95.7401890702181	1.30994059830759e-22	2.5122040794343e-18
AC005480.1	0.000906618313689937	0.112932604735883	126.830563870709	2.02330747296001e-29	3.88029907164271e-25
NPHS1	0	0.0919854280510018	104.249080504143	1.78415788957303e-24	3.42165800062316e-20
CARNS1	0	0.172131147540984	205.508412561015	1.3117537724257e-46	2.51568138475801e-42
NFS1	0	0.164845173041894	195.938246853666	1.60783640585821e-44	3.08350865915487e-40
PARP3	0	0.111111111111111	127.633860551138	1.34982661394651e-29	2.58869748022662e-25
FAM175B	0.000906618313689937	0.10655737704918	118.978632810739	1.05863740360783e-27	2.0302548126391e-23
PHF19	0	0.0965391621129326	109.774298314311	1.09807945314936e-25	2.10589677524984e-21
RP5-860F19.8	0	0.154826958105647	182.902410158011	1.12650667767553e-41	2.16041450644613e-37
PRSS46	0	0.111111111111111	127.633860551138	1.34982661394651e-29	2.58869748022662e-25
DEPTOR	0.00362647325475975	0.455373406193078	633.471422781461	8.78662263939162e-140	1.68509848978252e-135
PSTPIP1	0	0.0819672131147541	92.1859223559541	7.89040688660219e-22	1.51322223271257e-17
ACPT	0	0.0737704918032787	82.4094313553584	1.10624684270184e-19	2.12156019493359e-15
PECAM1	0.00271985494106981	0.231329690346084	276.62980465412	4.07413789321271e-62	7.81338165160334e-58
RHNO1	0.000906618313689937	0.132969034608379	151.859315718591	6.80101437278417e-35	1.30429853641255e-30
TLN1	0	0.11384335154827	131.013213586699	2.45963552571946e-30	4.71708901122478e-26
GFRA2	0	0.346994535519126	460.435950015064	3.86385758729826e-102	7.4101060809206e-98
LMAN2	0	0.115664845173042	133.271552386961	7.88536310772085e-31	1.5122549367987e-26
GOLGA7B	0	0.0846994535519126	95.4633593484203	1.50654005036232e-22	2.88924250858486e-18
TSHZ3	0.00543970988213962	0.100182149362477	97.0402834683899	6.79310995325414e-23	1.30278262683508e-18
ITGB7	0	0.0564663023679417	62.041556368439	3.36285214548535e-15	6.44927784461180e-11
GPR68	0	0.108378870673953	124.264256770829	7.37393296826173e-29	1.41417286465323e-24
CH17-140K24.5	0	0.0938069216757741	106.456001642844	5.85787389460085e-25	1.12342305550655e-20
DRG2	0	0.221311475409836	272.15299677126	3.85194220243342e-61	7.38725475582681e-57
OR6A2	0	0.119307832422587	137.801334077567	8.05447961614703e-32	1.54468810078468e-27
CASQ2	0	0.111111111111111	127.633860551138	1.34982661394651e-29	2.58869748022662e-25
SDPR	0	0.046448087431694	50.4154862878962	1.2440860764818e-12	2.3859082774768e-08
RSF1	0.000906618313689937	0.228597449908925	279.127899921717	1.16316920101916e-62	2.23072589371454e-58
BIRC2	0	0.230418943533698	284.900121845255	6.42402340284648e-64	1.2319992081979e-59
CDRT4	0	0.231329690346084	286.182036914555	3.37656129497366e-64	6.47556925150048e-60
KRTAP2-4	0	0.180327868852459	216.366251446347	5.61081856856411e-49	1.07604278507922e-44
KRT8	0	0.0610200364298725	67.3661451021741	2.25487908993277e-16	4.32440711867307e-12
A2M	0	0.1183970856102	136.667246747984	1.42583956641807e-31	2.73447512047657e-27
FAM167A	0.000906618313689937	0.348816029143898	460.01555369681	4.76986967791936e-102	9.14765606831375e-98
HSD17B2	0	0.335154826958106	441.489545614364	5.1317432137879e-98	9.84165713540244e-94
PRSS48	0	0.0783242258652095	87.8305099254412	7.13104526287773e-21	1.36759186051469e-16
SC5D	0	0.248633879781421	310.791107567942	1.46854727229749e-69	2.81637995881213e-65
RTN4RL2	0.000906618313689937	0.112021857923497	125.705587786961	3.56658444719828e-29	6.83999565283686e-25
BMP15	0.000906618313689937	0.040983606557377	41.2536481252563	1.33702076987686e-10	2.56413843246984e-06
CYTL1	0	0.104735883424408	119.786545952838	7.04474435619752e-28	1.35104107263156e-23
CDH7	0	0.135701275045537	158.404065132319	2.52552396420826e-36	4.8434498585586e-32
TMEM8B	0	0.112021857923497	128.759226265191	7.65650097941709e-30	1.46836375783261e-25
EIF2AK3	0	0.0418943533697632	45.1707065722392	1.80586172080178e-11	3.46328160815365e-07
TGFB3	0	0.115664845173042	133.271552386961	7.88536310772085e-31	1.5122549367987e-26
PROK1	0	0.104735883424408	119.786545952838	7.04474435619752e-28	1.35104107263156e-23
DRP2	0	0.0191256830601093	19.323057540412	1.10365524407882e-05	0.211659002709436
P2RY13	0	0.120218579234973	138.93651861976	4.5475623956484e-32	8.7213151623745e-28
ZNF737	0	0.0573770491803279	63.1044660176753	1.96029135219058e-15	3.75944675523109e-11
NR2F2	0	0.1183970856102	136.667246747984	1.42583956641807e-31	2.73447512047657e-27
ZSCAN12	0	0.111111111111111	127.633860551138	1.34982661394651e-29	2.58869748022662e-25
FARP2	0.000906618313689937	0.0746812386156648	80.5087277506493	2.894237479152e-19	5.55056863751771e-15
CLEC2B	0	0.124772313296903	144.628954610224	2.58869796121445e-33	4.96460495001707e-29
ENPP4	0	0.12568306010929	145.770755533448	1.456993559777e-33	2.79422224894033e-29
FRG2C	0	0.104735883424408	119.786545952838	7.04474435619752e-28	1.35104107263156e-23
BROX	0	0.545537340619308	823.966473246714	3.32210611612737e-181	6.37113510950907e-177
C10orf2	0	0.0828779599271403	93.2773630892577	4.54561443226851e-22	8.71757935820455e-18
SEC24A	0	0.0956284153005464	108.667142153936	1.91960691060315e-25	3.68142213315472e-21
FCGR2B	0	0.530965391621129	793.954281017166	1.11305201294598e-174	2.1346111504278e-170
IL22RA2	0	0.167577413479053	199.518159982608	2.66060738906744e-45	5.10251285075354e-41
RSC1A1	0	0.12568306010929	145.770755533448	1.456993559777e-33	2.79422224894033e-29
CELA1	0	0.0591985428051002	65.2332953689644	6.65358094439778e-16	1.27602375351661e-11
SDS	0	0.0737704918032787	82.4094313553584	1.10624684270184e-19	2.12156019493359e-15
PGLYRP4	0.000906618313689937	0.52367941712204	775.598422923424	1.09019911332177e-170	2.09078385952849e-166
STRAP	0	0.127504553734062	148.057683820901	4.60809811805662e-34	8.83741057080899e-30
FAM222B	0	0.183970856102004	221.22334797327	4.89264258550011e-50	9.38310995047211e-46
COL6A5	0.00725294650951949	0.0947176684881603	85.3564185754798	2.49151914309271e-20	4.7782354126232e-16
IMMT	0	0.040983606557377	44.1247278223639	3.08104059265001e-11	5.90881964858419e-07
GALR1	0	0.155737704918033	184.081646347491	6.22709035060731e-42	1.19423138743947e-37
BMPR2	0.000906618313689937	0.0482695810564663	49.6162069998173	1.86962838220145e-12	3.58557331138594e-08
ARTN	0	0.092896174863388	105.352014377528	1.02256423556152e-24	1.96107369095988e-20
FOXE3	0	0.0837887067395264	94.3698416242314	2.61749973278805e-22	5.01984098754092e-18
TBL1X	0.00271985494106981	0.0673952641165756	66.2736522592819	3.92469912839416e-16	7.52678798843432e-12
ZMYND19	0	0.105646630236794	120.904360975029	4.0100522805236e-28	7.69047826358816e-24
NPY1R	0	0.087431693989071	98.7501616272355	2.86453575608321e-23	5.49360667301638e-19
STAMBPL1	0.000906618313689937	0.0837887067395264	91.3671965272964	1.19338485895345e-21	2.28867348250093e-17
RP4-608O15.3	0	0.517304189435337	766.351980928391	1.11671614787691e-168	2.14163822839834e-164
ZNF680	0	0.0883424408014572	99.8478501098372	1.64565900586024e-23	3.15604484143877e-19
GAGE12F	0	0.0400728597449909	43.0797413251017	5.25536188251263e-11	1.00787330182827e-06
FGD2	0.00543970988213962	0.12568306010929	128.154649529346	1.03829122159727e-29	1.99123490477924e-25
FAM184B	0	0.0965391621129326	109.774298314311	1.09807945314936e-25	2.10589677524984e-21
C7orf77	0	0.10655737704918	122.023250109717	2.28148539532661e-28	4.37543269115737e-24
MRPS34	0	0.287795992714026	368.317314247727	4.35080057578132e-82	8.34396534423342e-78
OGDH	0	0.116575591985428	134.402357463757	4.46130818695154e-31	8.55589684093566e-27
MRPL34	0	0.0683060109289618	75.9379264815224	2.92723428044392e-18	5.61384990303535e-14
GAB1	0	0.075591985428051	84.5747805666215	3.69954185087099e-20	7.09498136160038e-16
VPS50	0.000906618313689937	0.109289617486339	122.337210717186	1.94756876838523e-28	3.73504738400919e-24
NPY2R	0	0.0819672131147541	92.1859223559541	7.89040688660219e-22	1.51322223271257e-17
MAP7D3	0.000906618313689937	0.0336976320582878	32.9653671138806	9.3815262749635e-09	0.00017991891090125
C2orf40	0	0.0373406193078324	39.9507379401292	2.6044915643605e-10	4.99489392213057e-06
TUBB	0	0.126593806921676	146.913664738406	8.19604965506095e-34	1.57183840284759e-29
SGCE	0	0.109289617486339	125.386377334497	4.18901417741995e-29	8.03369138945598e-25
CCDC144A	0	0.233151183970856	288.749821959665	9.31023812605075e-65	1.78551746781401e-60
WDR26	0	0.543715846994536	820.182205058416	2.20878822700094e-180	4.2360140617424e-176
CPS1	0.00271985494106981	0.0482695810564663	44.2233103046903	2.92971721739857e-11	5.61861167952698e-07
RIPPLY2	0.000906618313689937	0.158469945355191	184.504497078559	5.03467371527199e-42	9.65549725114862e-38
FAM72B	0	0.173952641165756	207.912860530864	3.91950364831922e-47	7.5168240967466e-43
SOX1	0	0.206739526411658	252.026262312447	9.39081339105463e-57	1.80097019213646e-52
GNA13	0	0.222222222222222	273.421846359346	2.03774484228314e-61	3.90798705853061e-57
PPP2R5B	0	0.0883424408014572	99.8478501098372	1.64565900586024e-23	3.15604484143877e-19
MYL6B	0	0.0591985428051002	65.2332953689644	6.65358094439778e-16	1.27602375351661e-11
MOCOS	0.00181323662737987	0.119307832422587	131.730966310142	1.71334079166351e-30	3.28584497025228e-26
SH2B3	0	0.0628415300546448	69.5030239141286	7.62974494778101e-17	1.46323248608544e-12
CHMP1B	0	0.136612021857924	159.559271546042	1.41235216549096e-36	2.70860898297856e-32
COPRS	0.000906618313689937	0.165755919854281	193.998684252186	4.26138850534021e-44	8.17249087554145e-40
IRF2BP1	0	0.0774134790528233	86.7442376274021	1.2350313019115e-20	2.36854303080587e-16
CRBN	0.000906618313689937	0.102914389799636	114.515712207487	1.00467028907808e-26	1.92675668039394e-22
DICER1	0.000906618313689937	0.120218579234973	135.869874538388	2.13044571827045e-31	4.08576879849907e-27
NR5A1	0	0.0974499089253188	110.882513695638	6.27833544390129e-26	1.20405917143139e-21
WBSCR16	0	0.0828779599271403	93.2773630892577	4.54561443226851e-22	8.71757935820455e-18
MAP3K15	0.00181323662737987	0.0564663023679417	56.2962627110318	6.23337940771856e-14	1.19543750281227e-09
RBM43	0	0.0446265938069217	48.3145964197624	3.63039809481072e-12	6.962377466228e-08
AC004076.9	0.00181323662737987	0.0892531876138433	94.9987700444134	1.90503592300326e-22	3.65347789313565e-18
RPA1	0	0.227686703096539	281.062262144716	4.40668849559175e-63	8.45114719684586e-59
GOLGA8F	0	0.0956284153005464	108.667142153936	1.91960691060315e-25	3.68142213315472e-21
NEDD8	0	0.0992714025500911	113.102128002462	2.04942098346858e-26	3.93037956209604e-22
RGS18	0.000906618313689937	0.522768670309654	773.761669306264	2.73442072357536e-170	5.24407206367283e-166
CR1	0.000906618313689937	0.543715846994536	816.586820304331	1.33608358769401e-179	2.56234110447957e-175
PPHLN1	0.00271985494106981	0.0746812386156648	74.8211693142011	5.153415369792e-18	9.8832199961871e-14
MRPL37	0	0.0883424408014572	99.8478501098372	1.64565900586024e-23	3.15604484143877e-19
HCK	0.000906618313689937	0.158469945355191	184.504497078559	5.03467371527199e-42	9.65549725114862e-38
GAS6	0.000906618313689937	0.204918032786885	246.350748510526	1.62193110935097e-55	3.11053948151329e-51
AP1G2	0	0.101092896174863	115.325996882723	6.67677841881049e-27	1.28047256515948e-22
MOG	0.00181323662737987	0.115664845173042	127.214467135126	1.66744688878909e-29	3.19782964331972e-25
ZNF709	0.000906618313689937	0.0737704918032787	79.4286801049336	4.99950714863977e-19	9.58805480966135e-15
CTC-490E21.12	0	0.0792349726775956	88.9178131914755	4.11560709029152e-21	7.89291127776108e-17
SHISA5	0	0.107468123861566	123.143214869447	1.29738122602225e-28	2.48811771526547e-24
INSL6	0	0.163023679417122	193.557541531234	5.31904204258399e-44	1.02008588292676e-39
AFAP1L2	0	0.0919854280510018	104.249080504143	1.78415788957303e-24	3.42165800062316e-20
CUL2	0.00181323662737987	0.0983606557377049	106.003166219318	7.36174852171553e-25	1.4118361314946e-20
TJP1	0	0.0956284153005464	108.667142153936	1.91960691060315e-25	3.68142213315472e-21
SRRM5	0	0.0774134790528233	86.7442376274021	1.2350313019115e-20	2.36854303080587e-16
NEK11	0.00181323662737987	0.0919854280510018	98.2885878873148	3.6164410872728e-23	6.93561071717178e-19
AP5S1	0	0.16120218579235	191.181542677073	1.75561749312807e-43	3.36692322832101e-39
TIFA	0	0.0728597449908925	81.3282939023744	1.91169921745354e-19	3.6662567592324e-15
TXN2	0.00271985494106981	0.194899817850638	226.514508057255	3.43158698049484e-51	6.581097511193e-47
CD81	0	0.122040072859745	141.21018562702	1.44737799576088e-32	2.77578152027022e-28
HOOK2	0	0.075591985428051	84.5747805666215	3.69954185087099e-20	7.09498136160038e-16
KRT75	0	0.0591985428051002	65.2332953689644	6.65358094439778e-16	1.27602375351661e-11
CEBPZOS	0	0.0528233151183971	57.7999282715382	2.90180302459607e-14	5.56507784057034e-10
HIST2H3A	0	0.403460837887067	554.650757778844	1.22537497201094e-122	2.35002412132258e-118
TM4SF19-TCTEX1D2	0.000906618313689937	0.13752276867031	157.623092031646	3.74108619546647e-36	7.1746551056656e-32
AC073333.1	0	0.131147540983607	152.644890967893	4.58017460300657e-35	8.783858853646e-31
DMBX1	0	0.087431693989071	98.7501616272355	2.86453575608321e-23	5.49360667301638e-19
ZNF771	0	0.271402550091075	343.920204014313	8.93581318690207e-77	1.71371025298408e-72
IL9	0	0.0956284153005464	108.667142153936	1.91960691060315e-25	3.68142213315472e-21
MAP3K7	0	0.178506375227687	213.944972339401	1.89331037776265e-48	3.63099064247321e-44
GFRAL	0.000906618313689937	0.119307832422587	134.736107353665	3.7710173000143e-31	7.23205697796743e-27
RFC4	0	0.129326047358834	150.349058019671	1.45433524206431e-34	2.78912412723093e-30
MED27	0	0.0974499089253188	110.882513695638	6.27833544390129e-26	1.20405917143139e-21
TMEM43	0.000906618313689937	0.0856102003642987	93.5515724516684	3.95753115320078e-22	7.58975324560846e-18
LY6G6D	0	0.110200364298725	126.509578085074	2.37850986762151e-29	4.56150622412453e-25
ALPK1	0.00181323662737987	0.0774134790528233	80.8568313903875	2.42677461745467e-19	4.65406836135457e-15
CARM1	0	0.0783242258652095	87.8305099254412	7.13104526287773e-21	1.36759186051469e-16
LRPPRC	0	0.0537340619307832	58.8588356023068	1.69399372730836e-14	3.24874117023197e-10
LMO7DN	0	0.18488160291439	222.440661507451	2.65476520024371e-50	5.09130870102739e-46
DDT	0	0.180327868852459	216.366251446347	5.61081856856411e-49	1.07604278507922e-44
TEX10	0	0.087431693989071	98.7501616272355	2.86453575608321e-23	5.49360667301638e-19
KIF22	0	0.264116575591985	333.224578670884	1.90756787381081e-74	3.65833366839437e-70
DEFB1	0	0.353369763205829	470.750404955928	2.20026701566163e-104	4.21967208263587e-100
AK9	0.000906618313689937	0.194899817850638	232.742176393404	1.50430084912363e-52	2.8849481684493e-48
VCX2	0	0.0564663023679417	62.041556368439	3.36285214548535e-15	6.44927784461180e-11
PSMF1	0	0.162112932604736	192.368954664852	9.66620097511021e-44	1.85378402300664e-39
CNTD2	0	0.0865209471766849	97.6535179466407	4.98385400169837e-23	9.55803520445713e-19
DTL	0	0.542805100182149	818.293607682811	5.68534947200198e-180	1.09033632174054e-175
TBX18	0	0.158469945355191	187.62633866331	1.04825458709507e-42	2.01034264713093e-38
KCNJ16	0.00181323662737987	0.238615664845173	290.066249969815	4.80973392680961e-65	9.22410772483547e-61
ASB8	0	0.0619307832422587	68.4340803164589	1.31190567308795e-16	2.51597269984807e-12
CHTF8	0	0.31511839708561	410.031383555666	3.60823717977266e-91	6.91987726336801e-87
SIRPG	0	0.159380692167577	188.810236404934	5.78142531668859e-43	1.10876174723454e-38
PAK6	0	0.0974499089253188	110.882513695638	6.27833544390129e-26	1.20405917143139e-21
IFNL2	0	0.0901639344262295	102.046367158732	5.42372800574511e-24	1.0401625569418e-19
EEF1A2	0	0.244990892531876	305.570022878883	2.01505770190249e-68	3.8644776607086e-64
SLC36A1	0	0.0938069216757741	106.456001642844	5.85787389460085e-25	1.12342305550655e-20
DPF1	0	0.0974499089253188	110.882513695638	6.27833544390129e-26	1.20405917143139e-21
KCNS2	0.00181323662737987	0.4408014571949	613.766864419425	1.69610375905187e-135	3.25278778910968e-131
PDZRN3	0.000906618313689937	0.116575591985428	131.341422675893	2.08480641669571e-30	3.99824174593903e-26
PIP4K2C	0	0.063752276867031	70.5729770331577	4.43551329395536e-17	8.50642739514759e-13
TSPEAR	0.00181323662737987	0.117486338797814	129.470487530462	5.35061322696044e-30	1.02614060466647e-25
WDR37	0	0.140255009107468	164.191390272646	1.37388869240086e-37	2.63484373428637e-33
PTPRU	0	0.0992714025500911	113.102128002462	2.04942098346858e-26	3.93037956209604e-22
CACNA1E	0.00181323662737987	0.520036429872495	764.712507843195	2.53754464246534e-168	4.86650311532003e-164
PRELID3A	0	0.139344262295082	163.031663346211	2.46209041077449e-37	4.72179698978332e-33
QTRTD1	0	0.087431693989071	98.7501616272355	2.86453575608321e-23	5.49360667301638e-19
LY75	0.00181323662737987	0.0446265938069217	42.6888253466835	6.41778718146973e-11	1.23080322566226e-06
BNIP3L	0	0.346994535519126	460.435950015064	3.86385758729826e-102	7.4101060809206e-98
CST9	0	0.159380692167577	188.810236404934	5.78142531668859e-43	1.10876174723454e-38
DCAF15	0	0.0746812386156648	83.4915931402682	6.39875086724428e-20	1.22715244132011e-15
WBSCR27	0	0.0856102003642987	96.5579176558098	8.66710083014542e-23	1.66217659720529e-18
SFTA3	0.000906618313689937	0.112021857923497	125.705587786961	3.56658444719828e-29	6.83999565283686e-25
CENPC	0.000906618313689937	0.0728597449908925	78.349685270707	8.63231069355257e-19	1.65550454480951e-14
TWIST2	0	0.063752276867031	70.5729770331577	4.43551329395536e-17	8.50642739514759e-13
MUC1	0	0.522768670309654	777.331826037277	4.5773971572953e-171	8.77853226826093e-167
PMP2	0.00181323662737987	0.39799635701275	538.424644685247	4.15096098859423e-119	7.96071298392601e-115
CTSB	0	0.336065573770492	442.937414667633	2.48402724582828e-98	4.76386745204948e-94
AKR7A2	0.000906618313689937	0.123861566484517	140.416009200038	2.158952450415e-32	4.14043900940589e-28
HSPB3	0.000906618313689937	0.127504553734062	144.979918525834	2.16945808512983e-33	4.16058671566199e-29
CTSS	0	0.516393442622951	764.529846341275	2.78054464395939e-168	5.33252851818532e-164
KDM2B	0	0.0683060109289618	75.9379264815224	2.92723428044392e-18	5.61384990303535e-14
NAA15	0	0.0701275045537341	78.0910145866485	9.84005435570406e-19	1.88712562433692e-14
ADGRB2	0	0.0983606557377049	111.991789767092	3.58792930267723e-26	6.88093081667439e-22
METTL8	0.000906618313689937	0.0446265938069217	45.4259656773781	1.58518849649634e-11	3.04007449858068e-07
MOB3C	0	0.0883424408014572	99.8478501098372	1.64565900586024e-23	3.15604484143877e-19
SMN2	0	0.122950819672131	142.348671243786	8.15911456088885e-33	1.56475499048726e-28
SLMAP	0.000906618313689937	0.111111111111111	124.581704452376	6.28377814898976e-29	1.20510297341326e-24
ACTR10	0	0.102914389799636	117.554132216331	2.17093427110123e-27	4.16341774511794e-23
UBE2E3	0	0.0418943533697632	45.1707065722392	1.80586172080178e-11	3.46328160815365e-07
NAA10	0	0.046448087431694	50.4154862878962	1.2440860764818e-12	2.3859082774768e-08
LA16c-431H6.6	0	0.283242258652095	361.493722483988	1.33147197982358e-80	2.55349696290566e-76
WDR76	0	0.0910746812386157	103.147198577794	3.11149283476603e-24	5.96722095851429e-20
PRKCD	0	0.115664845173042	133.271552386961	7.88536310772085e-31	1.5122549367987e-26
DCTPP1	0	0.269581056466302	341.237875384213	3.42992629785692e-76	6.57791265403e-72
FIS1	0	0.10655737704918	122.023250109717	2.28148539532661e-28	4.37543269115737e-24
PLPPR2	0	0.0710382513661202	79.1690868026161	5.70152621815275e-19	1.09343869811733e-14
IFT122	0	0.0865209471766849	97.6535179466407	4.98385400169837e-23	9.55803520445713e-19
MAGEA1	0	0.0373406193078324	39.9507379401292	2.6044915643605e-10	4.99489392213057e-06
C1orf146	0	0.111111111111111	127.633860551138	1.34982661394651e-29	2.58869748022662e-25
NUBP1	0	0.305100182149362	394.580479592199	8.33136239565525e-88	1.59778868023876e-83
NGLY1	0	0.0774134790528233	86.7442376274021	1.2350313019115e-20	2.36854303080587e-16
GOT2	0.000906618313689937	0.309653916211293	398.269240333033	1.31129767623082e-88	2.51480668347547e-84
SLC6A14	0.000906618313689937	0.0218579234972678	19.6837614888871	9.13745376949836e-06	0.17523808839144
CNTROB	0	0.245901639344262	306.873266010478	1.04802977603413e-68	2.00991150447825e-64
ADA	0.00181323662737987	0.189435336976321	222.258509663056	2.90908366234308e-50	5.57904064764156e-46
CXCL9	0	0.0956284153005464	108.667142153936	1.91960691060315e-25	3.68142213315472e-21
PSMA1	0.00181323662737987	0.116575591985428	128.341920569238	9.44803452600164e-30	1.81194406139659e-25
CENPE	0	0.0774134790528233	86.7442376274021	1.2350313019115e-20	2.36854303080587e-16
NKRF	0.000906618313689937	0.0227686703096539	20.695361943265	5.38462707872029e-06	0.103266378115698
GPR35	0	0.0692167577413479	77.0139615651969	1.69753681126104e-18	3.25553609663642e-14
CTGF	0	0.160291438979964	189.995303833906	3.18680958238681e-43	6.11166341710142e-39
AHCYL2	0	0.109289617486339	125.386377334497	4.18901417741995e-29	8.03369138945598e-25
EML1	0.000906618313689937	0.102914389799636	114.515712207487	1.00467028907808e-26	1.92675668039394e-22
COPA	0	0.538251366120219	808.885812255267	6.31159060636041e-178	1.2104368464878e-173
IFI35	0.000906618313689937	0.163934426229508	191.618067018344	1.40977446969085e-43	2.70366547797311e-39
MRPS11	0	0.105646630236794	120.904360975029	4.0100522805236e-28	7.69047826358816e-24
ZNF726	0	0.0473588342440801	51.4674212860382	7.2795130984703e-13	1.39606502202463e-08
GPR37	0	0.107468123861566	123.143214869447	1.29738122602225e-28	2.48811771526547e-24
CST11	0	0.158469945355191	187.62633866331	1.04825458709507e-42	2.01034264713093e-38
GCM2	0	0.153005464480874	180.547419393029	3.68042046311408e-41	7.05831036416018e-37
IFNW1	0.000906618313689937	0.153005464480874	177.43306753047	1.7616013143704e-40	3.37839900069955e-36
GPT2	0.000906618313689937	0.295081967213115	376.016675157577	9.16654214769545e-84	1.75795945308503e-79
CELA3B	0	0.11384335154827	131.013213586699	2.45963552571946e-30	4.71708901122478e-26
GOLGA8A	0	0.101092896174863	115.325996882723	6.67677841881049e-27	1.28047256515948e-22
PMF1-BGLAP	0	0.513661202185792	759.07679979462	4.26377416491213e-167	8.17706609346848e-163
BFSP1	0	0.174863387978142	209.116880247315	2.14061908388868e-47	4.10527927908171e-43
LCP2	0.00181323662737987	0.112932604735883	123.838777644333	9.13742948039245e-29	1.75237622574966e-24
PPP6C	0.00271985494106981	0.104735883424408	110.864381476406	6.33602344988534e-26	1.21512257721901e-21
MPHOSPH9	0	0.0746812386156648	83.4915931402682	6.39875086724428e-20	1.22715244132011e-15
ADAM29	0	0.0965391621129326	109.774298314311	1.09807945314936e-25	2.10589677524984e-21
IL15RA	0	0.151183970856102	178.197059427602	1.19973717880969e-40	2.30085596152122e-36
AK3	0.00362647325475975	0.165755919854281	184.863789082433	4.20275497991762e-42	8.06004350048601e-38
TACC2	0.00271985494106981	0.111111111111111	118.668826182871	1.23759316158783e-27	2.37345616529314e-23
MPP1	0	0.0391621129326047	42.035747263585	8.96200231858492e-11	1.71873280465822e-06
NDUFAF1	0	0.0947176684881603	107.561043750022	3.354137196678e-25	6.43256431578907e-21
PTPN9	0	0.0810564663023679	91.0955180434138	1.36901417587232e-21	2.62549538648794e-17
RP11-382A20.3	0	0.0938069216757741	106.456001642844	5.85787389460085e-25	1.12342305550655e-20
MAS1L	0	0.112932604735883	129.885676763625	4.34071682148543e-30	8.32462672024476e-26
RNF222	0	0.246812386156648	308.177859768971	5.44715072766855e-69	1.04465456655227e-64
CCL15	0	0.178506375227687	213.944972339401	1.89331037776265e-48	3.63099064247321e-44
MRPS25	0.000906618313689937	0.0883424408014572	96.8360897384076	7.53107844234761e-23	1.44431022367342e-18
TAP1	0	0.110200364298725	126.509578085074	2.37850986762151e-29	4.56150622412453e-25
AC073657.1	0	0.0956284153005464	108.667142153936	1.91960691060315e-25	3.68142213315472e-21
DSE	0	0.182149362477231	218.79237182518	1.6588278345047e-49	3.18130002101311e-45
CCND3	0	0.135701275045537	158.404065132319	2.52552396420826e-36	4.8434498585586e-32
ATP6V0E2	0	0.117486338797814	135.53425506436	2.52277621816039e-31	4.838180231188e-27
HNRNPDL	0	0.0701275045537341	78.0910145866485	9.84005435570406e-19	1.88712562433692e-14
AC003002.4	0	0.0892531876138433	100.946584812457	9.44977196481201e-24	1.81227726741165e-19
SIGLEC1	0	0.164845173041894	195.938246853666	1.60783640585821e-44	3.08350865915487e-40
MAGEC1	0	0.0327868852459016	34.7556286872353	3.73796411023207e-09	7.16866757060306e-05
PABPC1L2B	0.00181323662737987	0.0136612021857923	8.59160010698244	0.00337717131228184	1
AMN	0	0.108378870673953	124.264256770829	7.37393296826173e-29	1.41417286465323e-24
UQCRQ	0	0.105646630236794	120.904360975029	4.0100522805236e-28	7.69047826358816e-24
SNAP25	0.00181323662737987	0.164845173041894	189.721376330593	3.65720074224266e-43	7.01377958347297e-39
CTSW	0	0.0883424408014572	99.8478501098372	1.64565900586024e-23	3.15604484143877e-19
SLC46A1	0	0.17304189435337	206.710038562405	7.17246712166079e-47	1.37553574459211e-42
DGKZ	0.000906618313689937	0.0856102003642987	93.5515724516684	3.95753115320078e-22	7.58975324560846e-18
ZIC2	0	0.204918032786885	249.533341323307	3.28228170195255e-56	6.2947598480046e-52
PEPD	0.000906618313689937	0.0938069216757741	103.433844431329	2.69235903997965e-24	5.16340616687297e-20
GARNL3	0.000906618313689937	0.102914389799636	114.515712207487	1.00467028907808e-26	1.92675668039394e-22
RNF26	0	0.243169398907104	302.96758012127	7.43440186647511e-68	1.4257695899526e-63
SH3BP4	0	0.0591985428051002	65.2332953689644	6.65358094439778e-16	1.27602375351661e-11
RCC1	0	0.110200364298725	126.509578085074	2.37850986762151e-29	4.56150622412453e-25
IPO13	0.000906618313689937	0.092896174863388	102.331553025679	4.69651688645463e-24	9.00698008484269e-20
ANKRD20A3	0	0.0655737704918033	72.7159164761831	1.49721726795334e-17	2.87136327648092e-13
ZFP30	0	0.0919854280510018	104.249080504143	1.78415788957303e-24	3.42165800062316e-20
MTSS1	0.00543970988213962	0.454462659380692	624.968619259547	6.21022670340502e-138	1.19099727717901e-133
RP3-468K18.7	0	0.168488160291439	200.713832735135	1.45901236121098e-45	2.79809390633042e-41
FTL	0.000906618313689937	0.0683060109289618	72.9704979740537	1.31602390784045e-17	2.52387065045641e-13
ZFAND2A	0.000906618313689937	0.143897996357013	165.74002813965	6.30455724612276e-38	1.20908798866142e-33
SCIMP	0	0.228597449908925	282.340236480581	2.32073475073888e-63	4.45070510496702e-59
RNF112	0	0.217668488160291	267.090534248766	4.88682900427375e-60	9.3719606643962e-56
UVRAG	0	0.20856102003643	254.52424069987	2.68008771174966e-57	5.1398722135935e-53
RSPRY1	0	0.313296903460838	407.20851262399	1.48513722074566e-90	2.84819616194603e-86
SLC19A2	0	0.522768670309654	777.331826037277	4.5773971572953e-171	8.77853226826093e-167
RPAP1	0	0.0965391621129326	109.774298314311	1.09807945314936e-25	2.10589677524984e-21
TLDC1	0	0.336976320582878	444.386865275091	1.20145053056131e-98	2.30414182751048e-94
DDX4	0	0.13023679417122	151.496416345484	8.16374056040252e-35	1.565642164674e-30
ZNF212	0.000906618313689937	0.121129326047359	137.004746887715	1.20297169754369e-31	2.30705912154929e-27
FHAD1	0.000906618313689937	0.126593806921676	143.83726972109	3.85628831958648e-33	7.39558973930295e-29
KHDC1	0.000906618313689937	0.145719489981785	168.069429094088	1.95360257371722e-38	3.74661901587488e-34
SRFBP1	0	0.111111111111111	127.633860551138	1.34982661394651e-29	2.58869748022662e-25
PSMC1	0.000906618313689937	0.110200364298725	123.458912535907	1.10654078262404e-28	2.12212391291638e-24
RRAGA	0.000906618313689937	0.141165755919854	162.254506127671	3.63987739288995e-37	6.98055686408435e-33
OSBPL9	0	0.087431693989071	98.7501616272355	2.86453575608321e-23	5.49360667301638e-19
DEFB116	0	0.150273224043716	177.02361175084	2.16429268836832e-40	4.15068051775276e-36
ZNF35	0	0.101092896174863	115.325996882723	6.67677841881049e-27	1.28047256515948e-22
MET	0.000906618313689937	0.104735883424408	116.745007665415	3.26453292695244e-27	6.26072124730939e-23
ATP2B1	0	0.0956284153005464	108.667142153936	1.91960691060315e-25	3.68142213315472e-21
STAP2	0	0.0792349726775956	88.9178131914755	4.11560709029152e-21	7.89291127776108e-17
SLC5A12	0	0.111111111111111	127.633860551138	1.34982661394651e-29	2.58869748022662e-25
TPRA1	0	0.0856102003642987	96.5579176558098	8.66710083014542e-23	1.66217659720529e-18
SLC39A10	0	0.0446265938069217	48.3145964197624	3.63039809481072e-12	6.962377466228e-08
ATF3	0	0.541894353369763	816.407362247147	1.46167245163134e-179	2.80319542773858e-175
ZBTB21	0	0.110200364298725	126.509578085074	2.37850986762151e-29	4.56150622412453e-25
DNASE1L1	0	0.0437158469945355	47.2656407481687	6.19893609935481e-12	1.18883196513427e-07
NIPAL3	0	0.112021857923497	128.759226265191	7.65650097941709e-30	1.46836375783261e-25
ANKRD46	0.00181323662737987	0.455373406193078	640.36664399564	2.78099495069651e-141	5.33339211644577e-137
AC003005.4	0.000906618313689937	0.0883424408014572	96.8360897384076	7.53107844234761e-23	1.44431022367342e-18
TAS2R8	0	0.122040072859745	141.21018562702	1.44737799576088e-32	2.77578152027022e-28
GRPEL1	0	0.109289617486339	125.386377334497	4.18901417741995e-29	8.03369138945598e-25
CLDN20	0	0.160291438979964	189.995303833906	3.18680958238681e-43	6.11166341710142e-39
TULP4	0.00181323662737987	0.173952641165756	201.669514745156	9.0263837419781e-46	1.73107987403656e-41
MEX3B	0	0.092896174863388	105.352014377528	1.02256423556152e-24	1.96107369095988e-20
GPX8	0	0.129326047358834	150.349058019671	1.45433524206431e-34	2.78912412723093e-30
CLP1	0.000906618313689937	0.112021857923497	125.705587786961	3.56658444719828e-29	6.83999565283686e-25
PON2	0	0.116575591985428	134.402357463757	4.46130818695154e-31	8.55589684093566e-27
PLCB1	0.00271985494106981	0.17304189435337	197.411374982698	7.66912481638123e-45	1.47078475728559e-40
HELLS	0	0.0783242258652095	87.8305099254412	7.13104526287773e-21	1.36759186051469e-16
WIPF3	0	0.131147540983607	152.644890967893	4.58017460300657e-35	8.783858853646e-31
APC2	0	0.102914389799636	117.554132216331	2.17093427110123e-27	4.16341774511794e-23
FAM129A	0	0.522768670309654	777.331826037277	4.5773971572953e-171	8.77853226826093e-167
PAPD4	0.000906618313689937	0.128415300546448	146.123684101544	1.21983762322968e-33	2.33940459382988e-29
MAGEB6	0.000906618313689937	0.0519125683060109	53.8239797116922	2.19279996594646e-13	4.20535177469212e-09
TMPRSS11E	0	0.0710382513661202	79.1690868026161	5.70152621815275e-19	1.09343869811733e-14
CSK	0	0.0810564663023679	91.0955180434138	1.36901417587232e-21	2.62549538648794e-17
ASH1L	0	0.529143897996357	790.244440829859	7.13036055940575e-174	1.36746054808283e-169
C8orf76	0.000906618313689937	0.453551912568306	640.484130940145	2.62209560129522e-141	5.02865494416397e-137
TPH1	0	0.110200364298725	126.509578085074	2.37850986762151e-29	4.56150622412453e-25
UGT1A6	0.000906618313689937	0.0573770491803279	60.1679485779983	8.70990183695745e-15	1.6703849742917e-10
AGO1	0	0.092896174863388	105.352014377528	1.02256423556152e-24	1.96107369095988e-20
TSNAXIP1	0	0.311475409836066	404.391715880744	6.09433304149247e-90	1.16877119069743e-85
PRSS54	0	0.313296903460838	407.20851262399	1.48513722074566e-90	2.84819616194603e-86
HIST1H2BI	0	0.115664845173042	133.271552386961	7.88536310772085e-31	1.5122549367987e-26
CXorf49B	0	0.0163934426229508	16.2659942630337	5.50429749949667e-05	1
IKBKG	0	0.0418943533697632	45.1707065722392	1.80586172080178e-11	3.46328160815365e-07
PNRC1	0	0.180327868852459	216.366251446347	5.61081856856411e-49	1.07604278507922e-44
MME	0	0.122040072859745	141.21018562702	1.44737799576088e-32	2.77578152027022e-28
PPP1R35	0	0.109289617486339	125.386377334497	4.18901417741995e-29	8.03369138945598e-25
CD200R1	0	0.0810564663023679	91.0955180434138	1.36901417587232e-21	2.62549538648794e-17
TFB1M	0	0.160291438979964	189.995303833906	3.18680958238681e-43	6.11166341710142e-39
SPINT2	0	0.0974499089253188	110.882513695638	6.27833544390129e-26	1.20405917143139e-21
EMD	0	0.0437158469945355	47.2656407481687	6.19893609935481e-12	1.18883196513427e-07
CCM2L	0	0.158469945355191	187.62633866331	1.04825458709507e-42	2.01034264713093e-38
DNAJC5G	0	0.0528233151183971	57.7999282715382	2.90180302459607e-14	5.56507784057034e-10
KRTAP2-1	0	0.180327868852459	216.366251446347	5.61081856856411e-49	1.07604278507922e-44
MS4A10	0	0.110200364298725	126.509578085074	2.37850986762151e-29	4.56150622412453e-25
TRAPPC9	0.00453309156844968	0.436247723132969	595.313350274135	1.7506093867365e-131	3.35731868188326e-127
DUSP10	0	0.546448087431694	825.862152895553	1.28609806939325e-181	2.46647887748238e-177
ZNF575	0	0.0774134790528233	86.7442376274021	1.2350313019115e-20	2.36854303080587e-16
SMAD5	0	0.0947176684881603	107.561043750022	3.354137196678e-25	6.43256431578907e-21
CLOCK	0	0.075591985428051	84.5747805666215	3.69954185087099e-20	7.09498136160038e-16
GABARAPL1	0	0.122040072859745	141.21018562702	1.44737799576088e-32	2.77578152027022e-28
PTAFR	0	0.111111111111111	127.633860551138	1.34982661394651e-29	2.58869748022662e-25
TCF3	0	0.107468123861566	123.143214869447	1.29738122602225e-28	2.48811771526547e-24
SLC46A2	0	0.0956284153005464	108.667142153936	1.91960691060315e-25	3.68142213315472e-21
FSHR	0.00181323662737987	0.0683060109289618	70.1051098972259	5.62271283242767e-17	1.07832386700298e-12
RPS6KC1	0	0.54735883424408	827.760202156689	4.9730249206283e-182	9.53726719278095e-178
RAB3B	0	0.0828779599271403	93.2773630892577	4.54561443226851e-22	8.71757935820455e-18
HLA-DRB5	0	0.110200364298725	126.509578085074	2.37850986762151e-29	4.56150622412453e-25
FXYD3	0	0.092896174863388	105.352014377528	1.02256423556152e-24	1.96107369095988e-20
HBEGF	0	0.0910746812386157	103.147198577794	3.11149283476603e-24	5.96722095851429e-20
ZNF274	0	0.0919854280510018	104.249080504143	1.78415788957303e-24	3.42165800062316e-20
LCE6A	0.00271985494106981	0.522768670309654	766.664342642582	9.55049872402854e-169	1.83159464529419e-164
ERCC1	0	0.0801457194899818	90.0061487775805	2.37421005152881e-21	4.55326003682195e-17
FAM50A	0	0.0446265938069217	48.3145964197624	3.63039809481072e-12	6.962377466228e-08
KCNAB1	0.000906618313689937	0.126593806921676	143.83726972109	3.85628831958648e-33	7.39558973930295e-29
HSD11B2	0	0.309653916211293	401.580973746402	2.49332113851812e-89	4.78169127945005e-85
ETS2	0	0.0983606557377049	111.991789767092	3.58792930267723e-26	6.88093081667439e-22
CT47A2	0	0.0218579234972678	22.3905523592203	2.22465661848974e-06	0.0426644646293962
NR2C1	0	0.0792349726775956	88.9178131914755	4.11560709029152e-21	7.89291127776108e-17
C2orf42	0	0.0482695810564663	52.5203503198579	4.258130438957e-13	8.16624255583173e-09
RPS6KA4	0	0.116575591985428	134.402357463757	4.46130818695154e-31	8.55589684093566e-27
SUCLG1	0	0.0500910746812386	54.6291928688414	1.45557287588832e-13	2.79149766137862e-09
METTL17	0.000906618313689937	0.100182149362477	111.179865740103	5.40385679020553e-26	1.03635165522562e-21
CD79A	0	0.0774134790528233	86.7442376274021	1.2350313019115e-20	2.36854303080587e-16
SRP19	0	0.111111111111111	127.633860551138	1.34982661394651e-29	2.58869748022662e-25
CFAP44	0	0.0837887067395264	94.3698416242314	2.61749973278805e-22	5.01984098754092e-18
COL6A1	0	0.1183970856102	136.667246747984	1.42583956641807e-31	2.73447512047657e-27
SLC11A2	0.000906618313689937	0.058287795992714	61.2290108035734	5.08073303709513e-15	9.74382981854104e-11
CDAN1	0	0.0901639344262295	102.046367158732	5.42372800574511e-24	1.0401625569418e-19
ASPG	0	0.10655737704918	122.023250109717	2.28148539532661e-28	4.37543269115737e-24
HCAR1	0	0.0664845173041894	73.7889051620255	8.69338579712059e-18	1.66721752817179e-13
MCFD2	0	0.0628415300546448	69.5030239141286	7.62974494778101e-17	1.46323248608544e-12
MYL1	0	0.0473588342440801	51.4674212860382	7.2795130984703e-13	1.39606502202463e-08
RPL29	0	0.111111111111111	127.633860551138	1.34982661394651e-29	2.58869748022662e-25
KIAA1715	0	0.040983606557377	44.1247278223639	3.08104059265001e-11	5.90881964858419e-07
PSMB9	0	0.110200364298725	126.509578085074	2.37850986762151e-29	4.56150622412453e-25
TMEM2	0	0.101092896174863	115.325996882723	6.67677841881049e-27	1.28047256515948e-22
CNR1	0.00181323662737987	0.17304189435337	200.469311977098	1.64974988106413e-45	3.16389032190479e-41
USP46	0	0.063752276867031	70.5729770331577	4.43551329395536e-17	8.50642739514759e-13
HIST2H2AC	0	0.403460837887067	554.650757778844	1.22537497201094e-122	2.35002412132258e-118
NACA2	0	0.231329690346084	286.182036914555	3.37656129497366e-64	6.47556925150048e-60
SCAMP5	0	0.0819672131147541	92.1859223559541	7.89040688660219e-22	1.51322223271257e-17
PCID2	0	0.205828779599271	250.779170602092	1.7562021296358e-56	3.36804444421554e-52
TRIB2	0	0.0628415300546448	69.5030239141286	7.62974494778101e-17	1.46323248608544e-12
PDCL3	0	0.0428051001821494	46.2176775244843	1.05817914336377e-11	2.02937596114304e-07
NR2E3	0	0.0792349726775956	88.9178131914755	4.11560709029152e-21	7.89291127776108e-17
COL19A1	0.000906618313689937	0.150273224043716	173.91304335842	1.03412771753326e-39	1.98325013668529e-35
NDRG4	0	0.314207650273224	408.619187589254	7.32310210912441e-91	1.40442452248788e-86
CXCL12	0.000906618313689937	0.0737704918032787	79.4286801049336	4.99950714863977e-19	9.58805480966135e-15
ADAM19	0.000906618313689937	0.0974499089253188	107.853706795792	2.8936786217746e-25	5.54949686083933e-21
ATP8A1	0	0.0865209471766849	97.6535179466407	4.98385400169837e-23	9.55803520445713e-19
SAA1	0	0.111111111111111	127.633860551138	1.34982661394651e-29	2.58869748022662e-25
CCND2	0.00362647325475975	0.138433515482696	149.806444897463	1.9110253462314e-34	3.66496440900258e-30
CRIPT	0	0.0610200364298725	67.3661451021741	2.25487908993277e-16	4.32440711867307e-12
CCDC166	0.00181323662737987	0.418943533697632	574.785225778362	5.10986030239305e-127	9.79969008792939e-123
STX4	0	0.26775956284153	338.561173389404	1.31287495272472e-75	2.51783158433547e-71
ELOF1	0	0.0719489981785064	80.2481794814122	3.30216578881196e-19	6.33289354978358e-15
TMEM262	0	0.0883424408014572	99.8478501098372	1.64565900586024e-23	3.15604484143877e-19
PDE1B	0	0.0601092896174863	66.2992171524673	3.87412500579613e-16	7.42979693611582e-12
OR1F1	0	0.275956284153005	350.650758799959	3.05793344530256e-78	5.86450476140125e-74
GIPC1	0	0.0746812386156648	83.4915931402682	6.39875086724428e-20	1.22715244132011e-15
P2RX7	0.00271985494106981	0.0655737704918033	64.1488910428764	1.15362914919412e-15	2.21242998232448e-11
PRKAG2	0.00181323662737987	0.12568306010929	139.677880404215	3.13079343015607e-32	6.00423564035331e-28
CPLX2	0.000906618313689937	0.112932604735883	126.830563870709	2.02330747296001e-29	3.88029907164271e-25
USP32	0	0.24408014571949	304.268128279318	3.87178707007485e-68	7.42531324298955e-64
PDCD4	0.000906618313689937	0.0901639344262295	99.0310802395469	2.48569926082112e-23	4.76707404240274e-19
TOM1	0	0.186703096539162	224.878948622002	7.80211227146895e-51	1.49628909142232e-46
SLC37A1	0	0.109289617486339	125.386377334497	4.18901417741995e-29	8.03369138945598e-25
FBXW8	0.000906618313689937	0.0737704918032787	79.4286801049336	4.99950714863977e-19	9.58805480966135e-15
CHGB	0	0.156648451730419	185.262045352533	3.44026136370091e-42	6.59773324330561e-38
CUX2	0.000906618313689937	0.0646630236794171	68.6860955650859	1.15452075522673e-16	2.21413990437382e-12
CTD-2369P2.12	0	0.0728597449908925	81.3282939023744	1.91169921745354e-19	3.6662567592324e-15
C6orf89	0.000906618313689937	0.122040072859745	138.14072582529	6.78910969590913e-32	1.30201545748145e-27
CERS3	0.00181323662737987	0.12568306010929	139.677880404215	3.13079343015607e-32	6.00423564035331e-28
LECT1	0	0.198542805100182	240.847724248026	2.56959768063844e-54	4.9279744319284e-50
ITSN2	0	0.0573770491803279	63.1044660176753	1.96029135219058e-15	3.75944675523109e-11
SGPP2	0.000906618313689937	0.0555555555555556	58.0490158954499	2.5566732209254e-14	4.90318790309073e-10
TSPAN11	0.000906618313689937	0.109289617486339	122.337210717186	1.94756876838523e-28	3.73504738400919e-24
SLC12A1	0.00362647325475975	0.0901639344262295	90.4471080469936	1.8998841301984e-21	3.64359778489449e-17
VPS4A	0	0.312386156648452	405.799356204511	3.00960915742687e-90	5.77182844211325e-86
CTD-2574D22.6	0	0.264116575591985	333.224578670884	1.90756787381081e-74	3.65833366839437e-70
SCML1	0	0.0564663023679417	62.041556368439	3.36285214548535e-15	6.44927784461180e-11
SQRDL	0	0.0901639344262295	102.046367158732	5.42372800574511e-24	1.0401625569418e-19
EGLN1	0	0.550091074681239	833.468612126949	2.85473880623111e-183	5.47481808259002e-179
NSA2	0	0.124772313296903	144.628954610224	2.58869796121445e-33	4.96460495001707e-29
PPIAL4C	0	0.403460837887067	554.650757778844	1.22537497201094e-122	2.35002412132258e-118
AL136097.1	0	0.0938069216757741	106.456001642844	5.85787389460085e-25	1.12342305550655e-20
CTD-2116N17.1	0	0.0819672131147541	92.1859223559541	7.89040688660219e-22	1.51322223271257e-17
TPP1	0	0.121129326047359	140.072801944905	2.56621872284125e-32	4.92149426666495e-28
SLC9A8	0	0.223132969034608	274.691993494574	1.07731244245994e-61	2.06606980214967e-57
PCDHB2	0	0.0910746812386157	103.147198577794	3.11149283476603e-24	5.96722095851429e-20
MSH3	0	0.126593806921676	146.913664738406	8.19604965506095e-34	1.57183840284759e-29
ODF2	0	0.100182149362477	114.213529880073	1.17005360366453e-26	2.24392880110784e-22
ITPKA	0	0.0947176684881603	107.561043750022	3.354137196678e-25	6.43256431578907e-21
TCEAL3	0	0.0154826958105647	15.2494668292624	9.42033452479637e-05	1
TDRKH	0	0.517304189435337	766.351980928391	1.11671614787691e-168	2.14163822839834e-164
FCRLB	0	0.540072859744991	812.641909644109	9.62740194068653e-179	1.84634314418486e-174
DAGLA	0	0.111111111111111	127.633860551138	1.34982661394651e-29	2.58869748022662e-25
NOTUM	0	0.199453551912568	242.084769853836	1.38083141836861e-54	2.64815849414732e-50
HRK	0.000906618313689937	0.0728597449908925	78.349685270707	8.63231069355257e-19	1.65550454480951e-14
RPH3A	0.00271985494106981	0.0737704918032787	73.7485481719843	8.87295208200984e-18	1.70165475028785e-13
MTERF4	0.00271985494106981	0.0710382513661202	70.5378117399133	4.51528625784766e-17	8.65941598530024e-13
C7orf55-LUC7L2	0.00181323662737987	0.11384335154827	124.962896687678	5.18552610721905e-29	9.94480196842469e-25
FBXL19	0	0.269581056466302	341.237875384213	3.42992629785692e-76	6.57791265403e-72
MTFMT	0	0.0774134790528233	86.7442376274021	1.2350313019115e-20	2.36854303080587e-16
HSPB1	0	0.0883424408014572	99.8478501098372	1.64565900586024e-23	3.15604484143877e-19
MEGF8	0	0.0792349726775956	88.9178131914755	4.11560709029152e-21	7.89291127776108e-17
CBLN4	0	0.248633879781421	310.791107567942	1.46854727229749e-69	2.81637995881213e-65
PCDHGC5	0	0.0919854280510018	104.249080504143	1.78415788957303e-24	3.42165800062316e-20
YPEL1	0	0.159380692167577	188.810236404934	5.78142531668859e-43	1.10876174723454e-38
CIB4	0.000906618313689937	0.0528233151183971	54.8786286372113	1.2820756378203e-13	2.45876465821177e-09
CLEC18C	0	0.305100182149362	394.580479592199	8.33136239565525e-88	1.59778868023876e-83
SLCO4A1	0.000906618313689937	0.248633879781421	307.553952414729	7.44880149840046e-69	1.42853115136324e-64
NHLRC1	0	0.134790528233151	157.249984750562	4.51362222752615e-36	8.65622470794965e-32
POLR3GL	0	0.173952641165756	207.912860530864	3.91950364831922e-47	7.5168240967466e-43
OR9A4	0	0.109289617486339	125.386377334497	4.18901417741995e-29	8.03369138945598e-25
TAF6	0	0.112932604735883	129.885676763625	4.34071682148543e-30	8.32462672024476e-26
SOX14	0	0.104735883424408	119.786545952838	7.04474435619752e-28	1.35104107263156e-23
FSCB	0	0.0992714025500911	113.102128002462	2.04942098346858e-26	3.93037956209604e-22
SULF2	0	0.212204007285974	259.535431266358	2.16661313812195e-58	4.15513067629028e-54
TDRD7	0	0.0919854280510018	104.249080504143	1.78415788957303e-24	3.42165800062316e-20
LAMB1	0	0.101092896174863	115.325996882723	6.67677841881049e-27	1.28047256515948e-22
CDC42EP5	0	0.0819672131147541	92.1859223559541	7.89040688660219e-22	1.51322223271257e-17
POU2AF1	0	0.257741347905282	323.939102289011	2.00860991096482e-72	3.85211208724833e-68
CNRIP1	0	0.0510018214936248	55.6851077161429	8.50602136420099e-14	1.63128477722647e-09
CATSPER4	0	0.109289617486339	125.386377334497	4.18901417741995e-29	8.03369138945598e-25
OR51J1	0	0.116575591985428	134.402357463757	4.46130818695154e-31	8.55589684093566e-27
POFUT2	0	0.108378870673953	124.264256770829	7.37393296826173e-29	1.41417286465323e-24
PSMA8	0	0.119307832422587	137.801334077567	8.05447961614703e-32	1.54468810078468e-27
TRAT1	0.000906618313689937	0.0746812386156648	80.5087277506493	2.894237479152e-19	5.55056863751771e-15
LGALS1	0	0.18488160291439	222.440661507451	2.65476520024371e-50	5.09130870102739e-46
DIS3	0	0.187613843351548	226.099925863946	4.22585656695139e-51	8.10434772409938e-47
AKAP14	0	0.0209471766848816	21.366940797415	3.79254652448788e-06	0.0727334572466286
MGAT4C	0.00181323662737987	0.101092896174863	109.325866107279	1.37683824222798e-25	2.64050038094482e-21
RP4-734P14.4	0	0.15391621129326	181.72433507503	2.03674991626507e-41	3.90607898941315e-37
USP6	0	0.228597449908925	282.340236480581	2.32073475073888e-63	4.45070510496702e-59
KLHL20	0.000906618313689937	0.513661202185792	755.517638356135	2.5332272883268e-166	4.85822329355314e-162
FAM19A5	0.00815956482320943	0.225865209471767	250.769604908084	1.76465528742387e-56	3.3842559102215e-52
PARP10	0.00181323662737987	0.422586520947177	581.207248625659	2.04870793353096e-128	3.92901207492568e-124
IGFBP6	0	0.0573770491803279	63.1044660176753	1.96029135219058e-15	3.75944675523109e-11
CTD-2545M3.6	0	0.075591985428051	84.5747805666215	3.69954185087099e-20	7.09498136160038e-16
USP3	0	0.0837887067395264	94.3698416242314	2.61749973278805e-22	5.01984098754092e-18
FNDC3B	0.000906618313689937	0.155737704918033	180.963537261841	2.98568563091579e-41	5.7259479029703e-37
GNG11	0	0.108378870673953	124.264256770829	7.37393296826173e-29	1.41417286465323e-24
CIZ1	0	0.10200364298725	116.439530497623	3.8081508916268e-27	7.30327177996188e-23
C11orf58	0	0.114754098360656	132.141838278508	1.39302108484303e-30	2.67153583651196e-26
TMEM170A	0	0.327868852459016	429.963219920196	1.65536292841439e-95	3.17465502411312e-91
ART1	0.000906618313689937	0.122040072859745	138.14072582529	6.78910969590913e-32	1.30201545748145e-27
SH2D1B	0	0.545537340619308	823.966473246714	3.32210611612737e-181	6.37113510950907e-177
PRDM2	0	0.124772313296903	144.628954610224	2.58869796121445e-33	4.96460495001707e-29
CTDSP1	0	0.0500910746812386	54.6291928688414	1.45557287588832e-13	2.79149766137862e-09
[truncated: 17,179 more rows]
